# Supplementary material
Source: PubMed Central journal article supplement (PMC3060082)
Supplement: NIHMS245301-supplement-1_si_001.pdf [file NIHMS245301-supplement-1_si_001.pdf]

## Supporting Information:

Nicotinic Acid Adenine Dinucleotide Phosphate Analogs Containing Substituted

Nicotinic Acid: Effect of Modification on Ca<sup>2+</sup> Release

Pooja Jain<sup>§‡</sup>, James T. Slama<sup>§\*</sup>, LeRoy A. Perez-Haddock<sup>†</sup> and Timothy F. Walseth<sup>†</sup>

<sup>§</sup>Department of Medicinal and Biological Chemistry, College of Pharmacy, The

University of Toledo, Toledo, OH 43614; <sup>‡</sup>Department of Pharmacology, University of

Minnesota Medical School, Minneapolis, MN 55455

|                                                                                                    |       |
|----------------------------------------------------------------------------------------------------|-------|
| <b>Table of Contents</b>                                                                           | S1-S4 |
| Figure S1. Scatter plot of log IC <sub>50</sub> vs log EC <sub>50</sub> for NAADP and its' analogs | S5    |
| Figure S2. HPLC analysis of NAADP and analogs <b>16 – 24</b>                                       | S6    |
| <b>Spectroscopic properties of synthetic compounds</b>                                             |       |
| <i>A. Pyridine-3-carboxylic acids</i>                                                              | S7    |
| Figure S3. <sup>1</sup> H-NMR of <b>2c</b> : 4- <i>n</i> -butylnicotinic acid                      | S7    |
| Figure S4. <sup>1</sup> H-NMR of <b>2d</b> : 4-phenylnicotinic acid                                | S8    |
| Figure S5. <sup>1</sup> H-NMR of <b>3e</b> : 5-ethynylnicotinic acid                               | S9    |
| Figure S6. <sup>13</sup> C-NMR of <b>3e</b> : 5-ethynylnicotinic acid                              | S10   |
| Figure S7. <sup>1</sup> H-NMR of <b>3f</b> : 5-ethenylnicotinic acid                               | S11   |
| Figure S8. <sup>13</sup> C-NMR of <b>3f</b> : 5-ethenylnicotinic acid                              | S12   |
| Figure S9. <sup>1</sup> H-NMR of <b>3g</b> : 5-ethylnicotinic acid                                 | S13   |
| Figure S10. <sup>13</sup> C-NMR of <b>3g</b> : 5-ethylnicotinic acid                               | S14   |

|             |                                                                                                     |     |
|-------------|-----------------------------------------------------------------------------------------------------|-----|
| Figure S11. | <sup>1</sup> H-NMR of <b>3h</b> : 5-phenylnicotinic acid                                            | S15 |
| Figure S12. | <sup>13</sup> C-NMR of <b>3h</b> : 5-phenylnicotinic acid                                           | S16 |
| Figure S13. | <sup>1</sup> H-NMR of <b>3i</b> : 5-azidonicotinic acid                                             | S17 |
| Figure S14. | <sup>13</sup> C-NMR of <b>3i</b> : 5-azidonicotinic acid                                            | S18 |
| Figure S15. | <sup>1</sup> H-NMR of <b>3j</b> : 5-(4-(aminomethyl)-1 <i>H</i> -1,2,3,-triazol-1-yl)nicotinic acid | S19 |

*B. Synthetic intermediates and products.*

|             |                                                                                                                                    |     |
|-------------|------------------------------------------------------------------------------------------------------------------------------------|-----|
| Figure S16. | <sup>1</sup> H-NMR of <b>4</b> : 3-bromo-5-(4,5-dihydro-4,4-dimethyl-2-oxazolyl)-pyridine                                          | S20 |
| Figure S17  | <sup>1</sup> H-NMR of <b>5</b> : 1,2-bis(5-(4,4-dimethyl-4,5-dihydrooxazol-2-yl)-pyridin-3-yl)ethyne                               | S21 |
| Figure S18  | <sup>13</sup> C-NMR of <b>5</b> : 1,2-bis(5-(4,4-dimethyl-4,5-dihydrooxazol-2-yl)-pyridin-3-yl)ethyne                              | S22 |
| Figure S19  | <sup>1</sup> H-NMR: 4- <i>n</i> -butyl-3-(4,5-dihydro-4,4-dimethyl-2-oxazolyl)-pyridine                                            | S23 |
| Figure S20  | <sup>1</sup> H-NMR: 4-phenyl-3-(4,5-dihydro-4,4-dimethyl-2-oxazolyl)-pyridine                                                      | S24 |
| Figure S21  | <sup>1</sup> H-NMR of <b>6</b> : 4,4-dimethyl-2-(5-((triethylsilyl)ethynyl)pyridine-3-yl)-4,5-dihydrooxazole                       | S25 |
| Figure S22  | <sup>13</sup> C-NMR of <b>6</b> : 4,4-dimethyl-2-(5-((triethylsilyl)ethynyl)pyridine-3-yl)-4,5-dihydrooxazole                      | S26 |
| Figure S23  | <sup>1</sup> H-NMR: 5-ethynyl-3-(4,5-dihydro-4,4-dimethyl-2-oxazolyl)-pyridine; precursor of 5-ethylnicotinic acid ( <b>3e</b> ).  | S27 |
| Figure S24  | <sup>13</sup> C-NMR: 5-ethynyl-3-(4,5-dihydro-4,4-dimethyl-2-oxazolyl)-pyridine; precursor of 5-ethylnicotinic acid ( <b>3e</b> ). | S28 |
| Figure S25  | <sup>1</sup> H-NMR of <b>8</b> : pinacol ester of 5-(4,5-dihydro-4,4-dimethyl-2-oxazolyl)-3-pyridinyl boronic                      | S29 |

|                                  |                                    |                                                                    |     |
|----------------------------------|------------------------------------|--------------------------------------------------------------------|-----|
|                                  |                                    | acid (pinacol ester 8)                                             |     |
| Figure S26                       | <sup>1</sup> H-NMR of <b>9</b> :   | 5-phenyl-3-(4,5-dihydro-4,4-dimethyl-2-oxazolyl)-pyridine          | S30 |
| Figure S27                       | <sup>13</sup> C-NMR of <b>9</b> :  | 5-phenyl-3-(4,5-dihydro-4,4-dimethyl-2-oxazolyl)-pyridine          | S31 |
| Figure S28                       | <sup>1</sup> H-NMR of <b>10</b> :  | 5-aminonicotinic acid ethyl ester                                  | S32 |
| Figure S29                       | <sup>13</sup> C-NMR of <b>10</b> : | 5-aminonicotinic acid ethyl ester                                  | S33 |
| Figure S30                       | <sup>1</sup> H-NMR of <b>11</b> :  | 5-azidonicotinic acid ethyl ester                                  | S34 |
| Figure S31                       | <sup>13</sup> C-NMR of <b>11</b> : | 5-azidonicotinic acid ethyl ester                                  | S35 |
| Figure S32                       | <sup>1</sup> H-NMR of <b>14</b> :  | ethyl 5-(4-(aminomethyl)-1 <i>H</i> -1,2,3-triazol-1-yl)nicotinate | S36 |
| Figure S33                       | <sup>13</sup> C-NMR of <b>14</b> : | ethyl 5-(4-(aminomethyl)-1 <i>H</i> -1,2,3-triazol-1-yl)nicotinate | S37 |
| Figure S34                       | <sup>1</sup> H-NMR:                | 4-aminonicotinic acid methyl ester                                 | S38 |
| Figure S35                       | <sup>13</sup> C-NMR:               | 4-aminonicotinic acid methyl ester                                 | S39 |
| <i>C. Pyridine dinucleotides</i> |                                    |                                                                    |     |
| Figure S36.                      | <sup>1</sup> H-NMR of <b>15</b> :  | 4-aminonicotinic acid methyl ester adenine dinucleotide phosphate  | S40 |
| Figure S37.                      | <sup>31</sup> P-NMR of <b>2c</b> : | 4-aminonicotinic acid methyl ester adenine dinucleotide phosphate  | S41 |
| Figure S38.                      | <sup>1</sup> H-NMR of <b>16</b> :  | 4-amino-NAADP                                                      | S42 |
| Figure S39.                      | <sup>31</sup> P-NMR of <b>16</b> : | 4-amino-NAADP                                                      | S43 |
| Figure S40.                      | <sup>1</sup> H-NMR of <b>17</b> :  | 4-methyl-NAADP                                                     | S44 |
| Figure S41.                      | <sup>31</sup> P-NMR of <b>17</b> : | 4-methyl-NAADP                                                     | S45 |
| Figure S42.                      | <sup>1</sup> H-NMR of <b>18</b> :  | 4- <i>n</i> -butyl-NAADP                                           | S46 |
| Figure S43.                      | <sup>1</sup> H-NMR of <b>19</b> :  | 4-phenyl-NAADP                                                     | S47 |

|                                                                |     |
|----------------------------------------------------------------|-----|
| Figure S44. <sup>31</sup> P-NMR of <b>19</b> : 4-phenyl-NAADP  | S48 |
| Figure S45. <sup>1</sup> H-NMR of <b>20</b> : 5-amino-NAADP    | S49 |
| Figure S46. <sup>31</sup> P-NMR of <b>20</b> : 5-amino-NAADP   | S50 |
| Figure S47. <sup>1</sup> H-NMR of <b>21</b> : 5-methyl-NAADP   | S51 |
| Figure S48. <sup>31</sup> P-NMR of <b>21</b> : 5-methyl-NAADP  | S52 |
| Figure S49. <sup>1</sup> H-NMR of <b>22</b> : 5-carboxy-NAADP  | S53 |
| Figure S50. <sup>31</sup> P-NMR of <b>22</b> : 5-carboxy-NAADP | S54 |
| Figure S51. <sup>1</sup> H-NMR of <b>23</b> : 5-ethyl-NAADP    | S55 |
| Figure S52. <sup>31</sup> P-NMR of <b>23</b> : 5-ethyl-NAADP   | S56 |
| Figure S53. <sup>1</sup> H-NMR of <b>24</b> : 5-azido-NAADP    | S57 |
| Figure S54. <sup>31</sup> P-NMR of <b>24</b> : 5-azido-NAADP   | S58 |
| References                                                     | S59 |

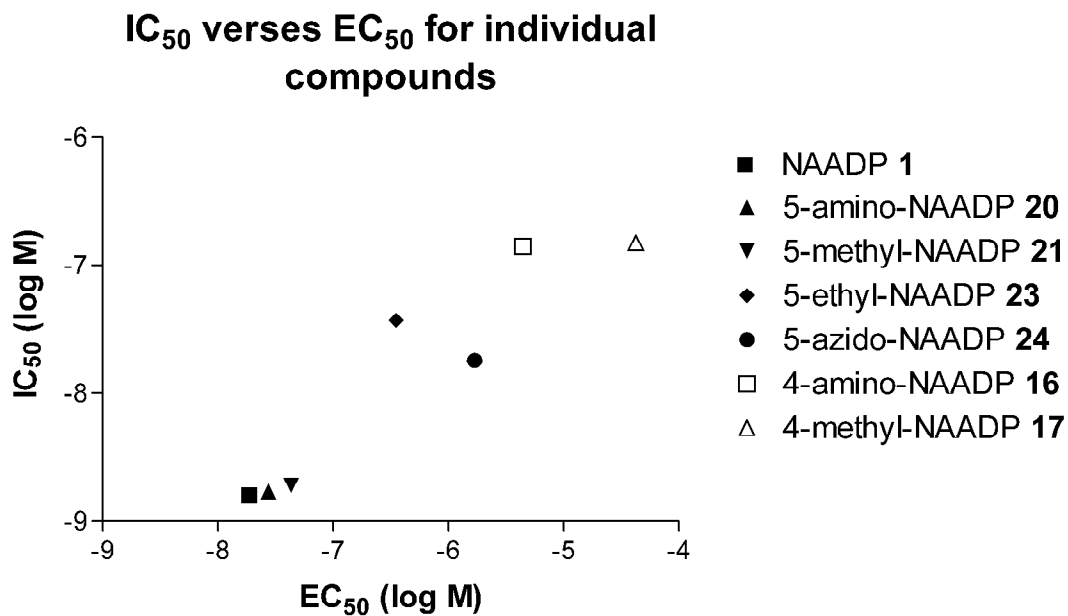

Figure S1. Scatter plot of the IC<sub>50</sub> values derived from competition ligand binding (Table 4)(Y-axis) versus the EC<sub>50</sub> values derived from Ca<sup>2+</sup> release (Table 3)(X-axis).

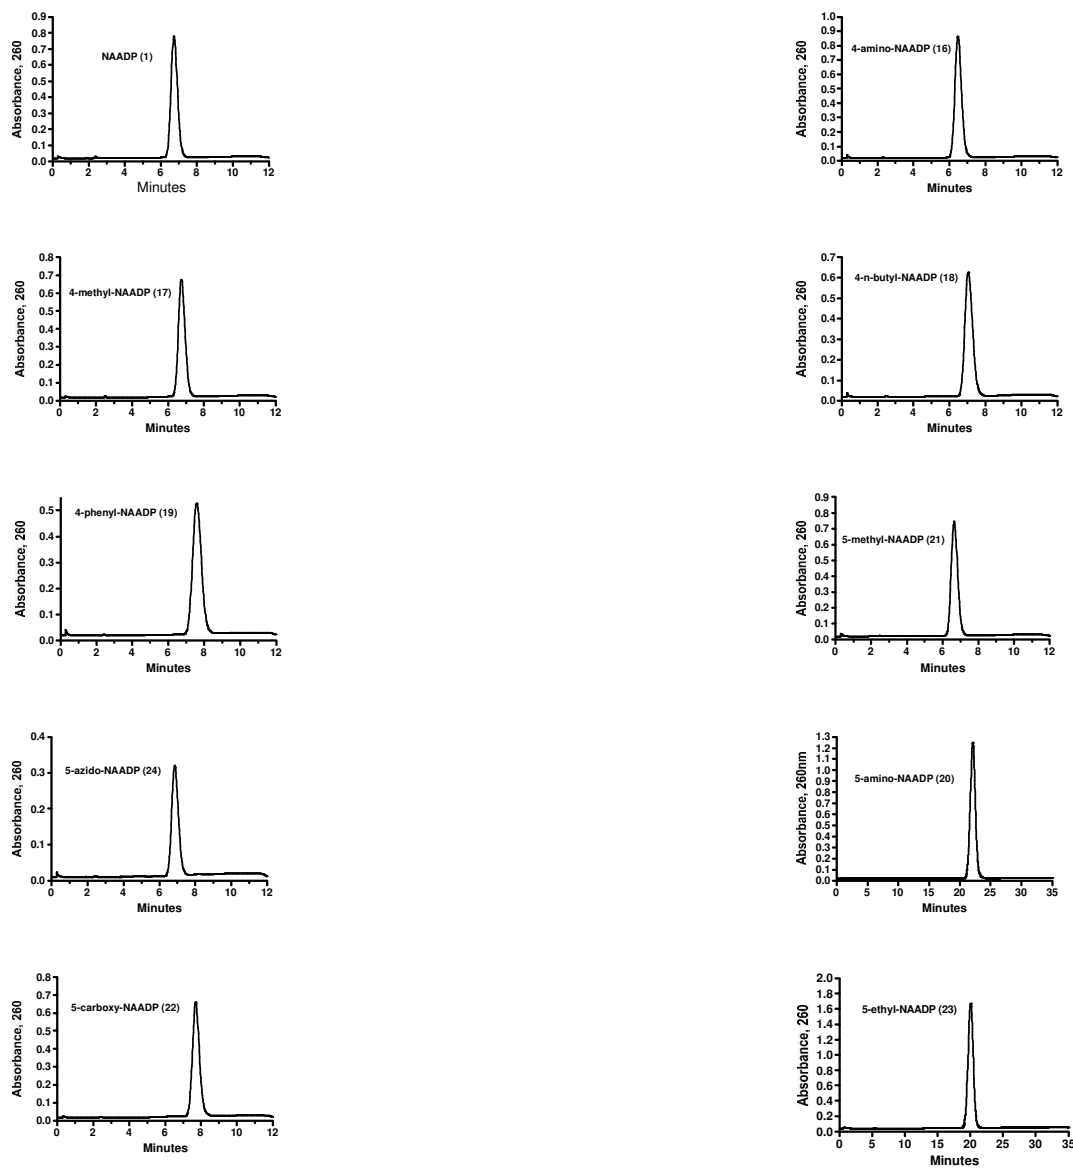

Figure S2. HPLC of NAADP and its analogs **16 – 24**. Compounds were examined using high pressure liquid chromatography (HPLC) on a  $4.6 \times 50$  mm column packed with AG MP-1 macroporus anion exchange resin (BioRad Laboratories) with the chromatography developed at 1 mL/min using a mobile phase of 0 – 75 mM trifluoroacetic acid in water<sup>1</sup> immediately prior to testing.

Figure S3.  $^1\text{H-NMR}$  (400 MHz,  $\text{CD}_3\text{OD}$ ) 4-*n*-butylnicotinic acid

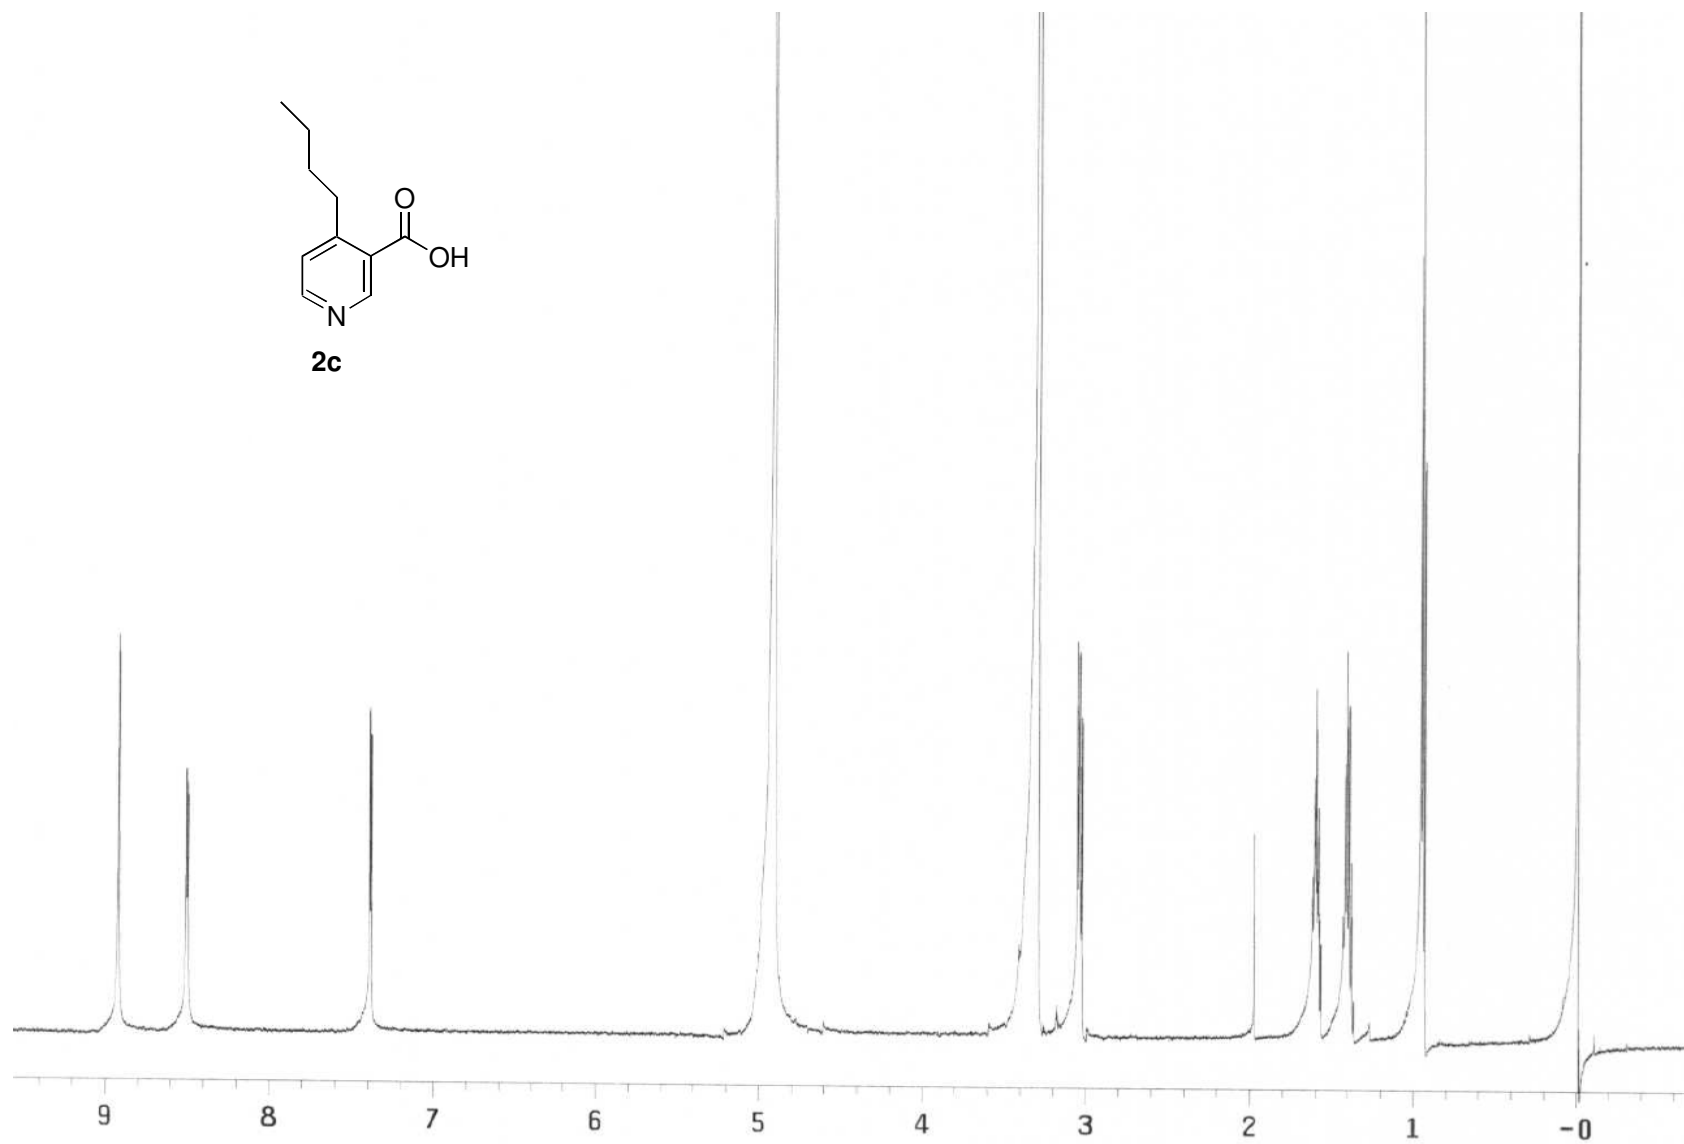

Figure S4. <sup>1</sup>H-NMR (400 MHz, CDCl<sub>3</sub>) 4-phenylnicotinic acid.

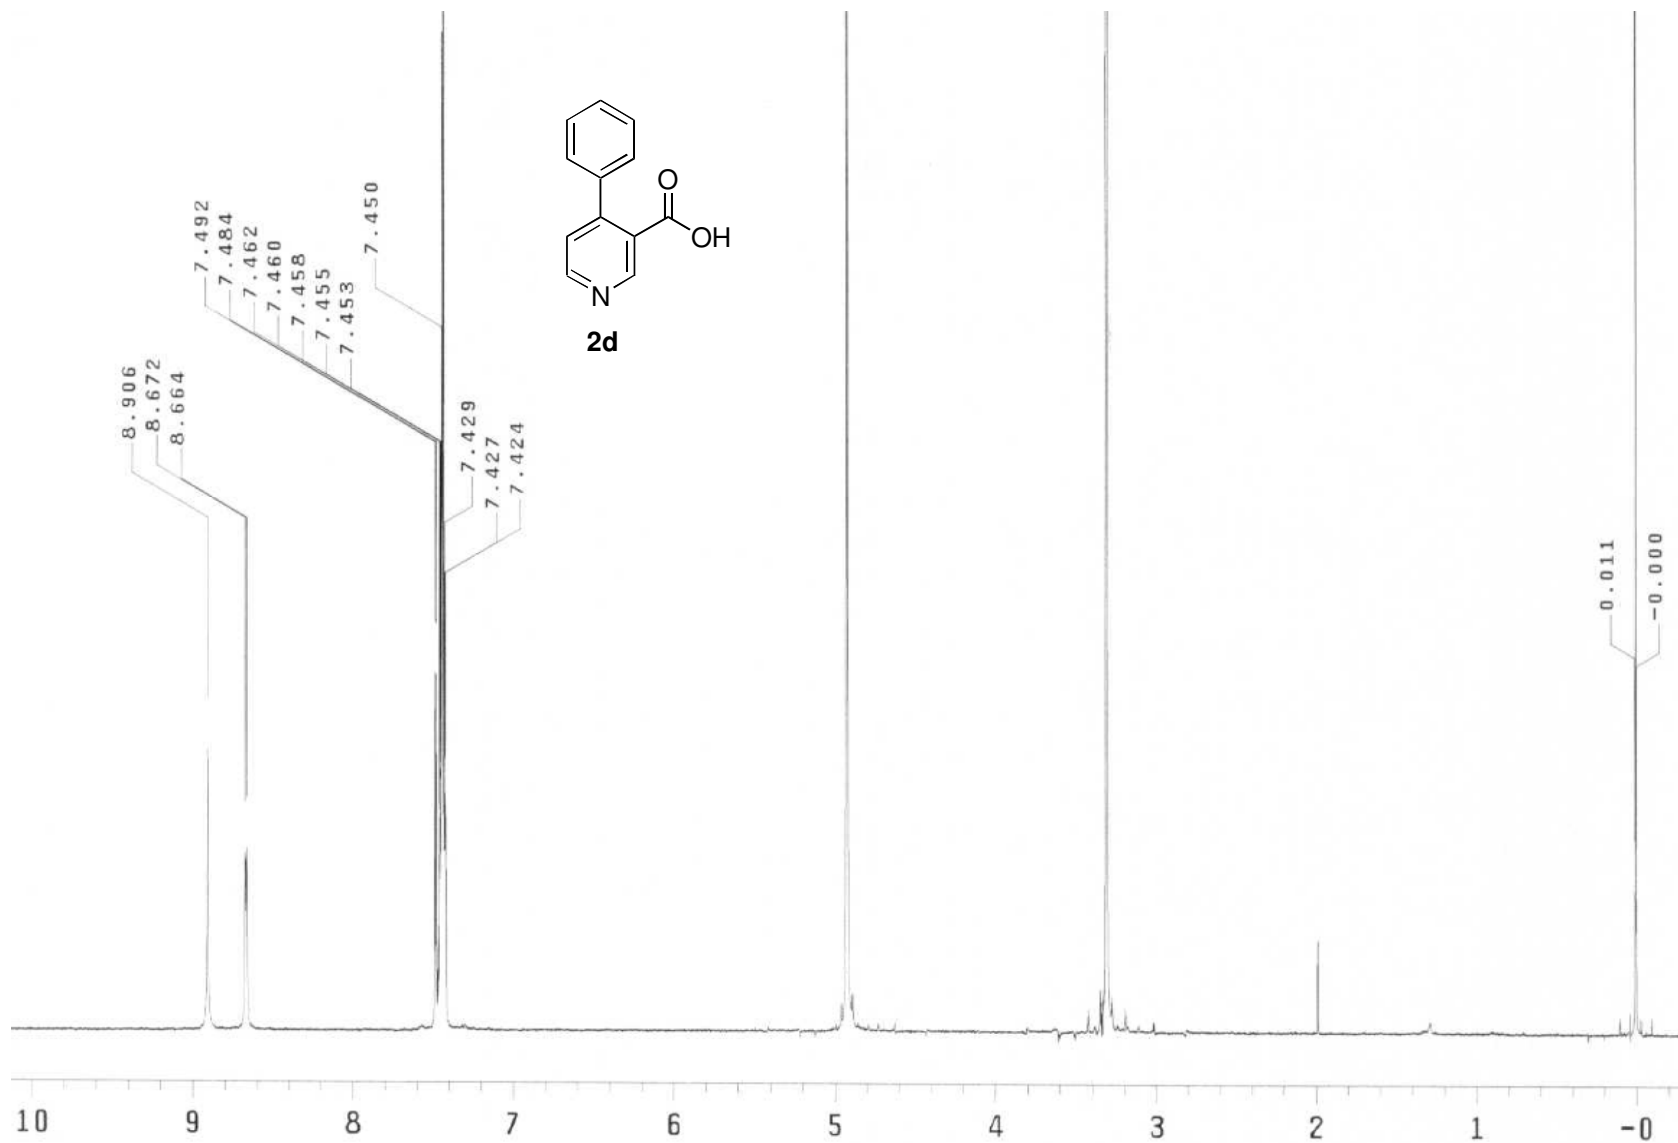



Figure S5.  $^1\text{H-NMR}$  (400 MHz,  $\text{CD}_3\text{OD}$ ) 5-ethynynicotinic acid (**3e**).

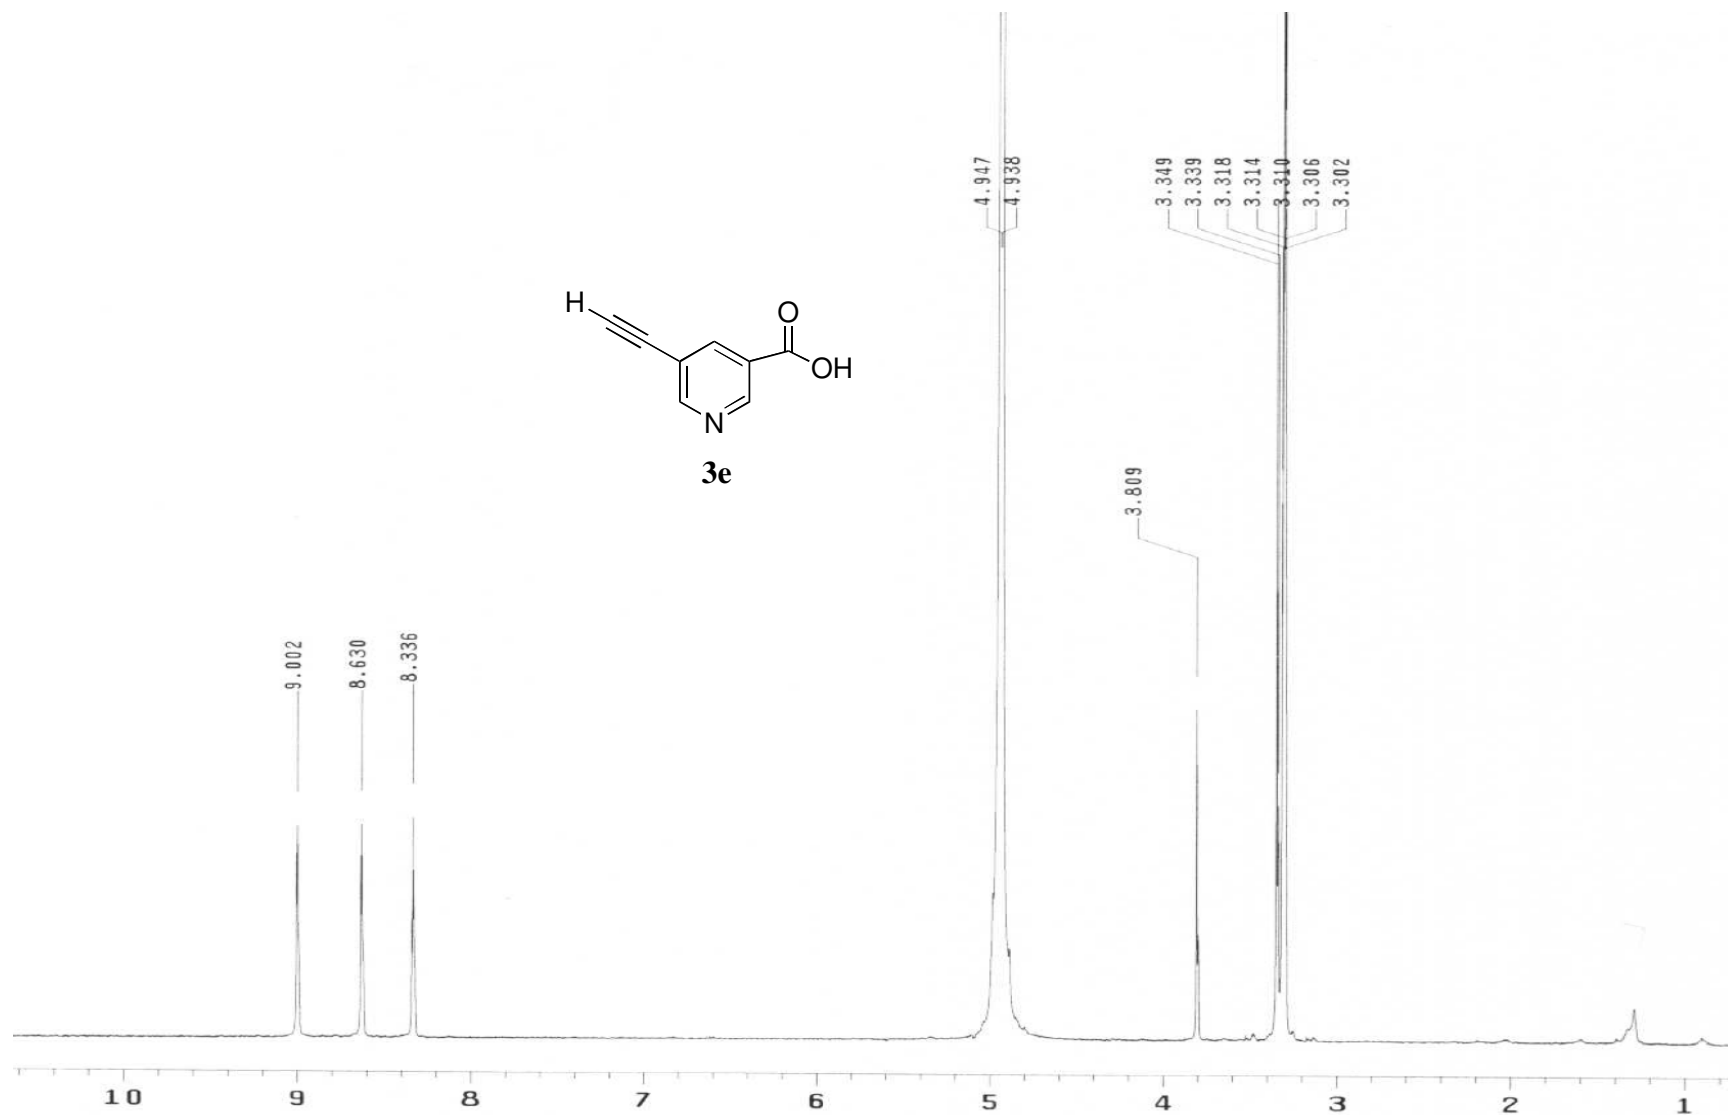

Figure S6.  $^{13}\text{C}$ -NMR ( $\text{CD}_3\text{OD}$ ) 5-ethynynicotinic acid (**3e**).

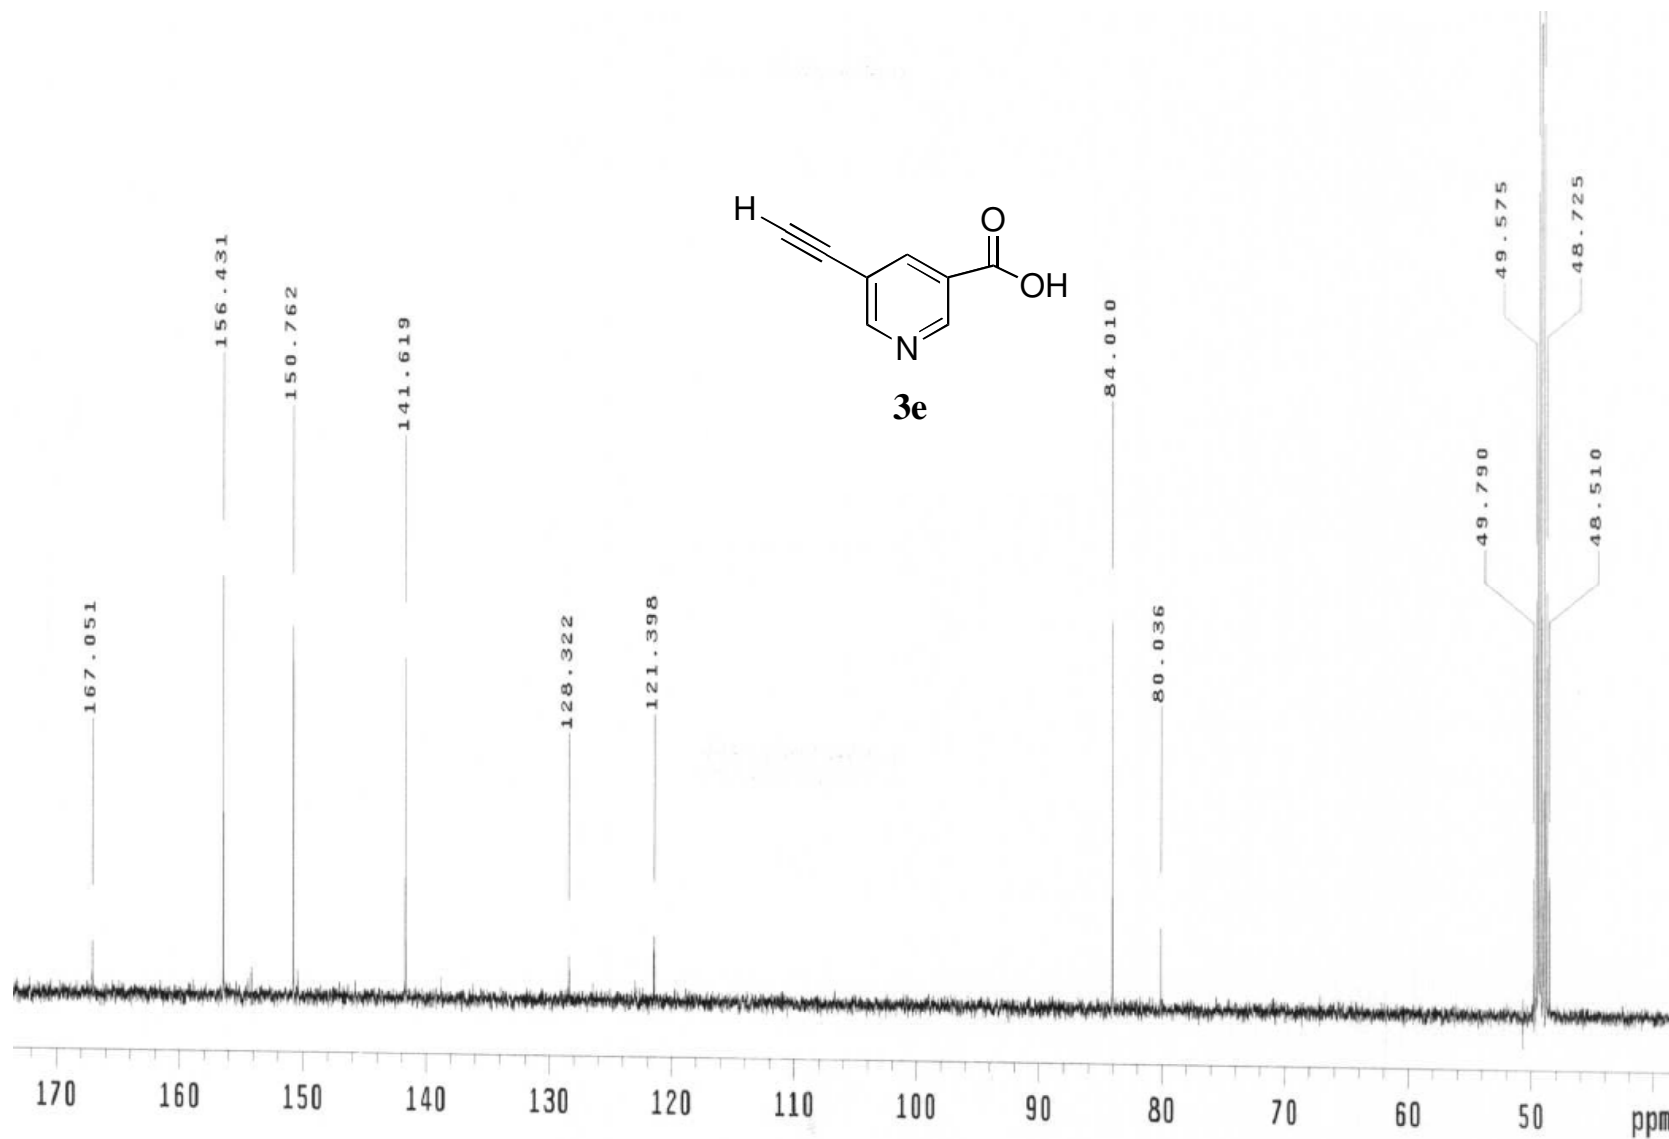

Figure S7.  $^1\text{H-NMR}$  of **3f**: 5-ethenylnicotinic acid

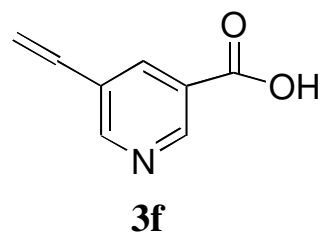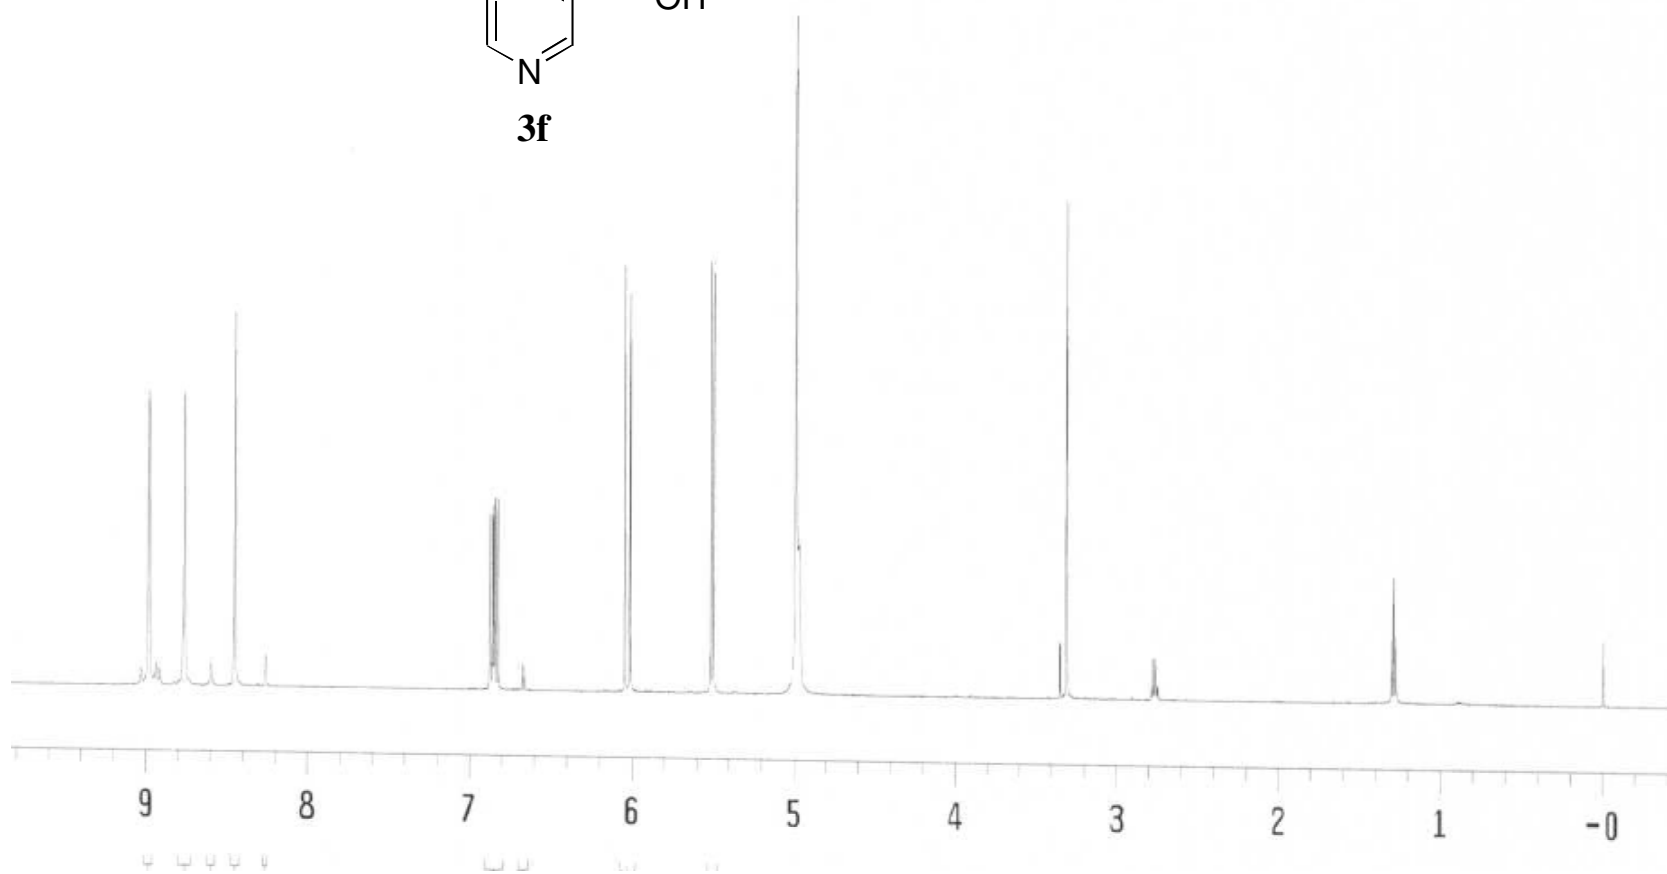

Figure S8.  $^{13}\text{C}$ -NMR of **3f**: 5-ethynynicotinic acid

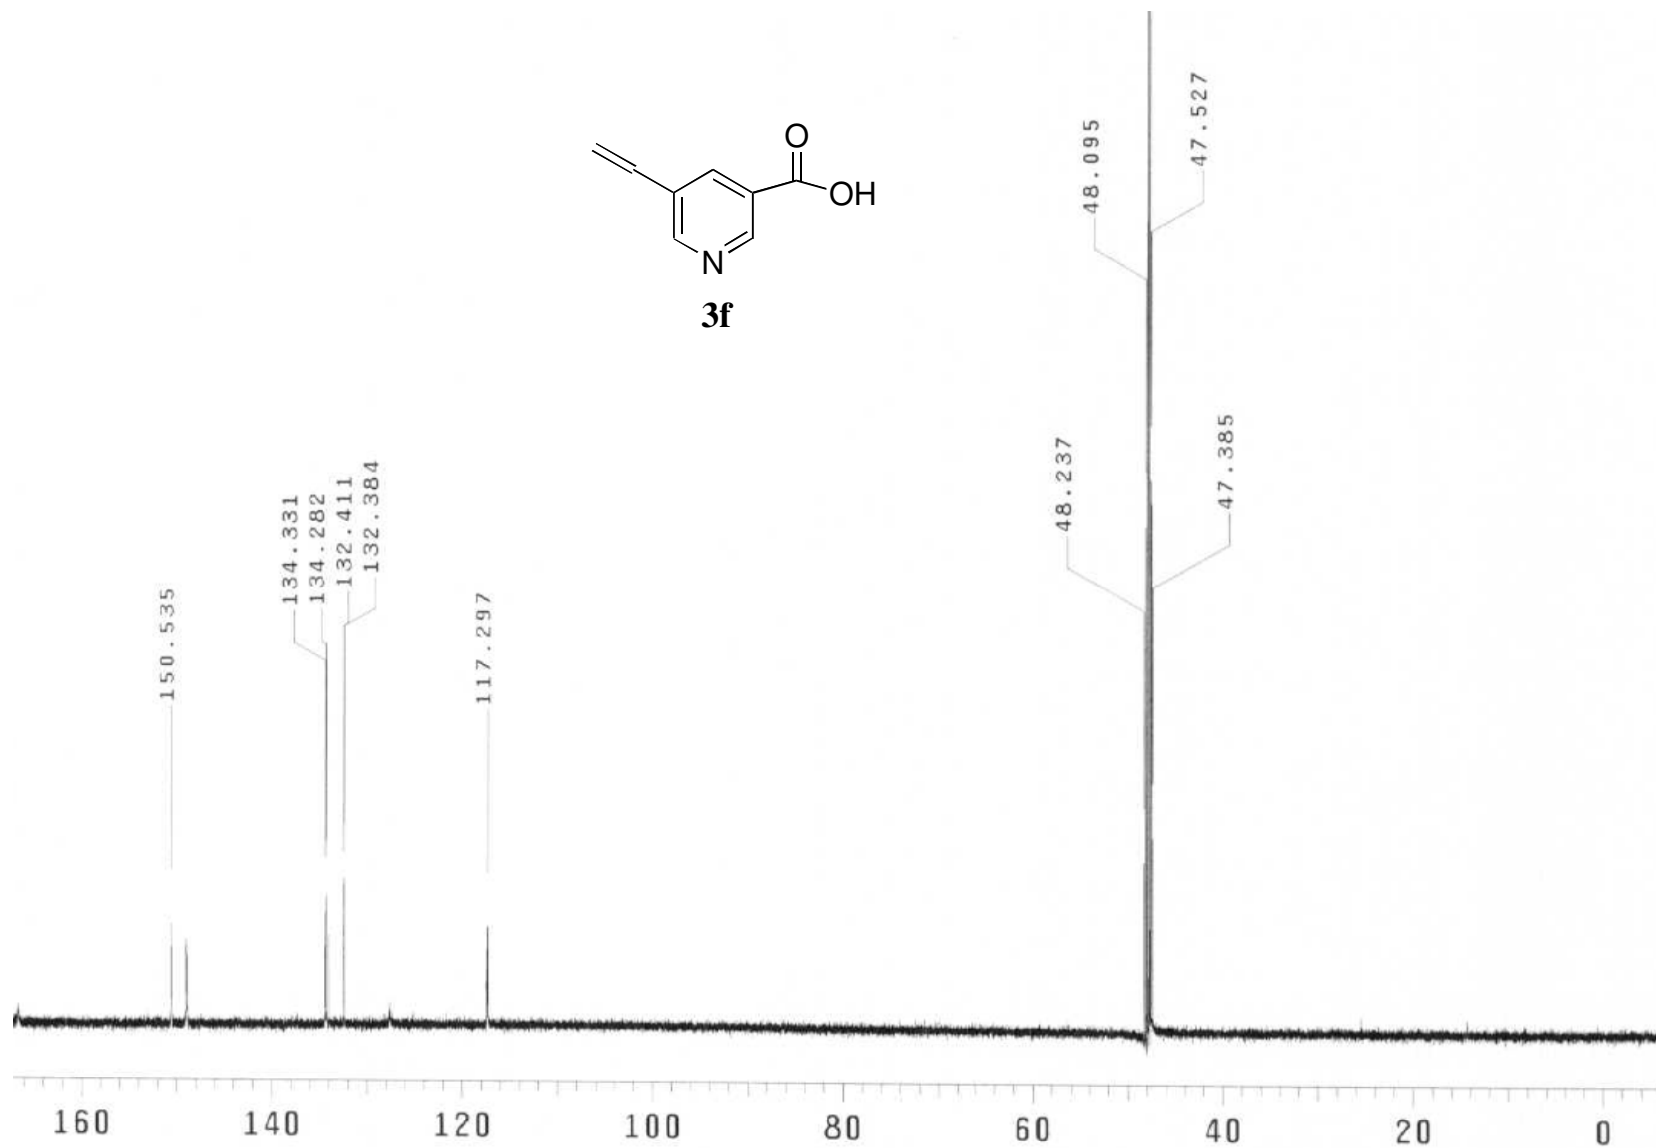

Figure S9. <sup>1</sup>H-NMR of **3g**: 5-ethylnicotinic acid

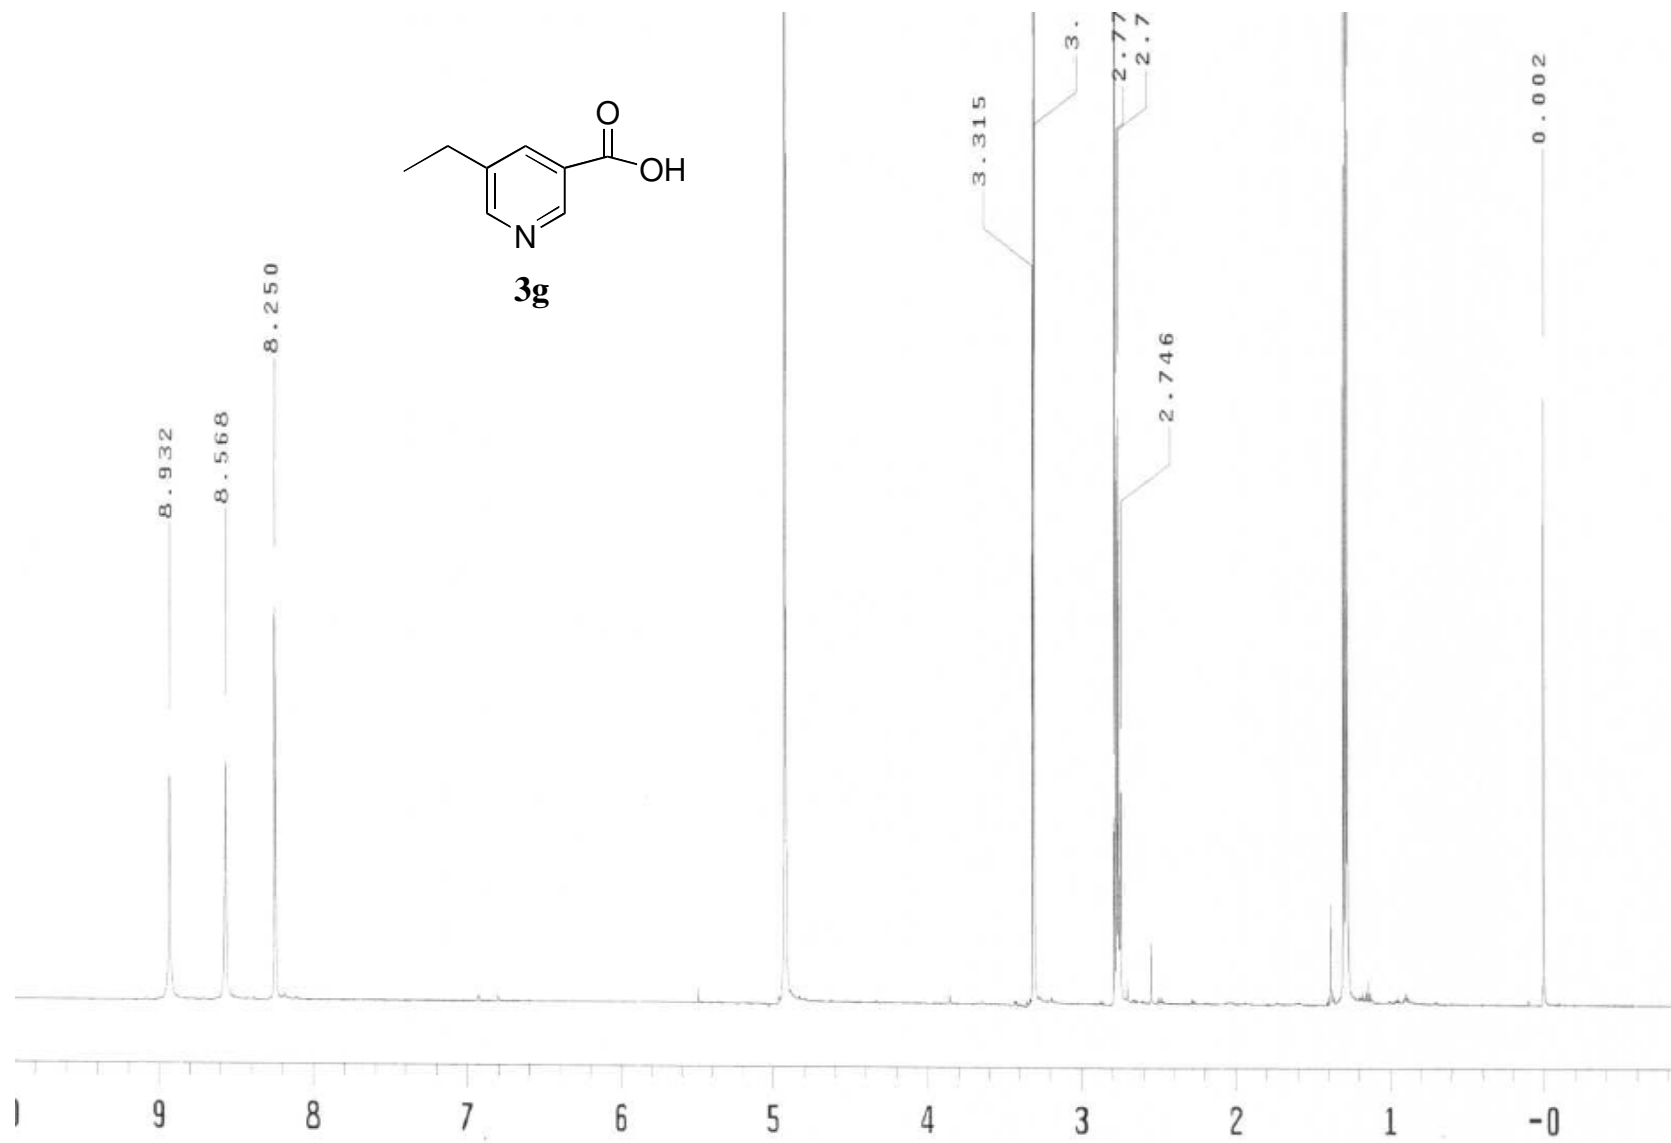

Figure S10.  $^{13}\text{C}$ -NMR of **3g**: 5-ethylnicotinic acid

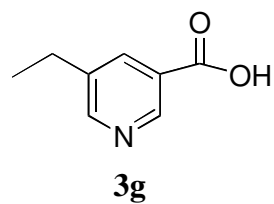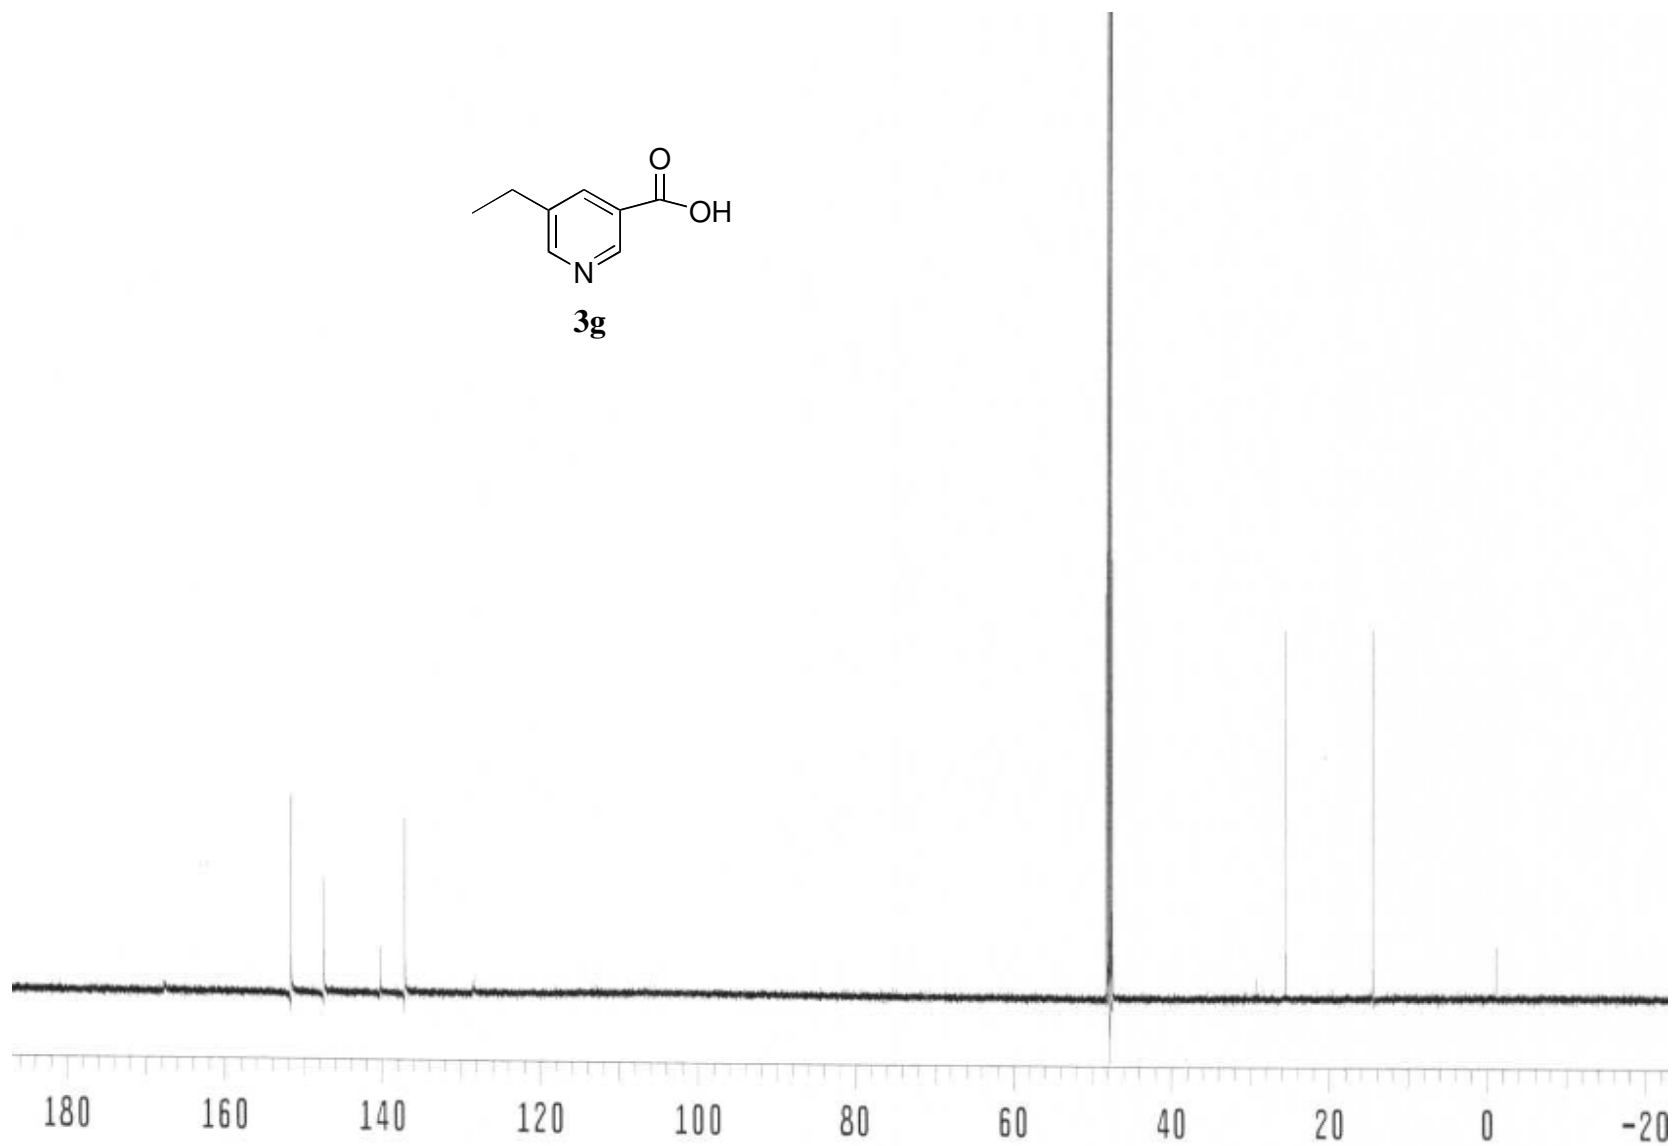

Figure S11. <sup>1</sup>H-NMR of **3h**: 5-phenylnicotinic acid

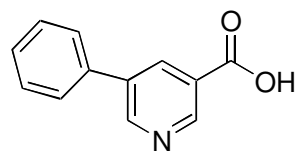

**3h**

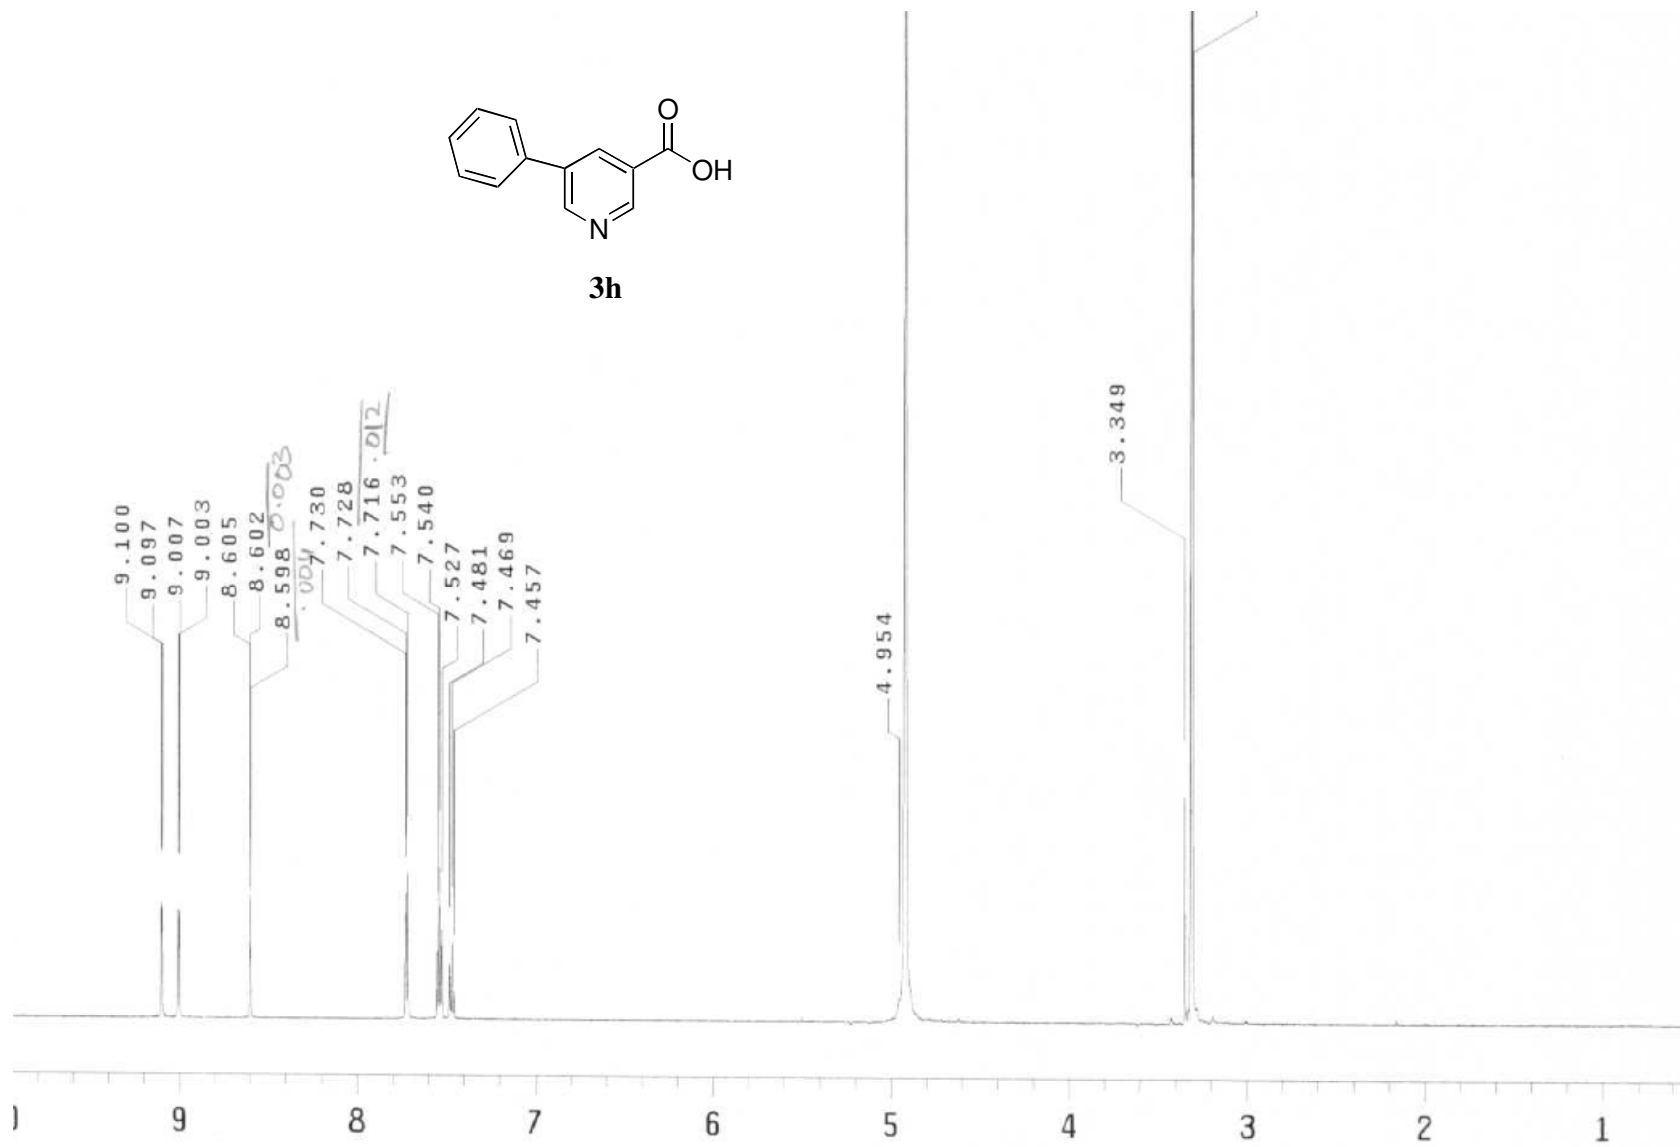

Figure S12.  $^{13}\text{C}$ -NMR of **3h**: 5-phenylnicotinic acid

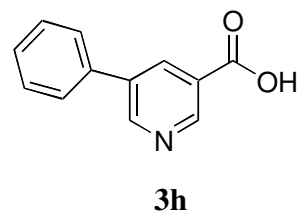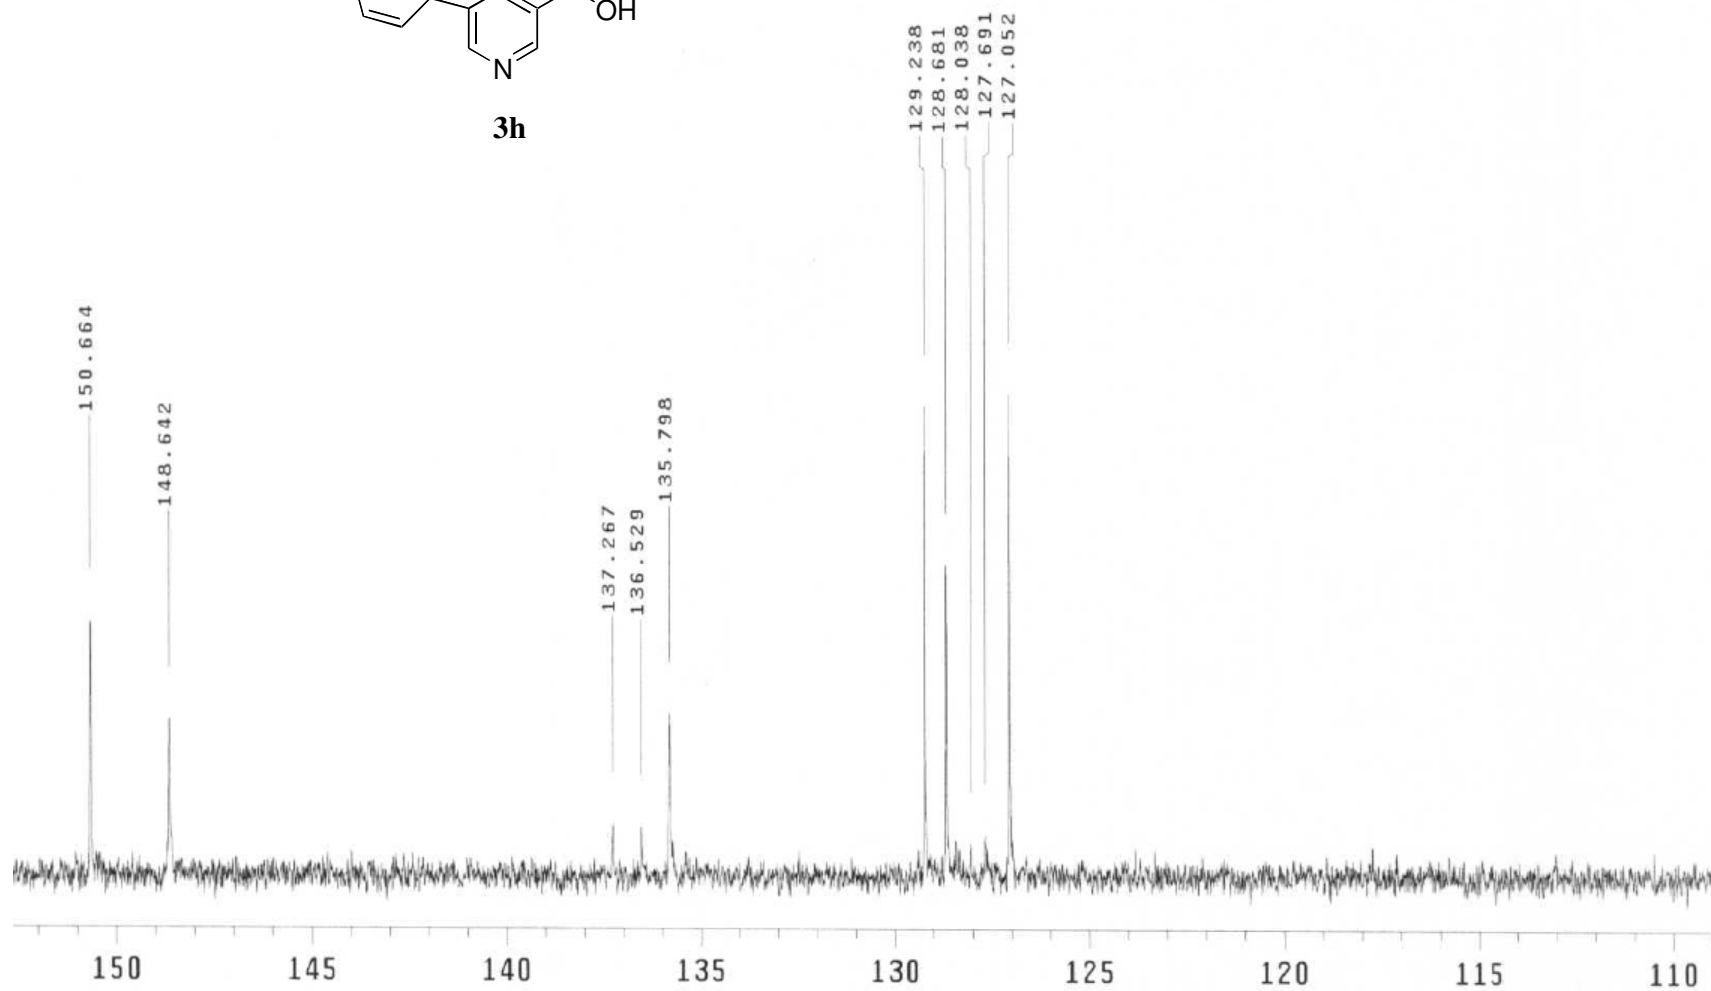



Figure S13. <sup>1</sup>H-NMR of **3i**: 5-azidonicotinic acid

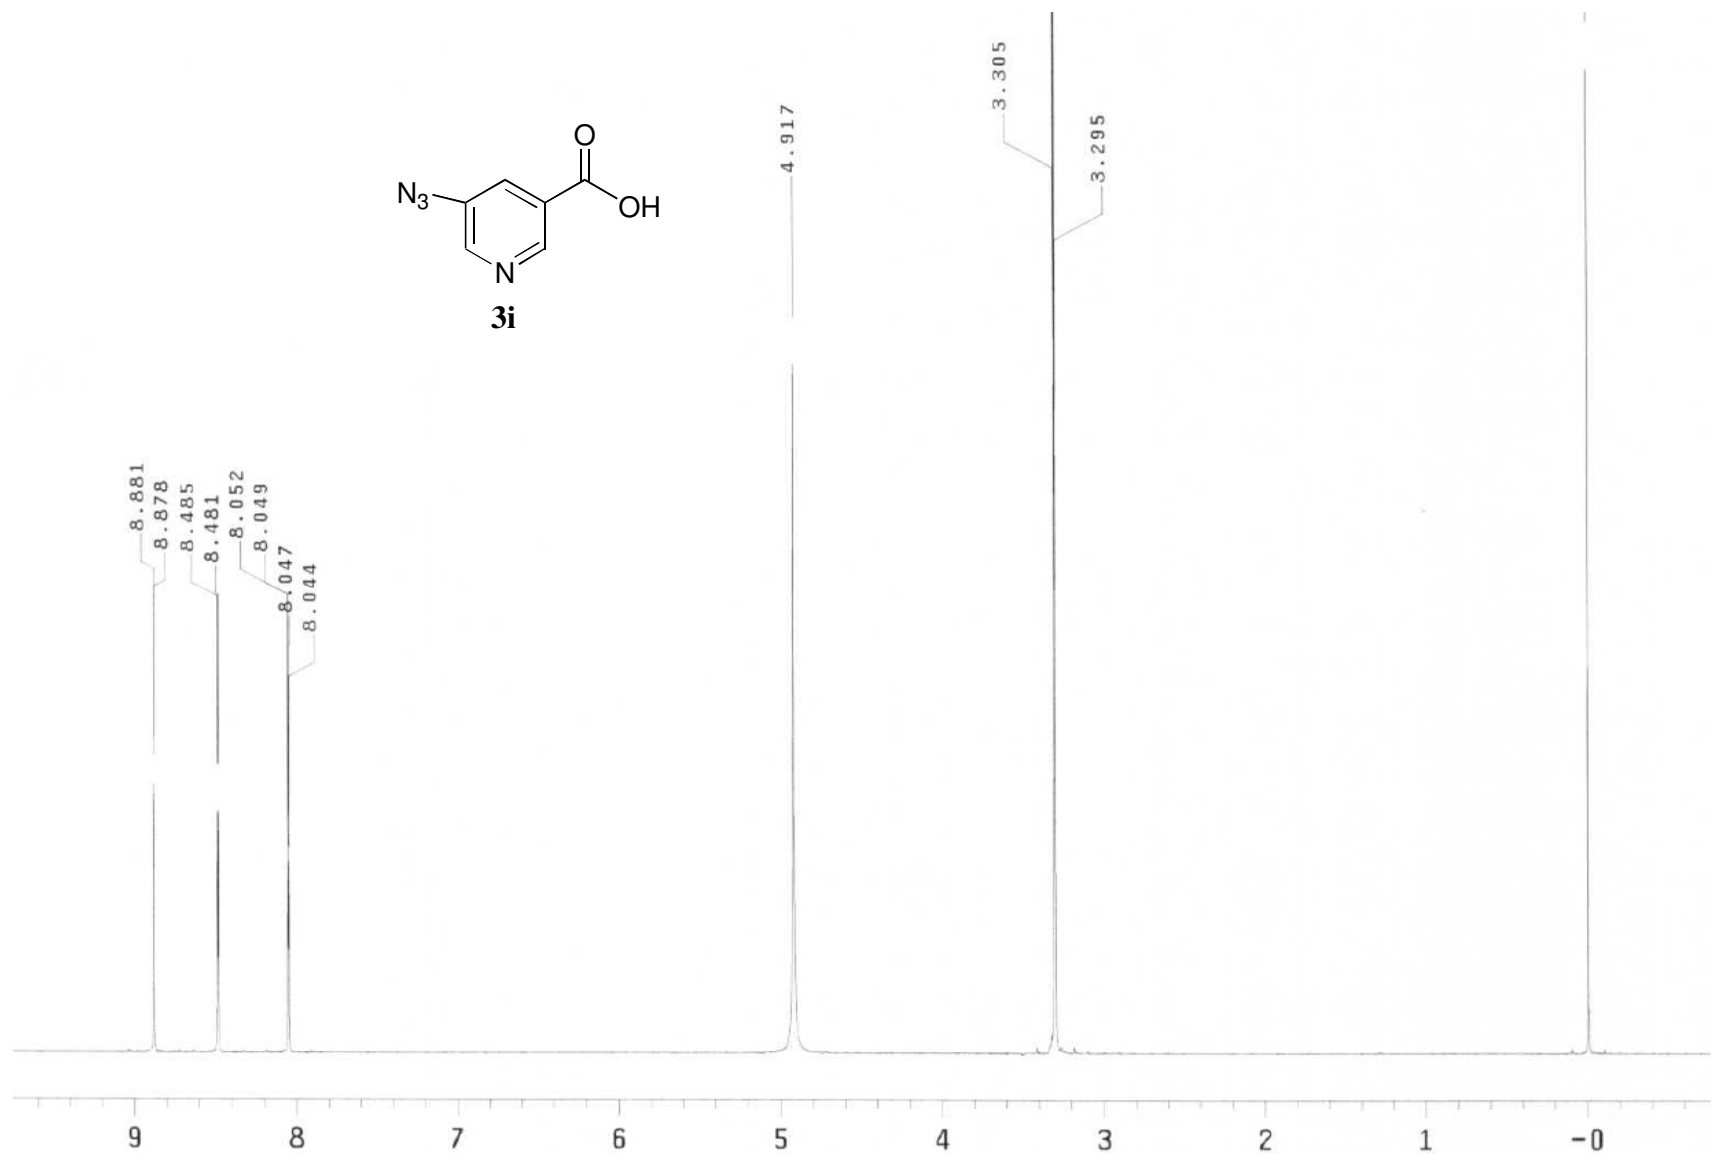

Figure S14.  $^{13}\text{C}$ -NMR of **3i**: 5-azidonicotinic acid

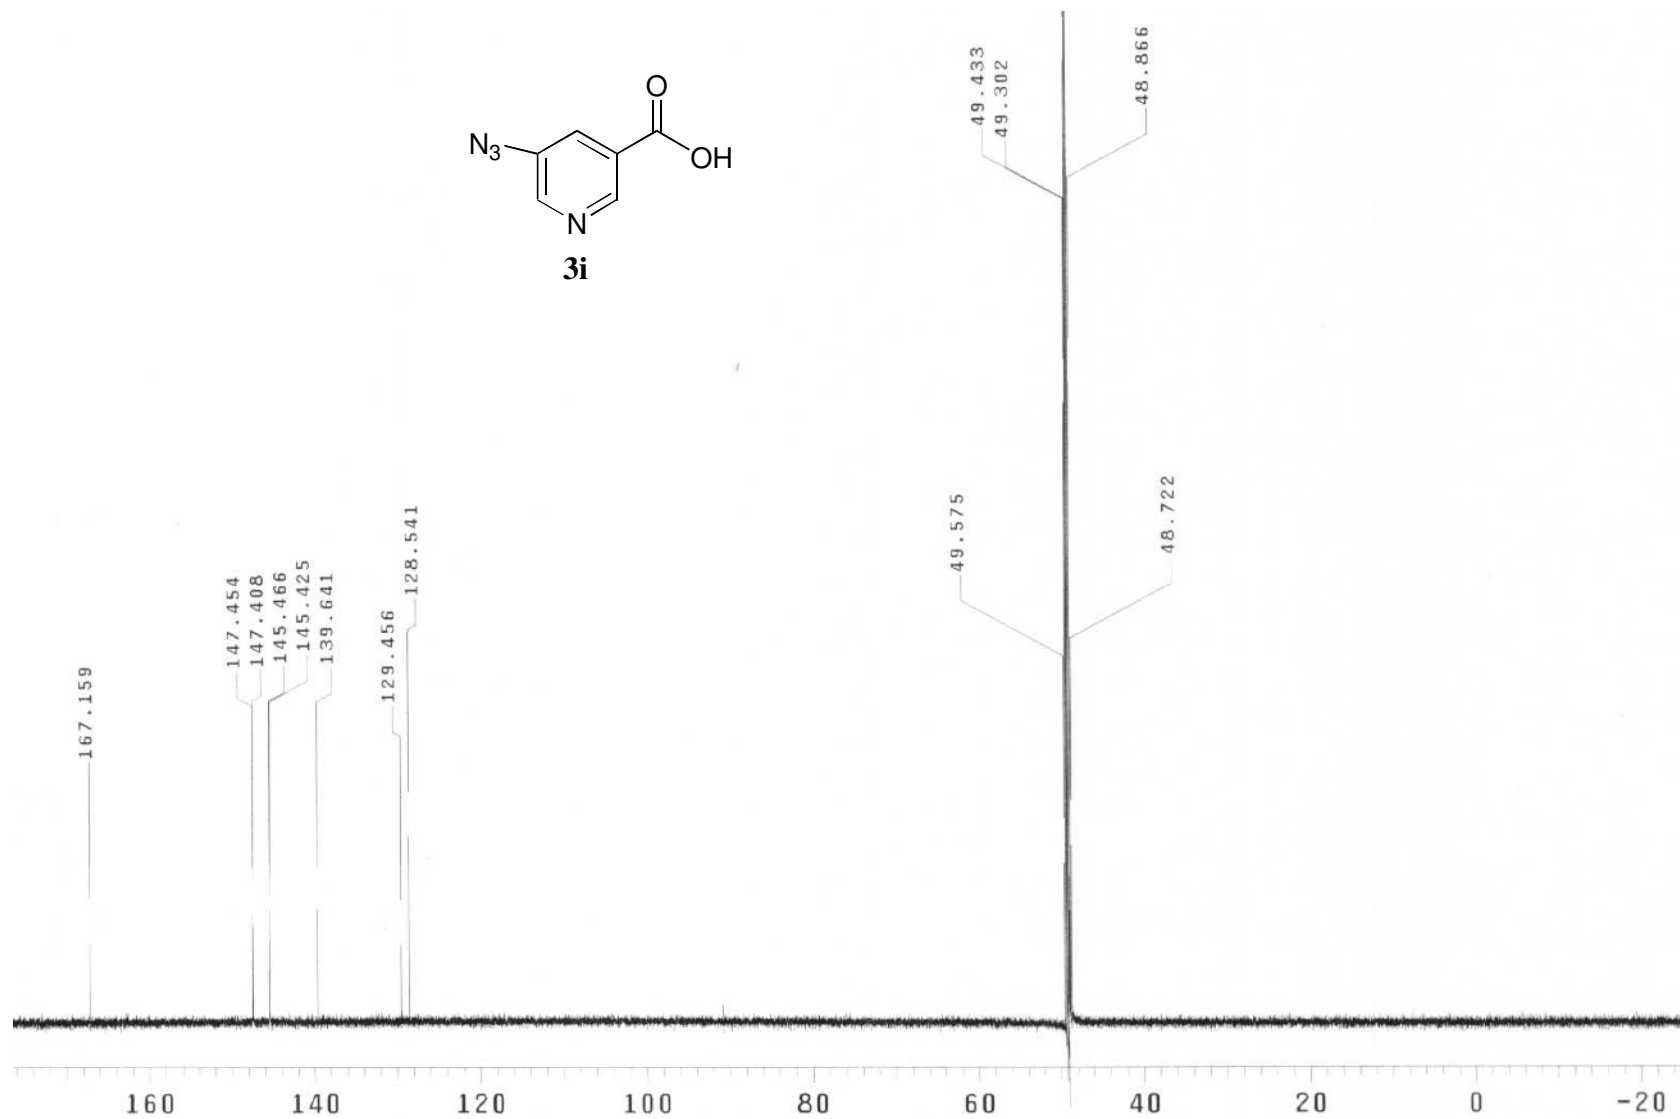

Figure S15. <sup>1</sup>H-NMR of **3j**: 5-(4-(aminomethyl)-1H-1,2,3,-triazol-1-yl)nicotinic acid

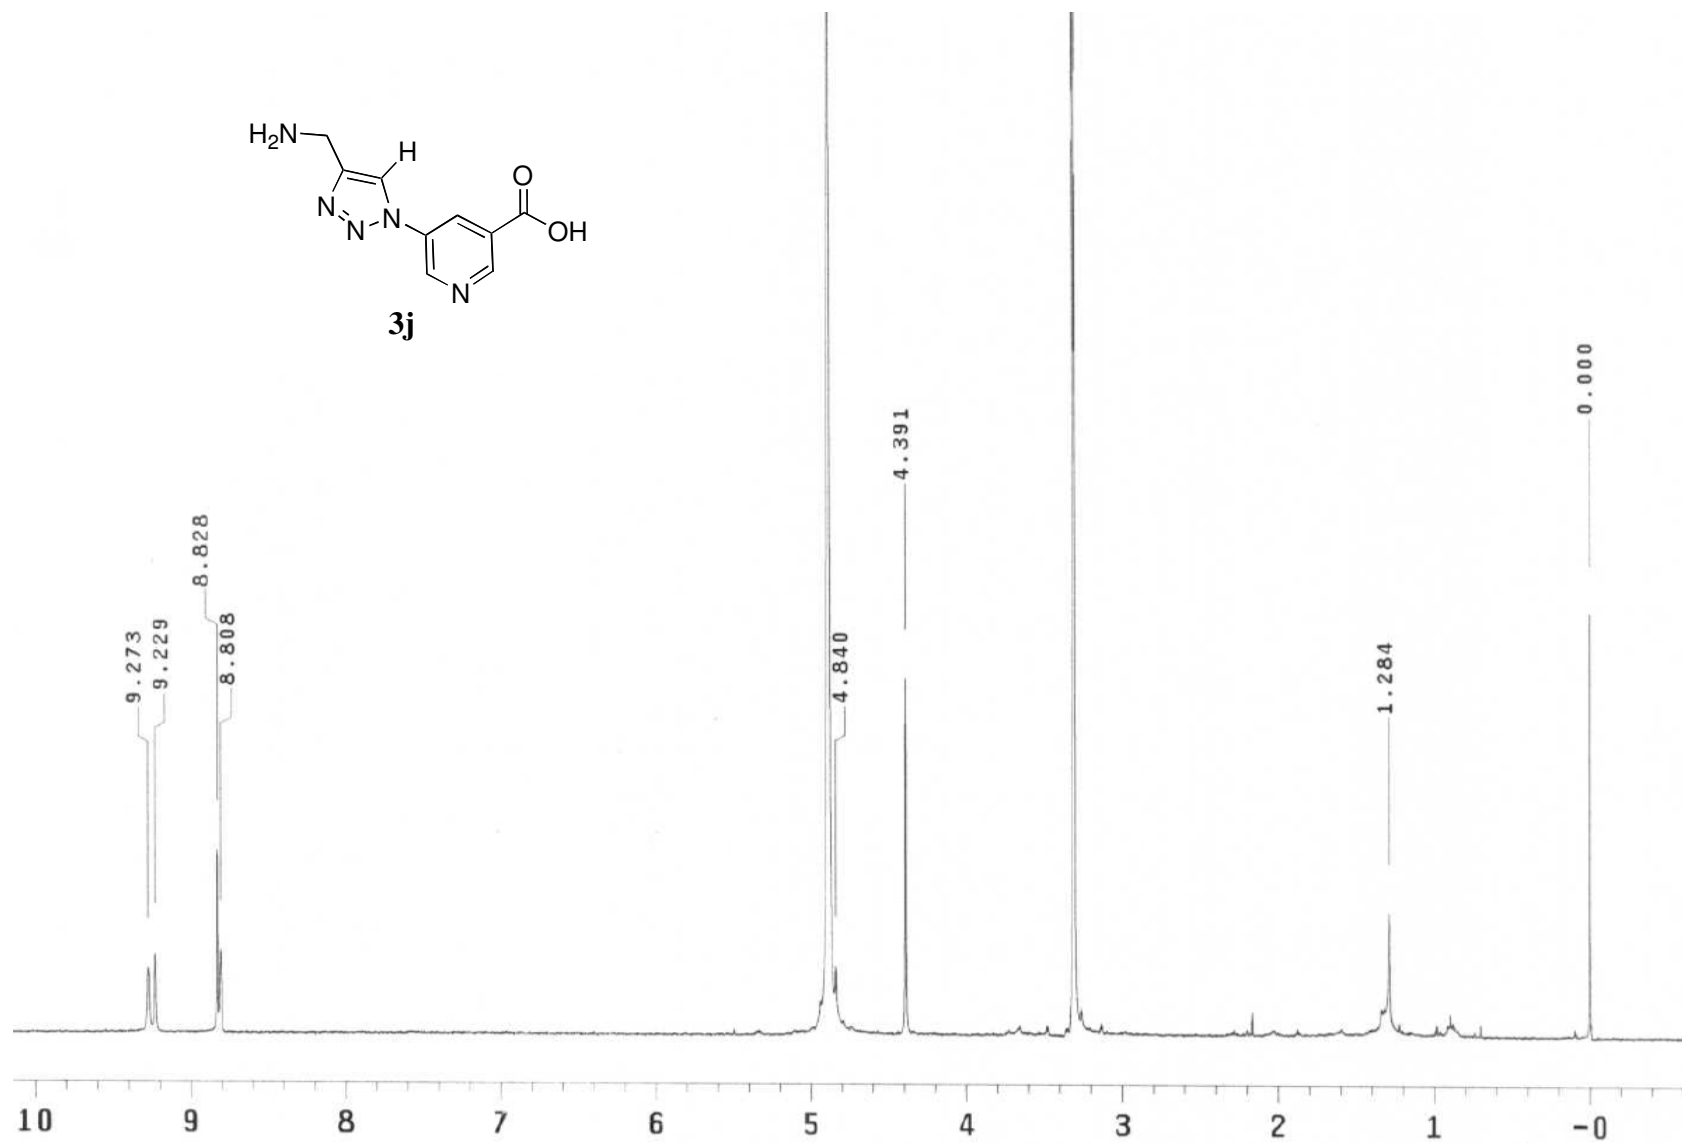

Figure S16. <sup>1</sup>H-NMR of **4**: 3-bromo-5-(4,5-dihydro-4,4-dimethyl-2-oxazolyl)-pyridine

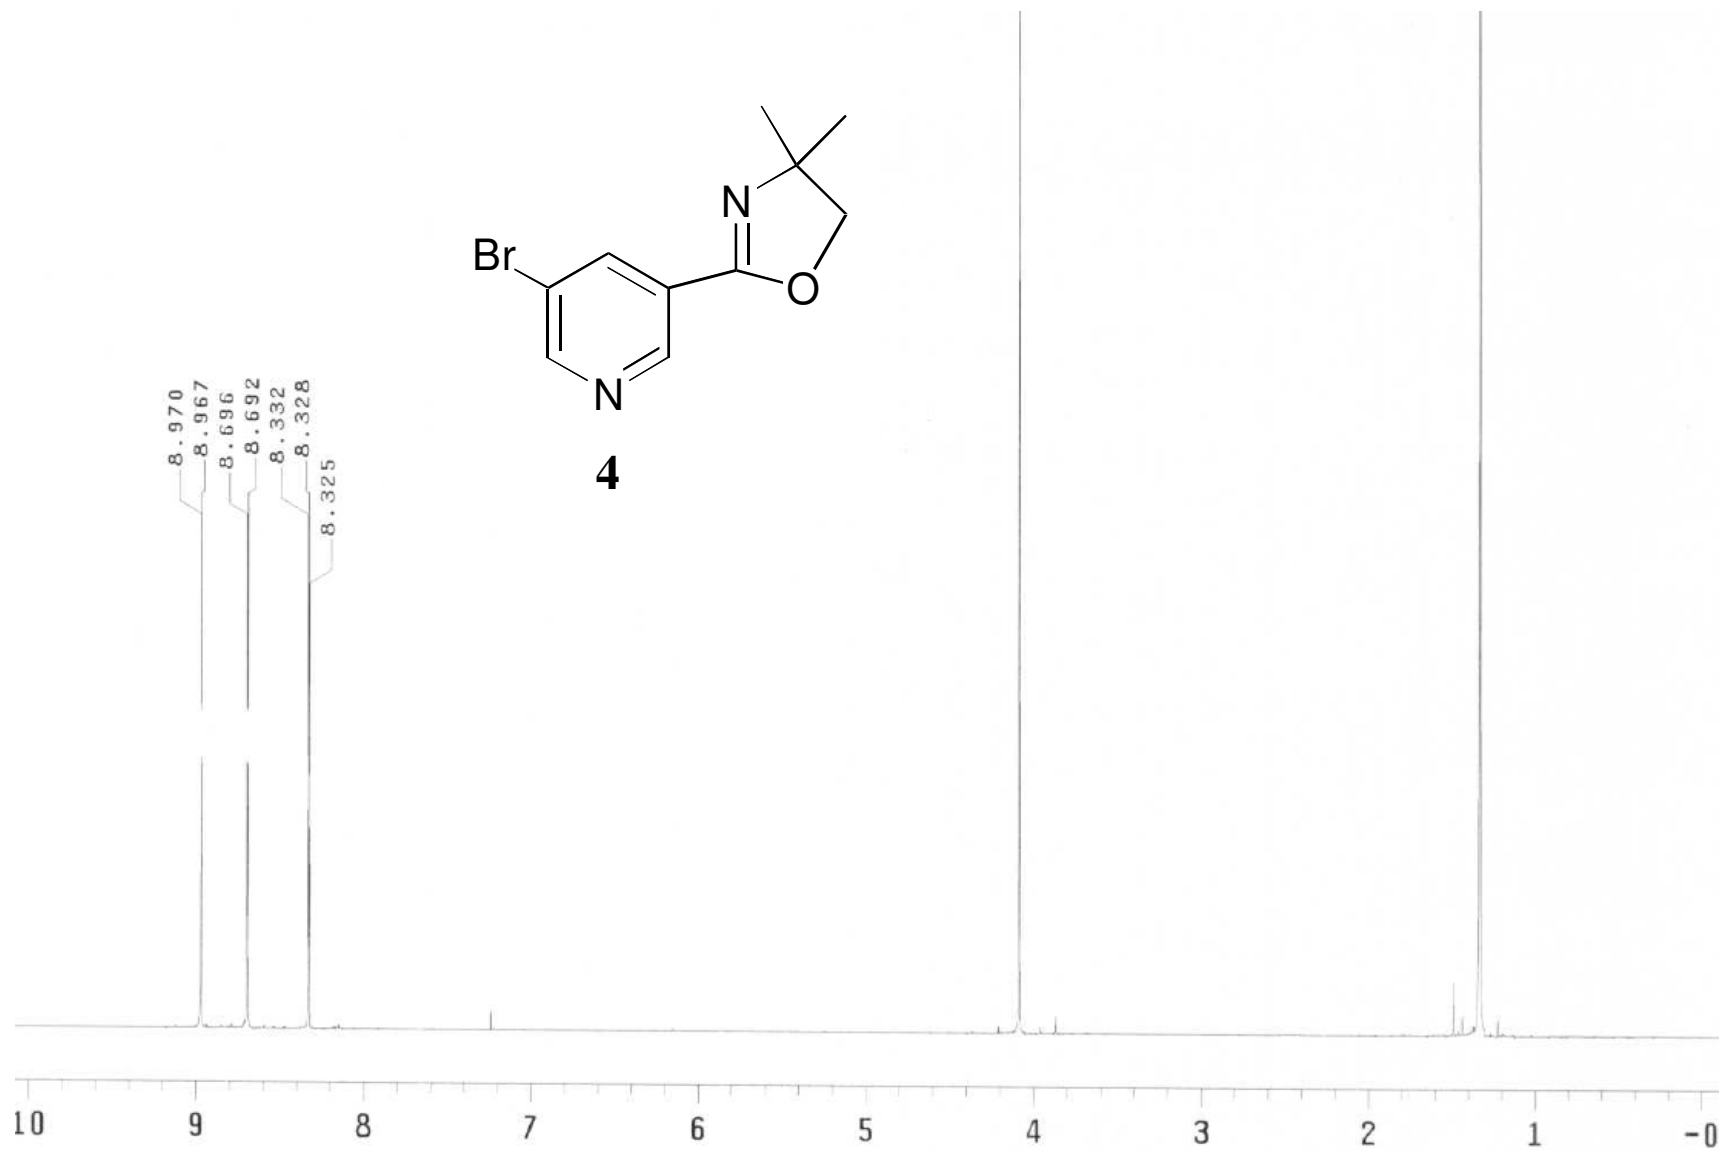

Figure S17 <sup>1</sup>H-NMR of **5**: 1,2-bis(5-(4,4-dimethyl-4,5-dihydrooxazol-2-yl)-pyridin-3-yl)ethyne

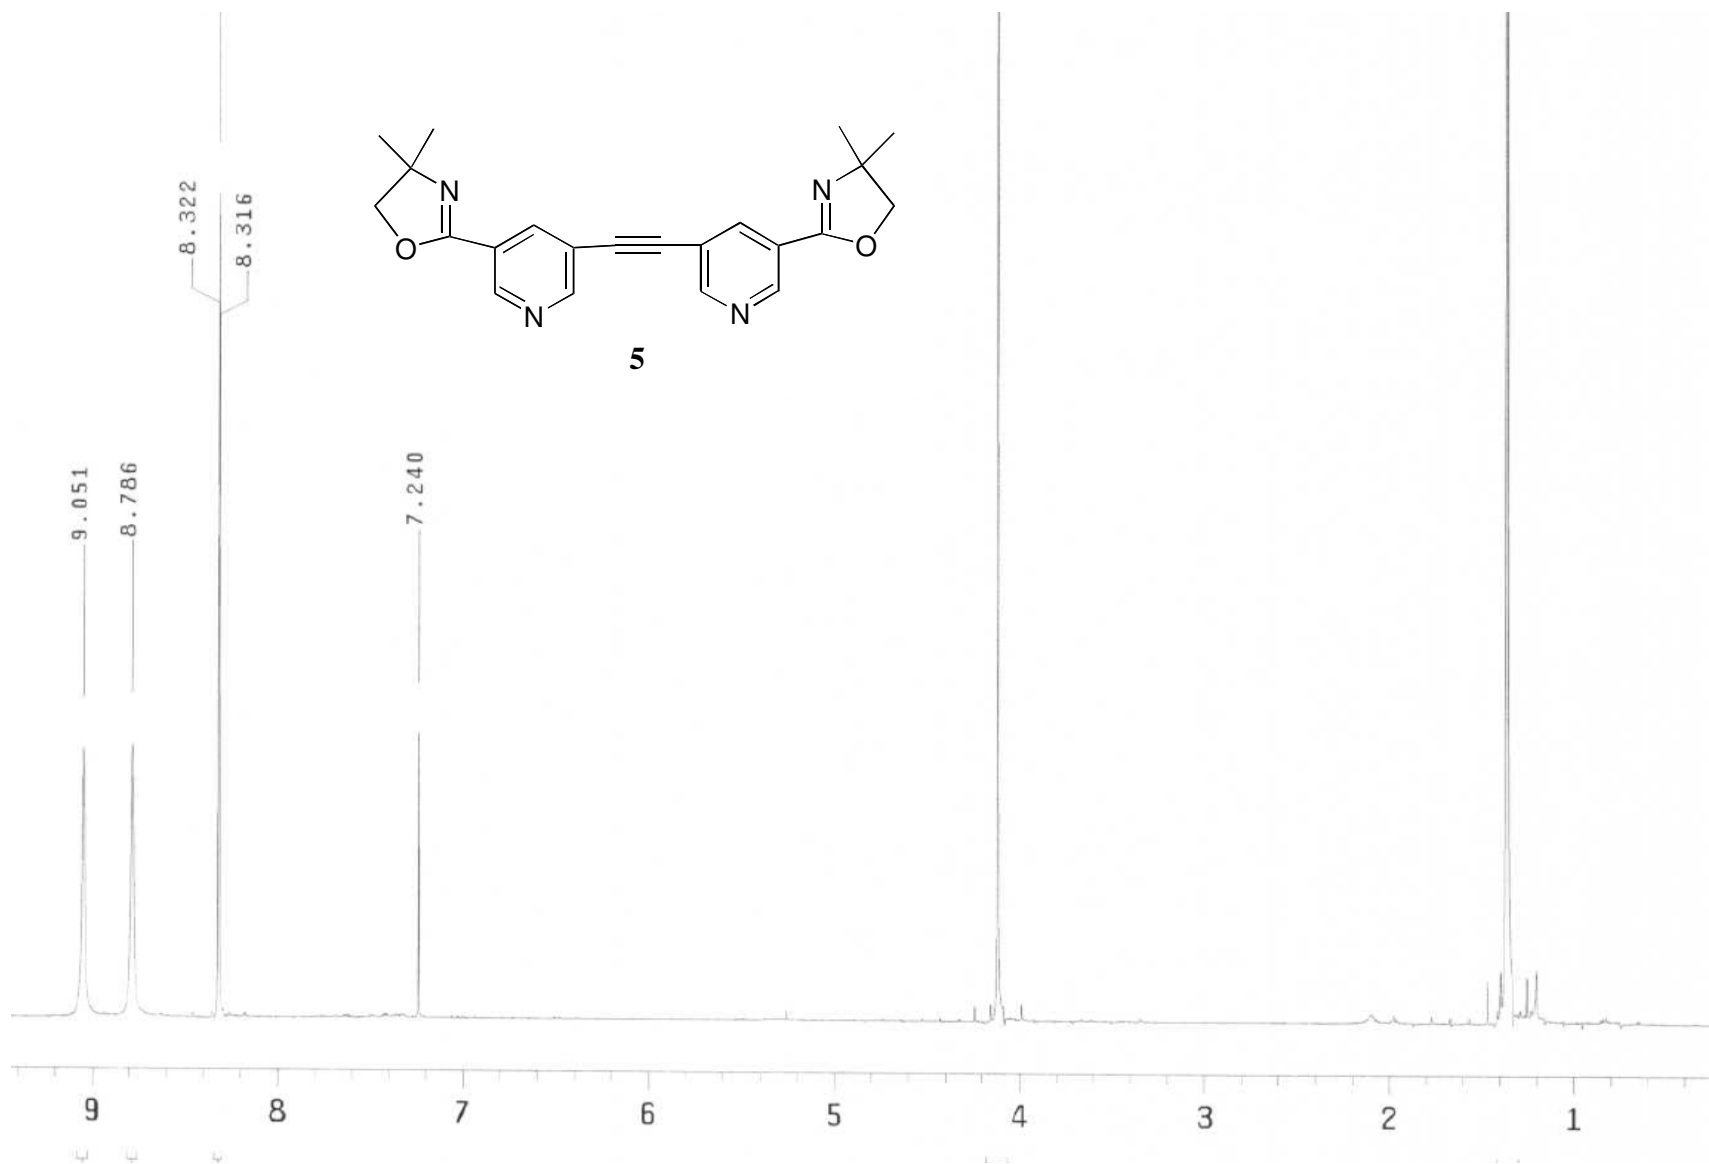

Figure S18 <sup>13</sup>C-NMR of **5**: 1,2-bis(5-(4,4-dimethyl-4,5-dihydrooxazol-2-yl)-pyridin-3-yl)ethyne

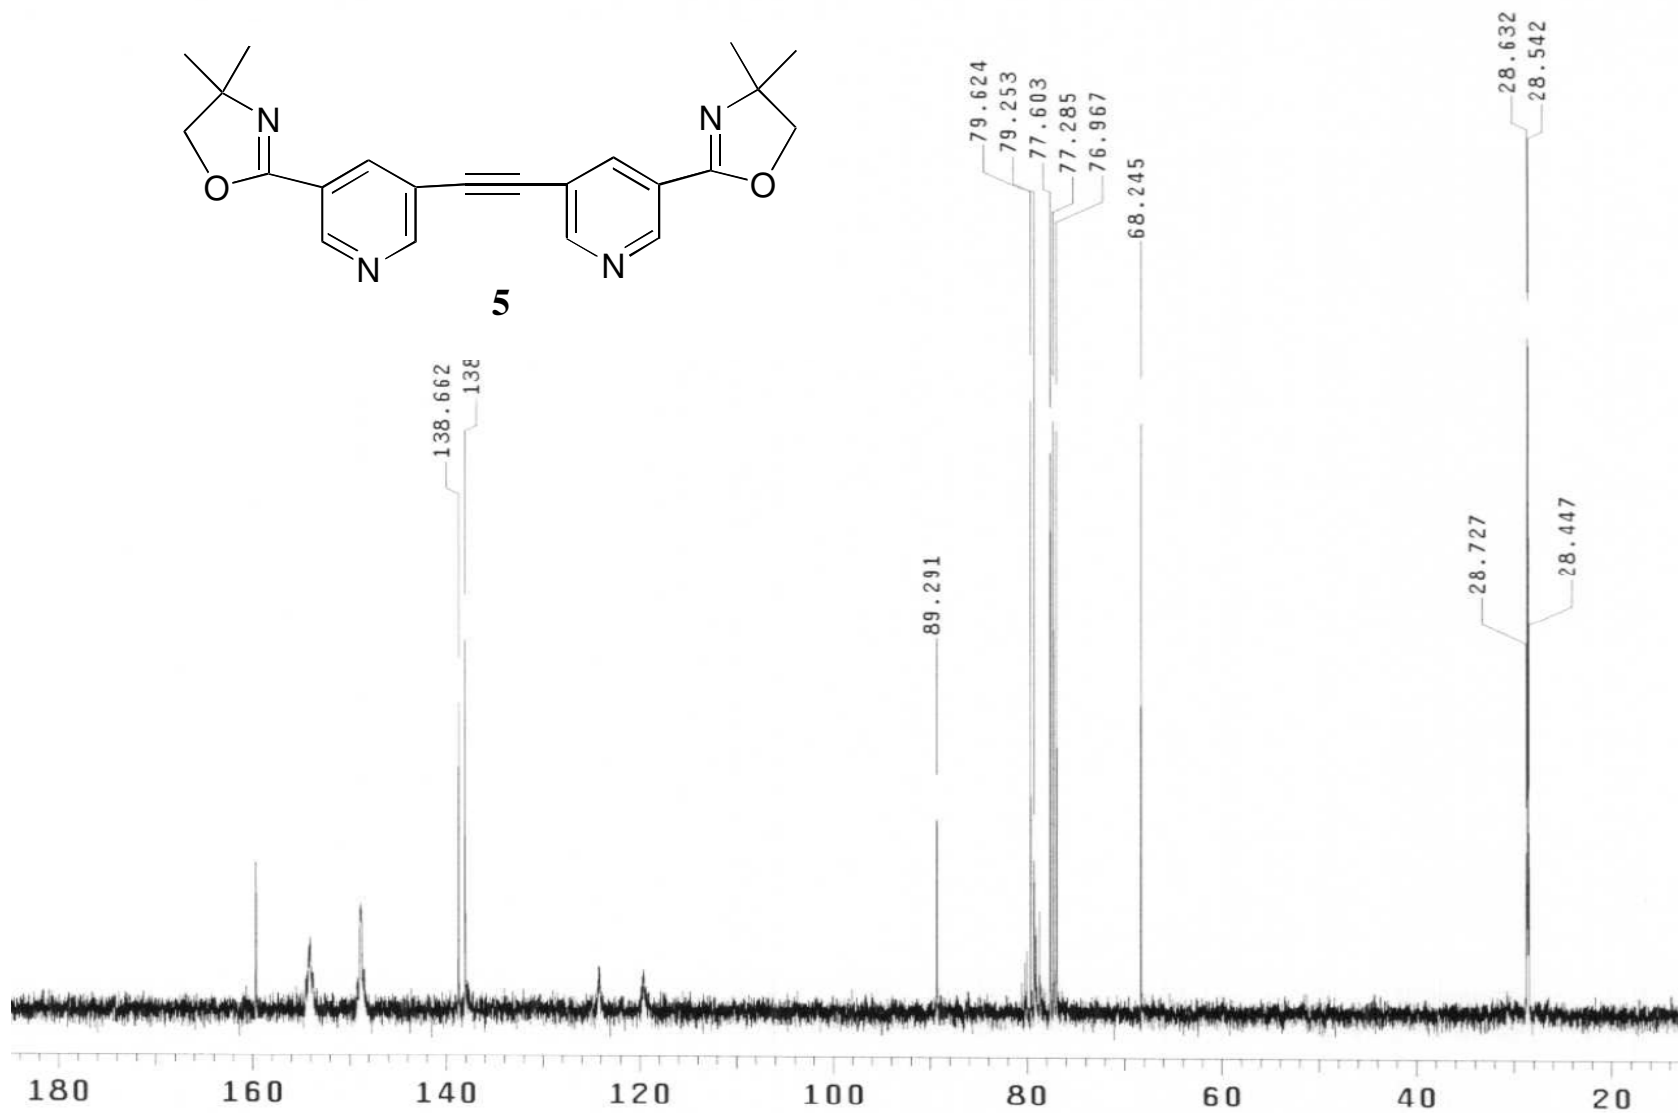

Figure S19 <sup>1</sup>H-NMR: 4-*n*-butyl-3-(4,5-dihydro-4,4-dimethyl-2-oxazolyl)-pyridine

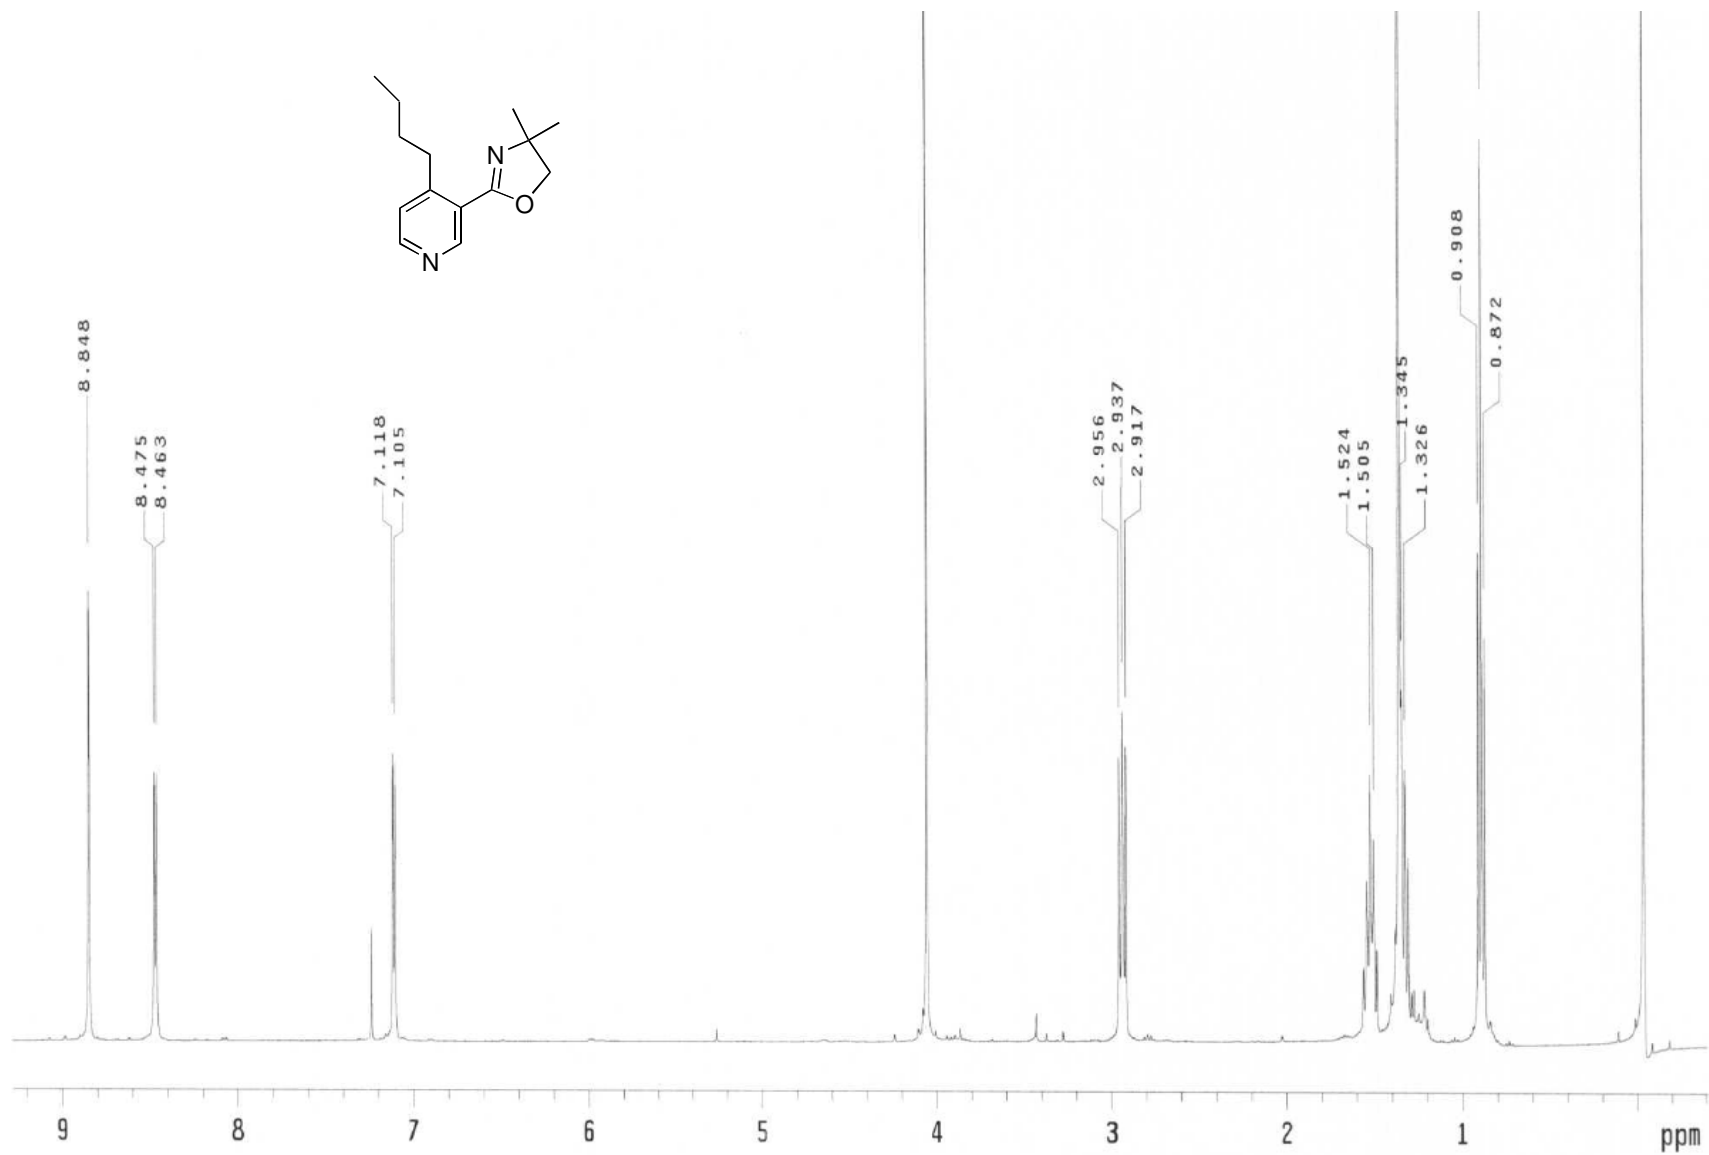

Figure S20 <sup>1</sup>H-NMR: 4-phenyl-3-(4,5-dihydro-4,4-dimethyl-2-oxazolyl)-pyridine

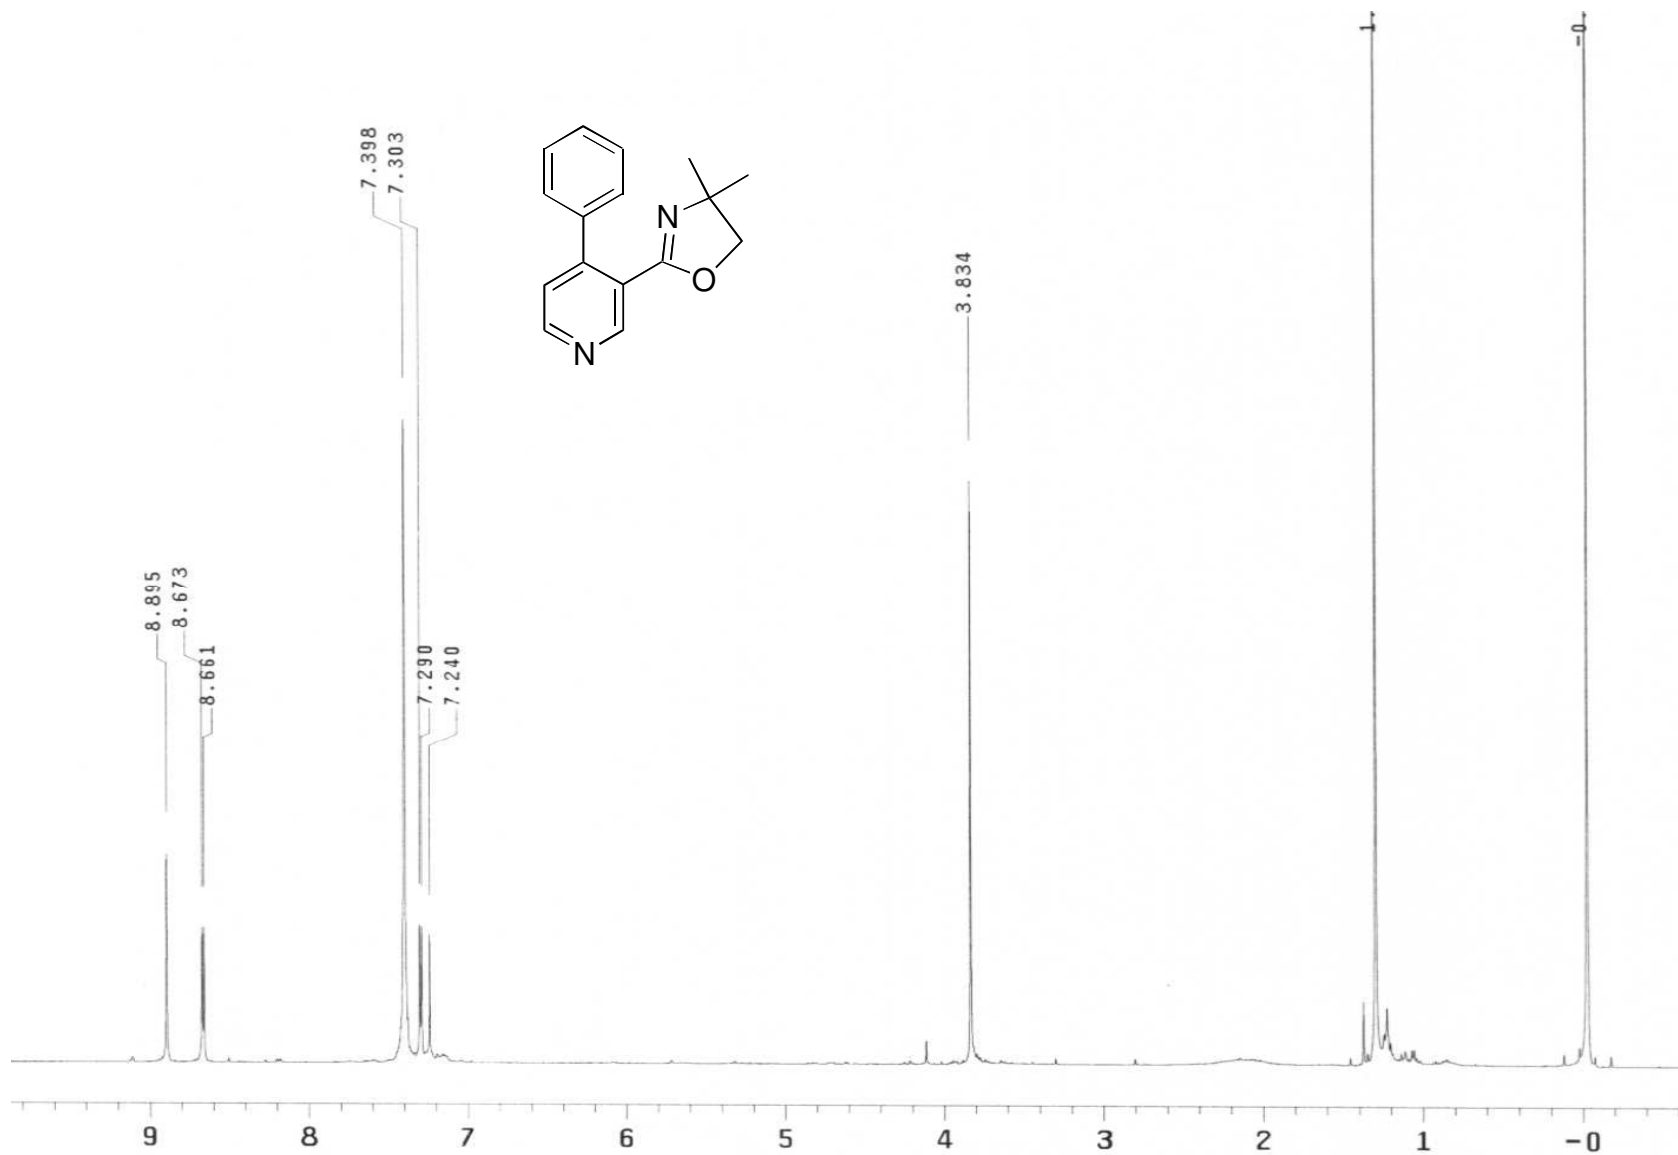



Figure S21 <sup>1</sup>H-NMR of **6**: 4,4-dimethyl-2-(5-((triethylsilyl)ethynyl)pyridine-3-yl)-4,5-dihydrooxazole

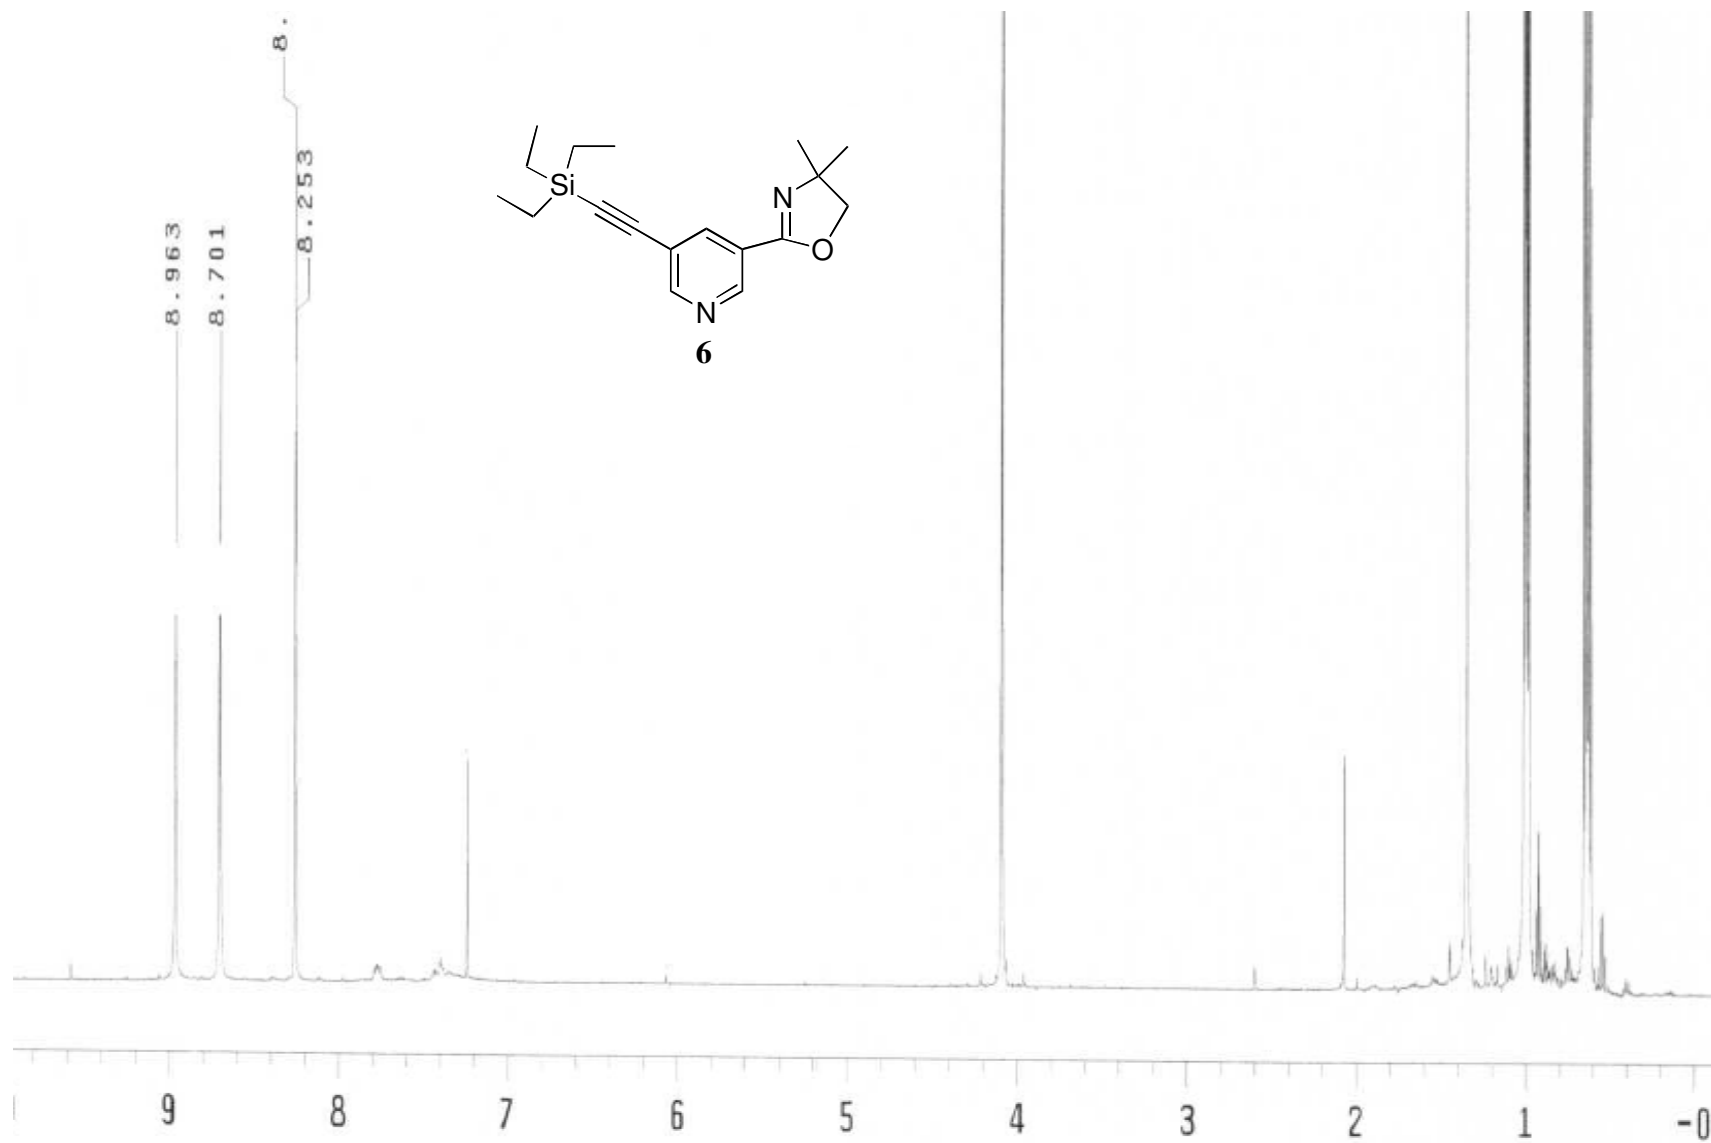

Figure S22  $^{13}\text{C}$ -NMR of **6**: 4,4-dimethyl-2-(5-((triethylsilyl)ethynyl)pyridine-3-yl)-4,5-dihydrooxazole

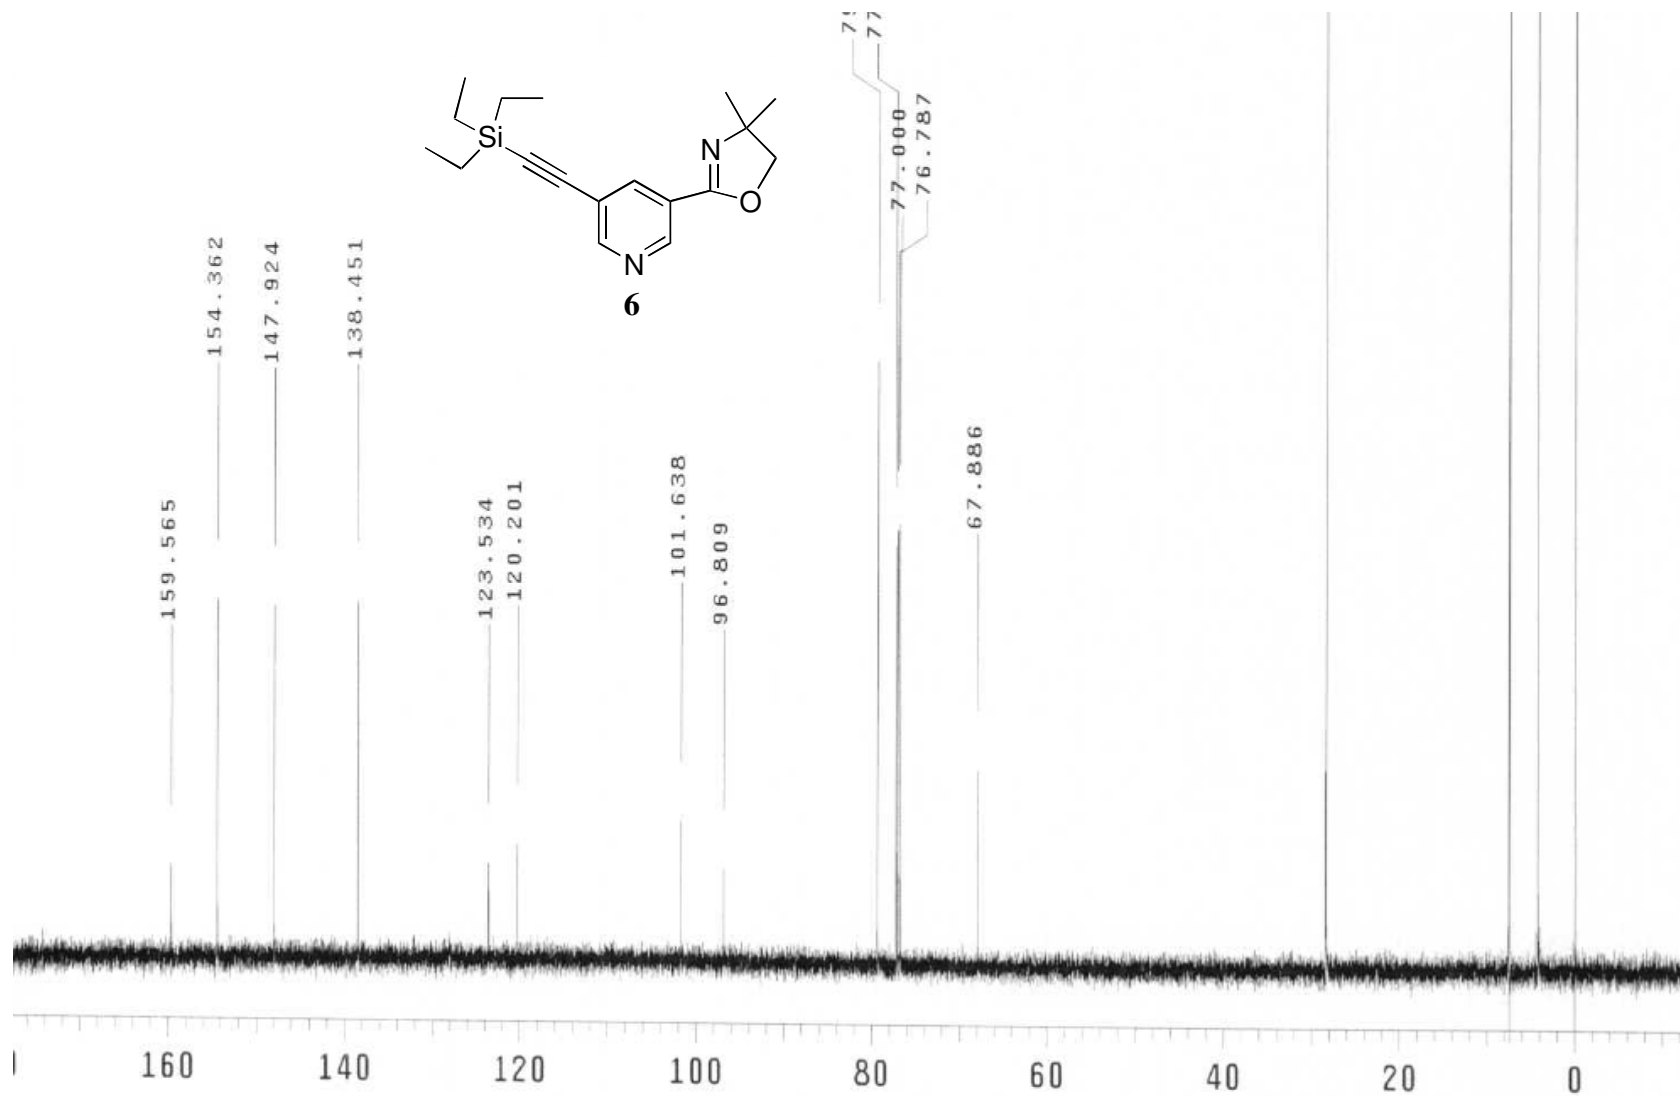

Figure S23  $^1\text{H-NMR}$ : 5-ethynyl-3-(4,5-dihydro-4,4-dimethyl-2-oxazolyl)-pyridine; precursor of 5-ethylnicotinic acid (**3e**).

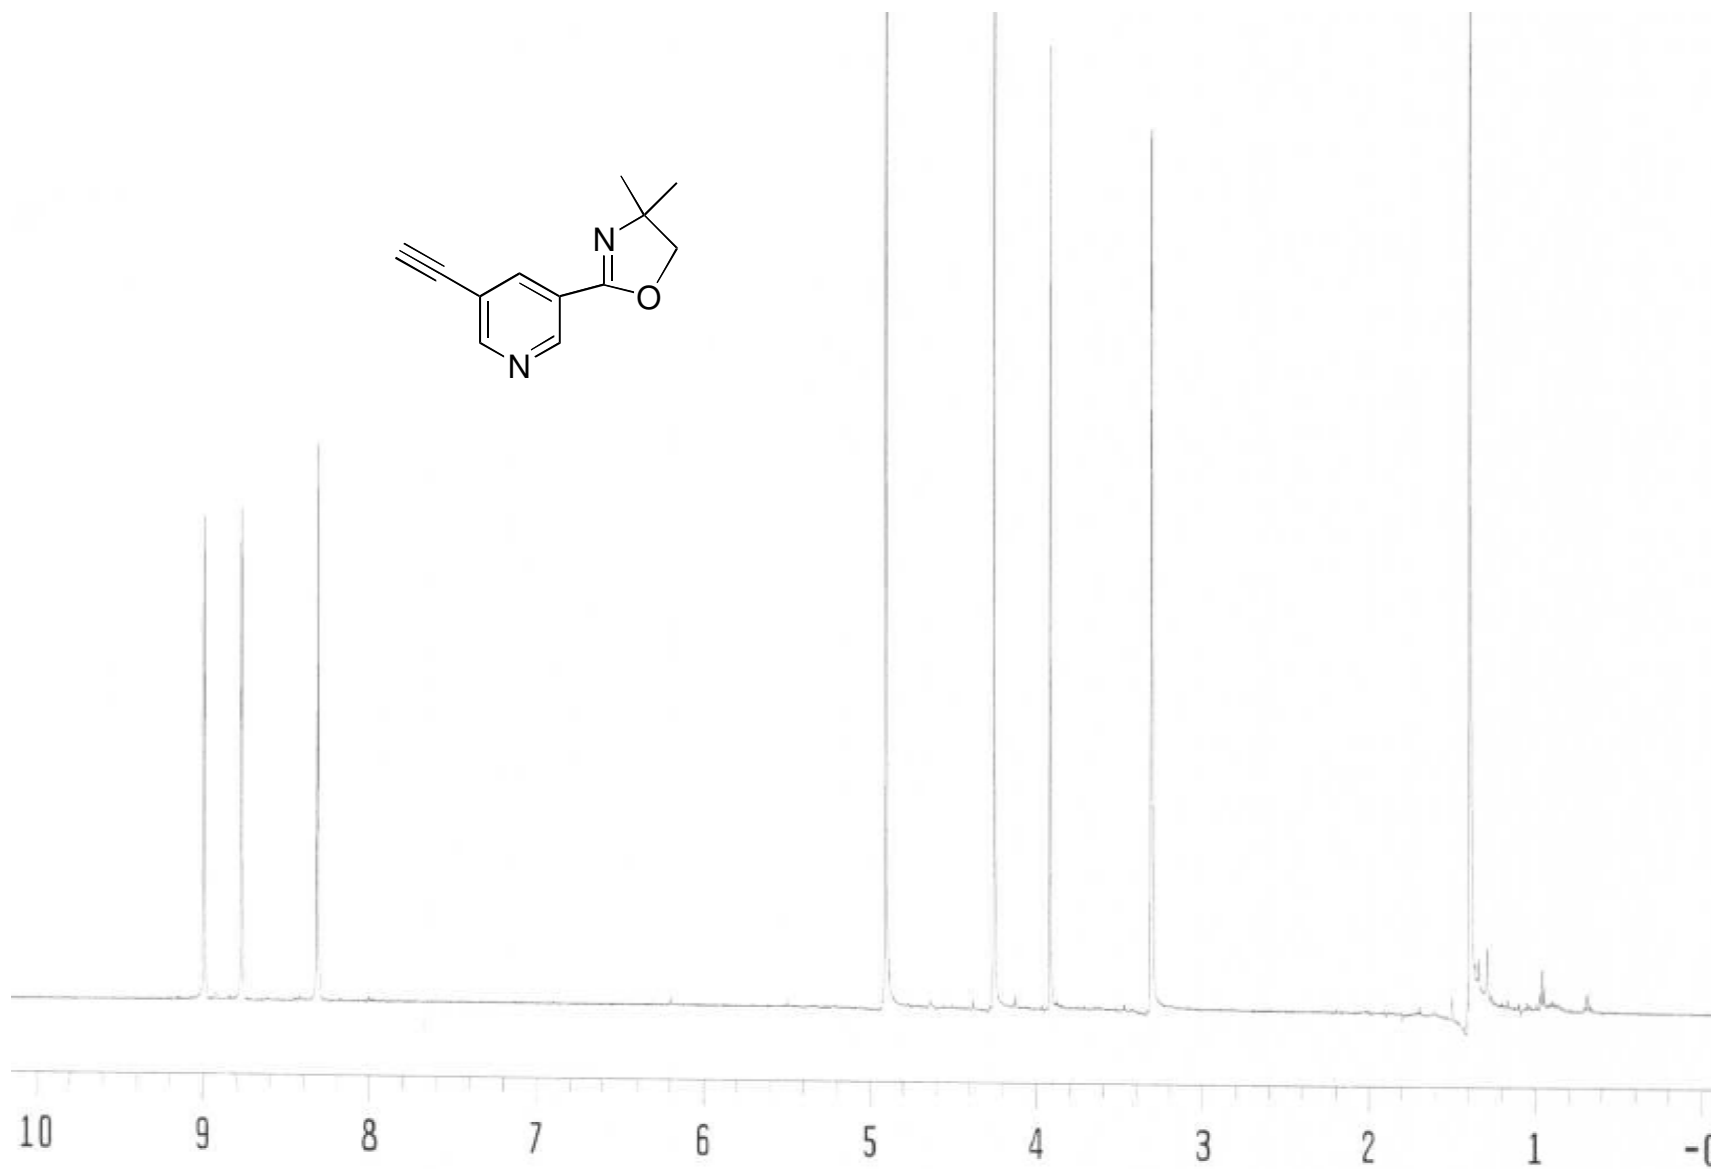

Figure S24  $^{13}\text{C}$ -NMR: 5-ethynyl-3-(4,5-dihydro-4,4-dimethyl-2-oxazolyl)-pyridine; precursor of 5-ethynlnicotinic acid (**3e**).

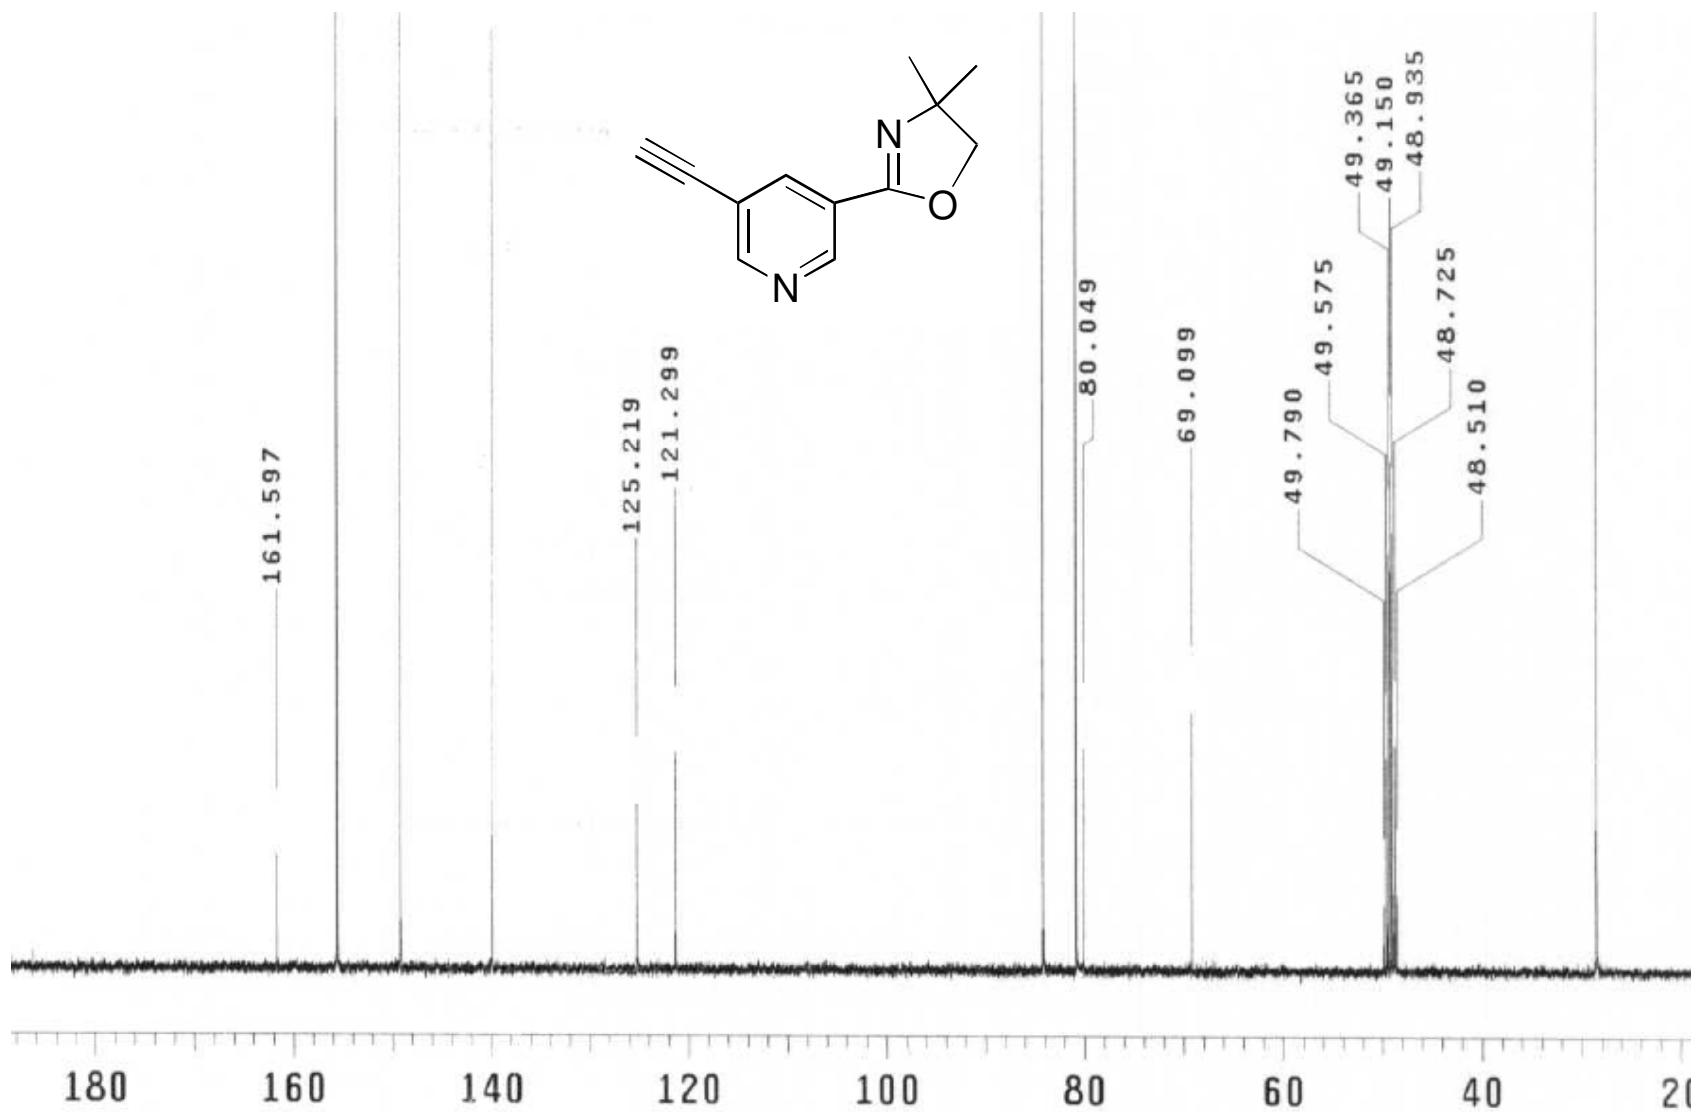

Figure S25 <sup>1</sup>H-NMR of **8**: pinacol ester of 5-(4,5-dihydro-4,4-dimethyl-2-oxazolyl)-3-pyridinyl boronic acid (pinacol ester **8**)

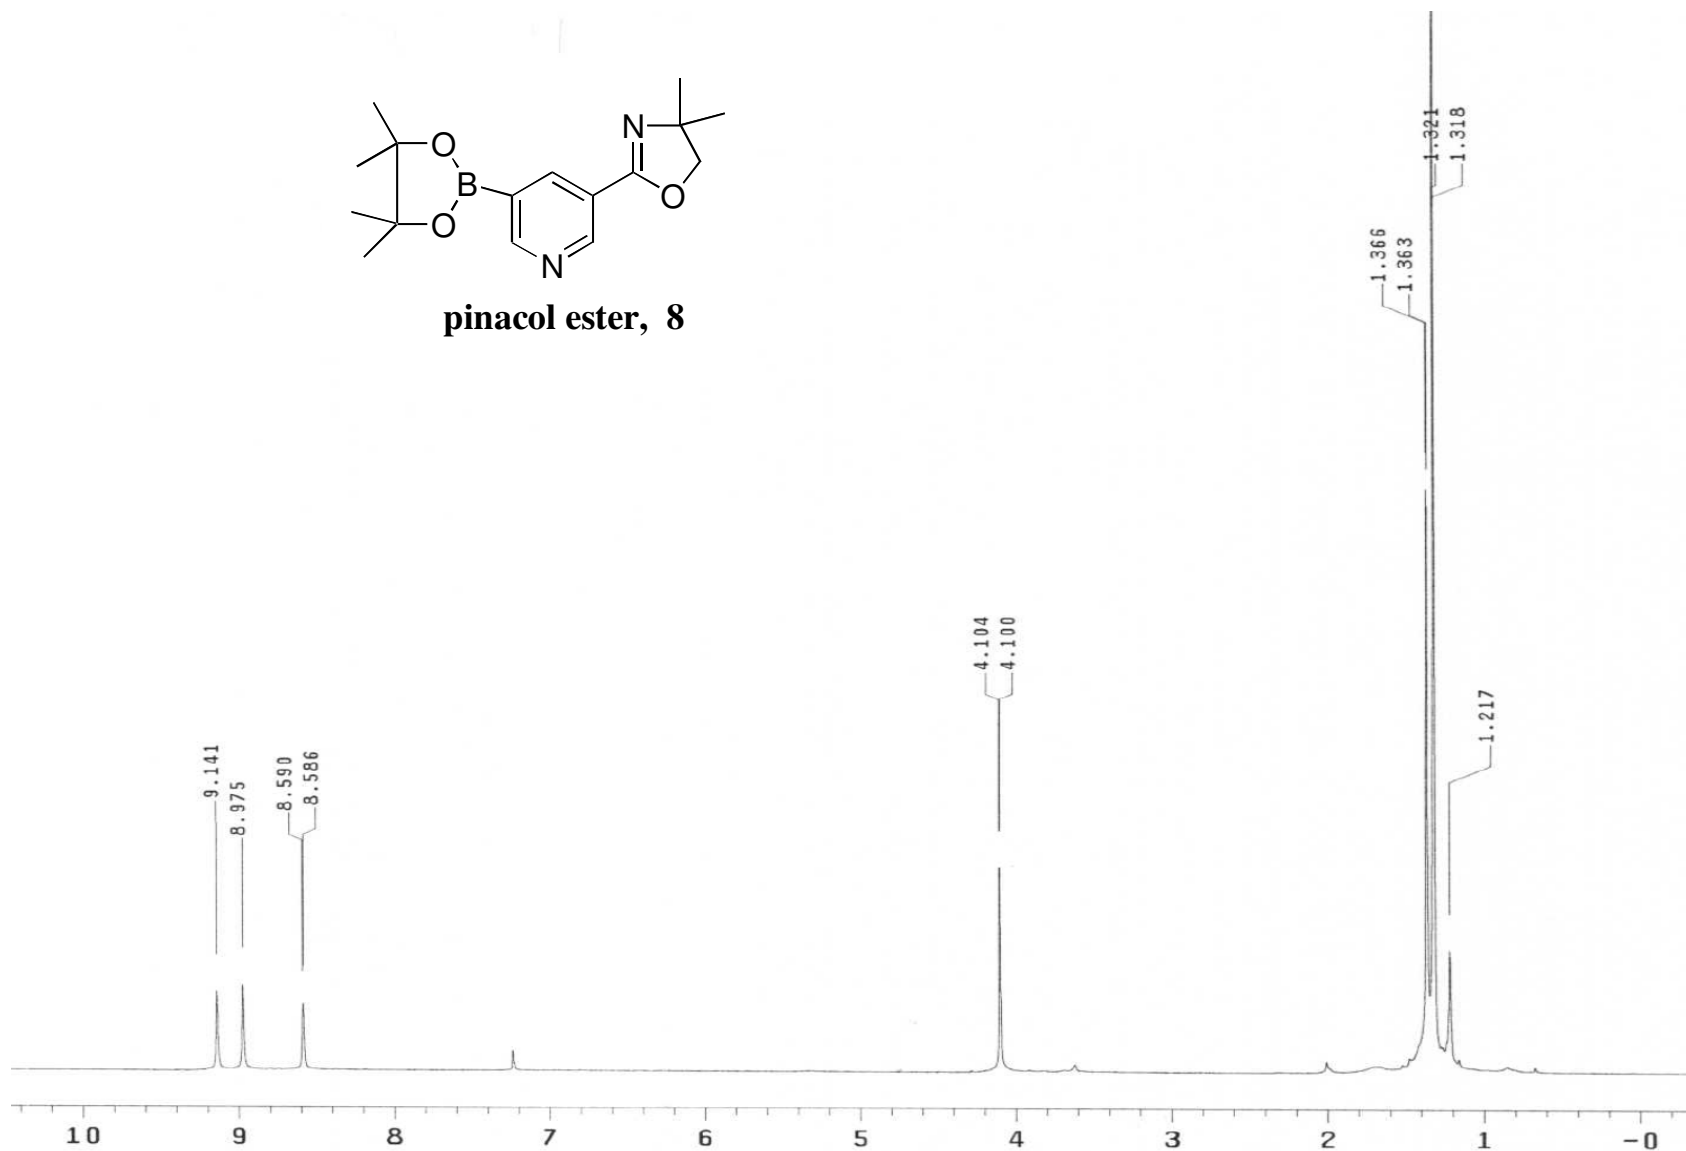

Figure S26  $^1\text{H-NMR}$  of **9**: 5-phenyl-3-(4,5-dihydro-4,4-dimethyl-2-oxazolyl)-pyridine

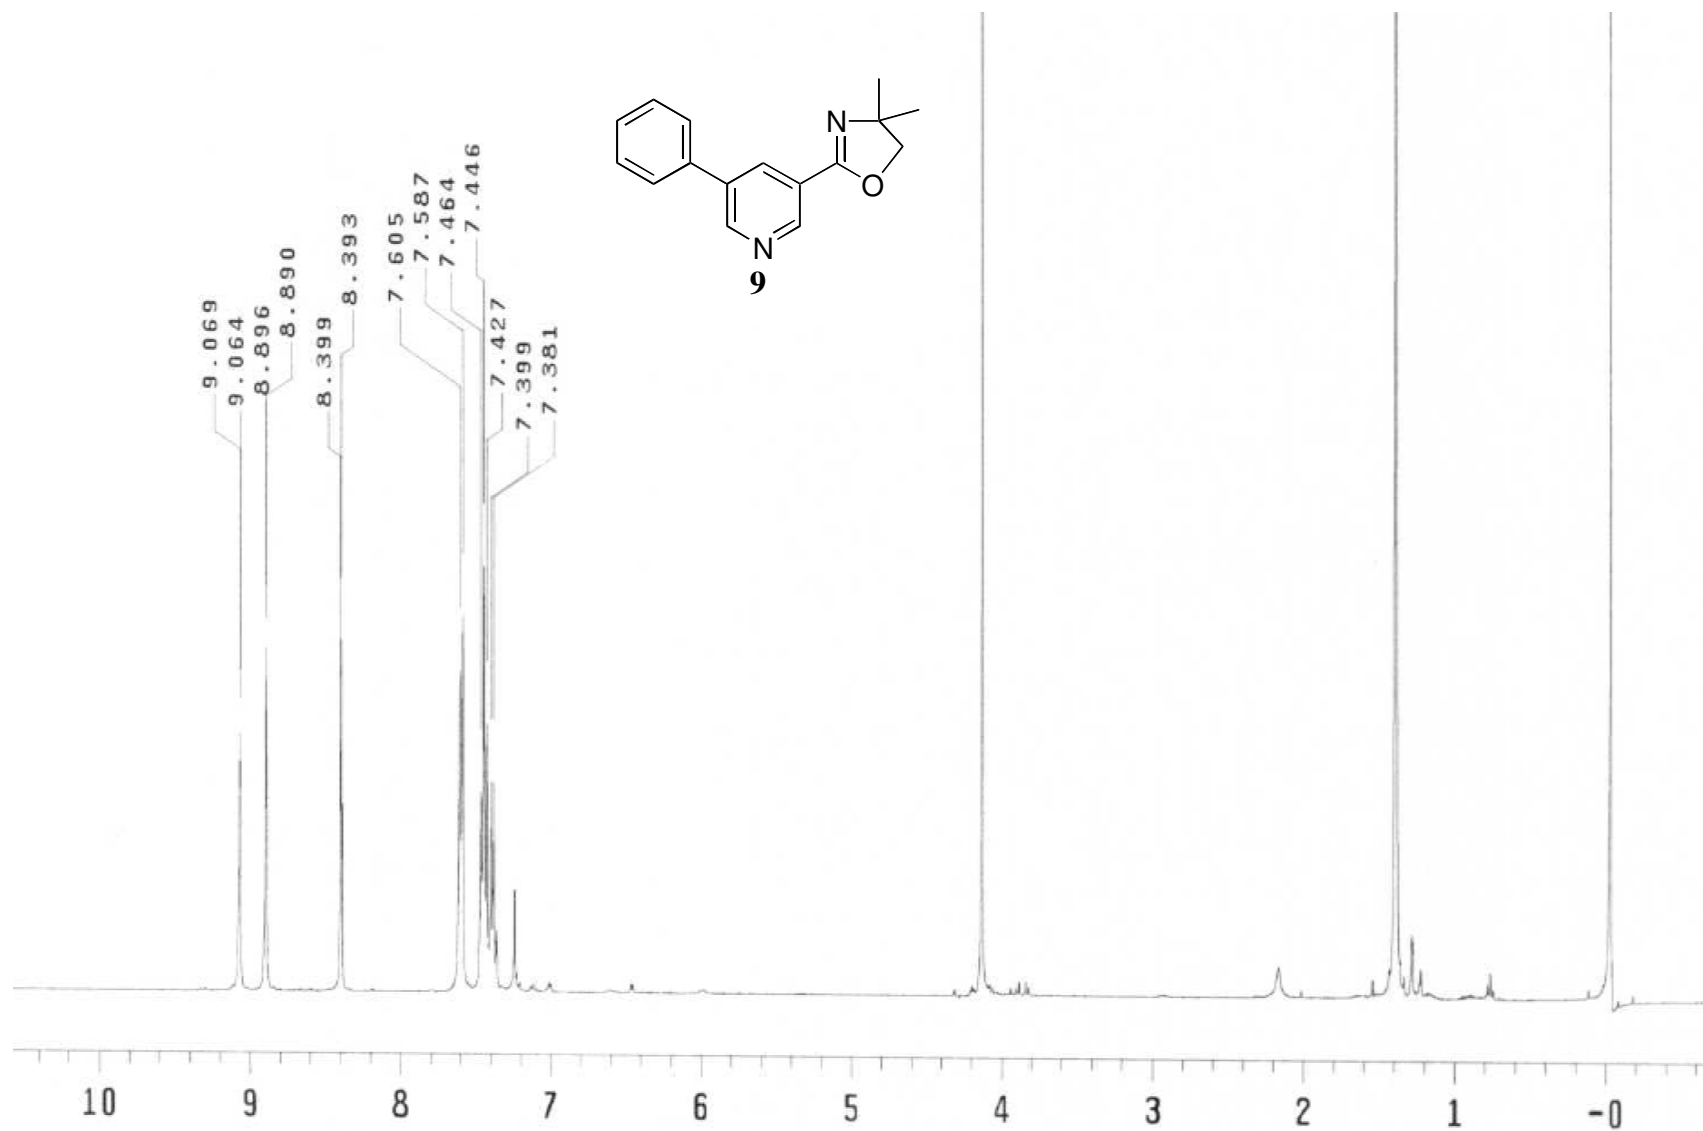

Figure S27  $^{13}\text{C}$ -NMR of **9**: 5-phenyl-3-(4,5-dihydro-4,4-dimethyl-2-oxazolyl)-pyridine

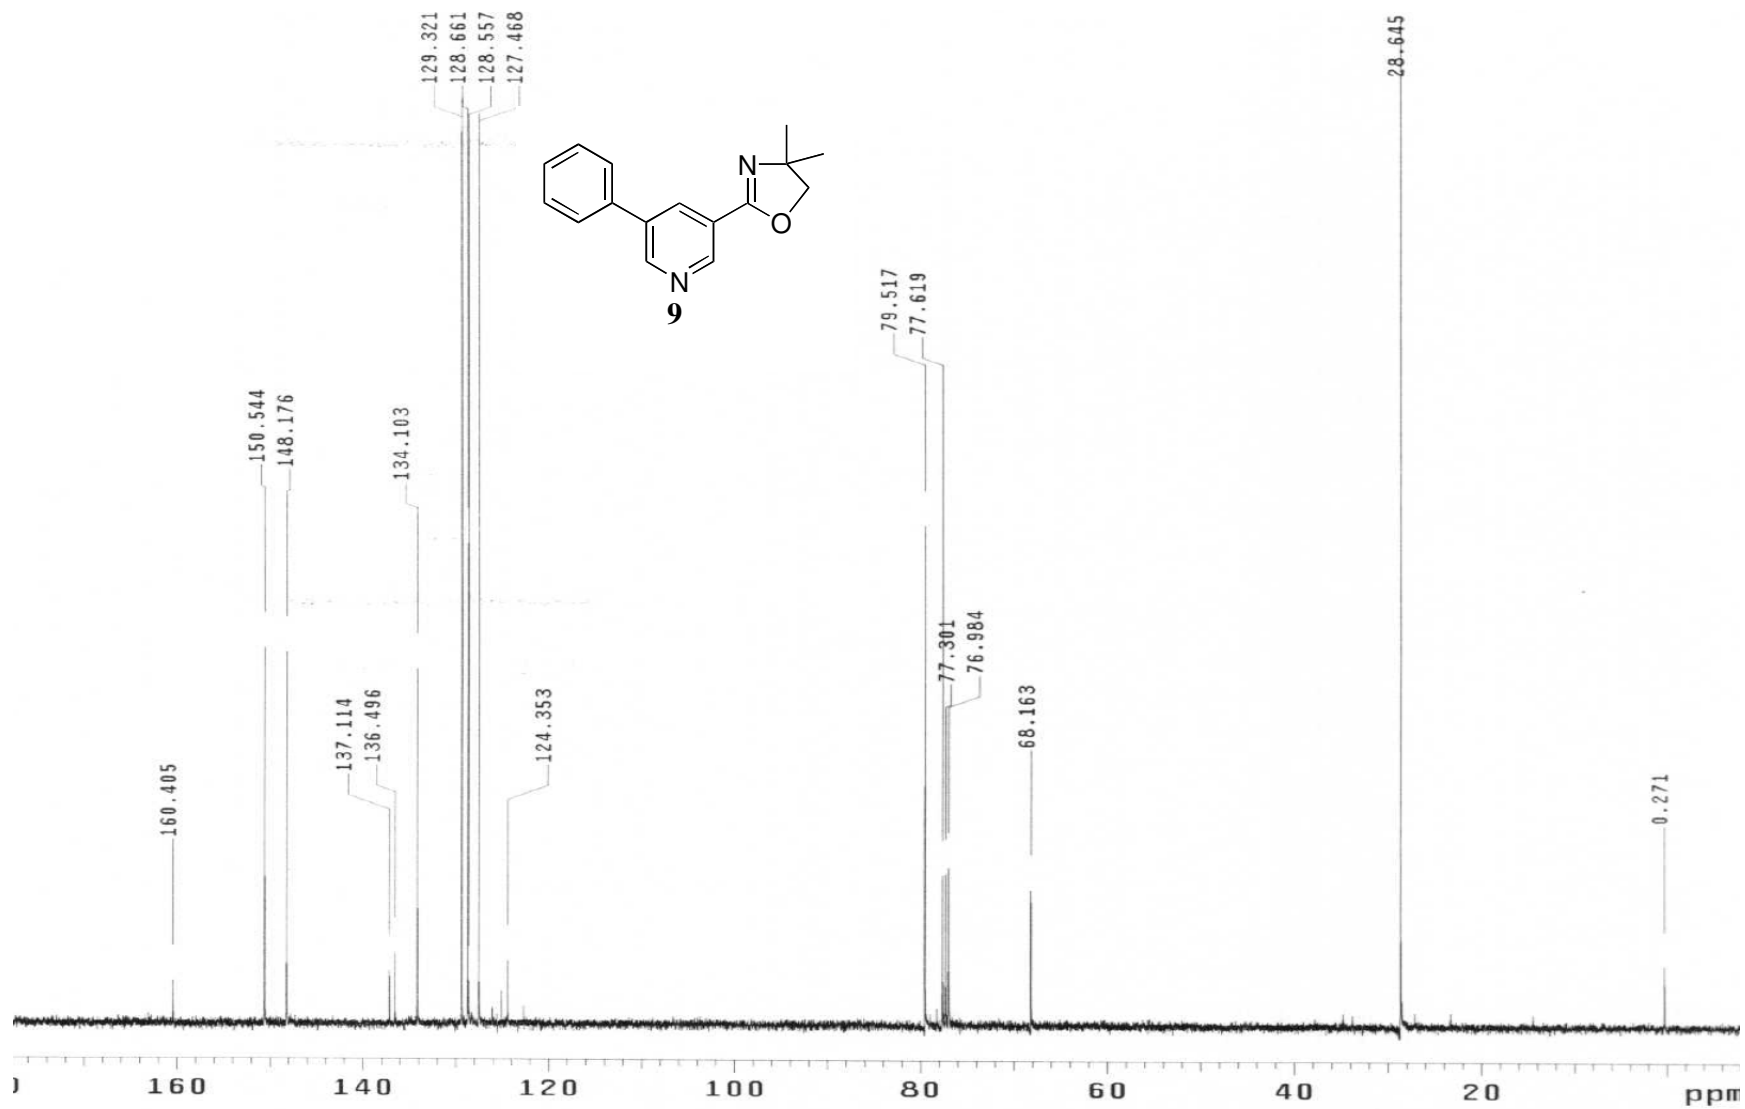

Figure S28  $^1\text{H-NMR}$  of **10**: 5-aminonicotinic acid ethyl ester

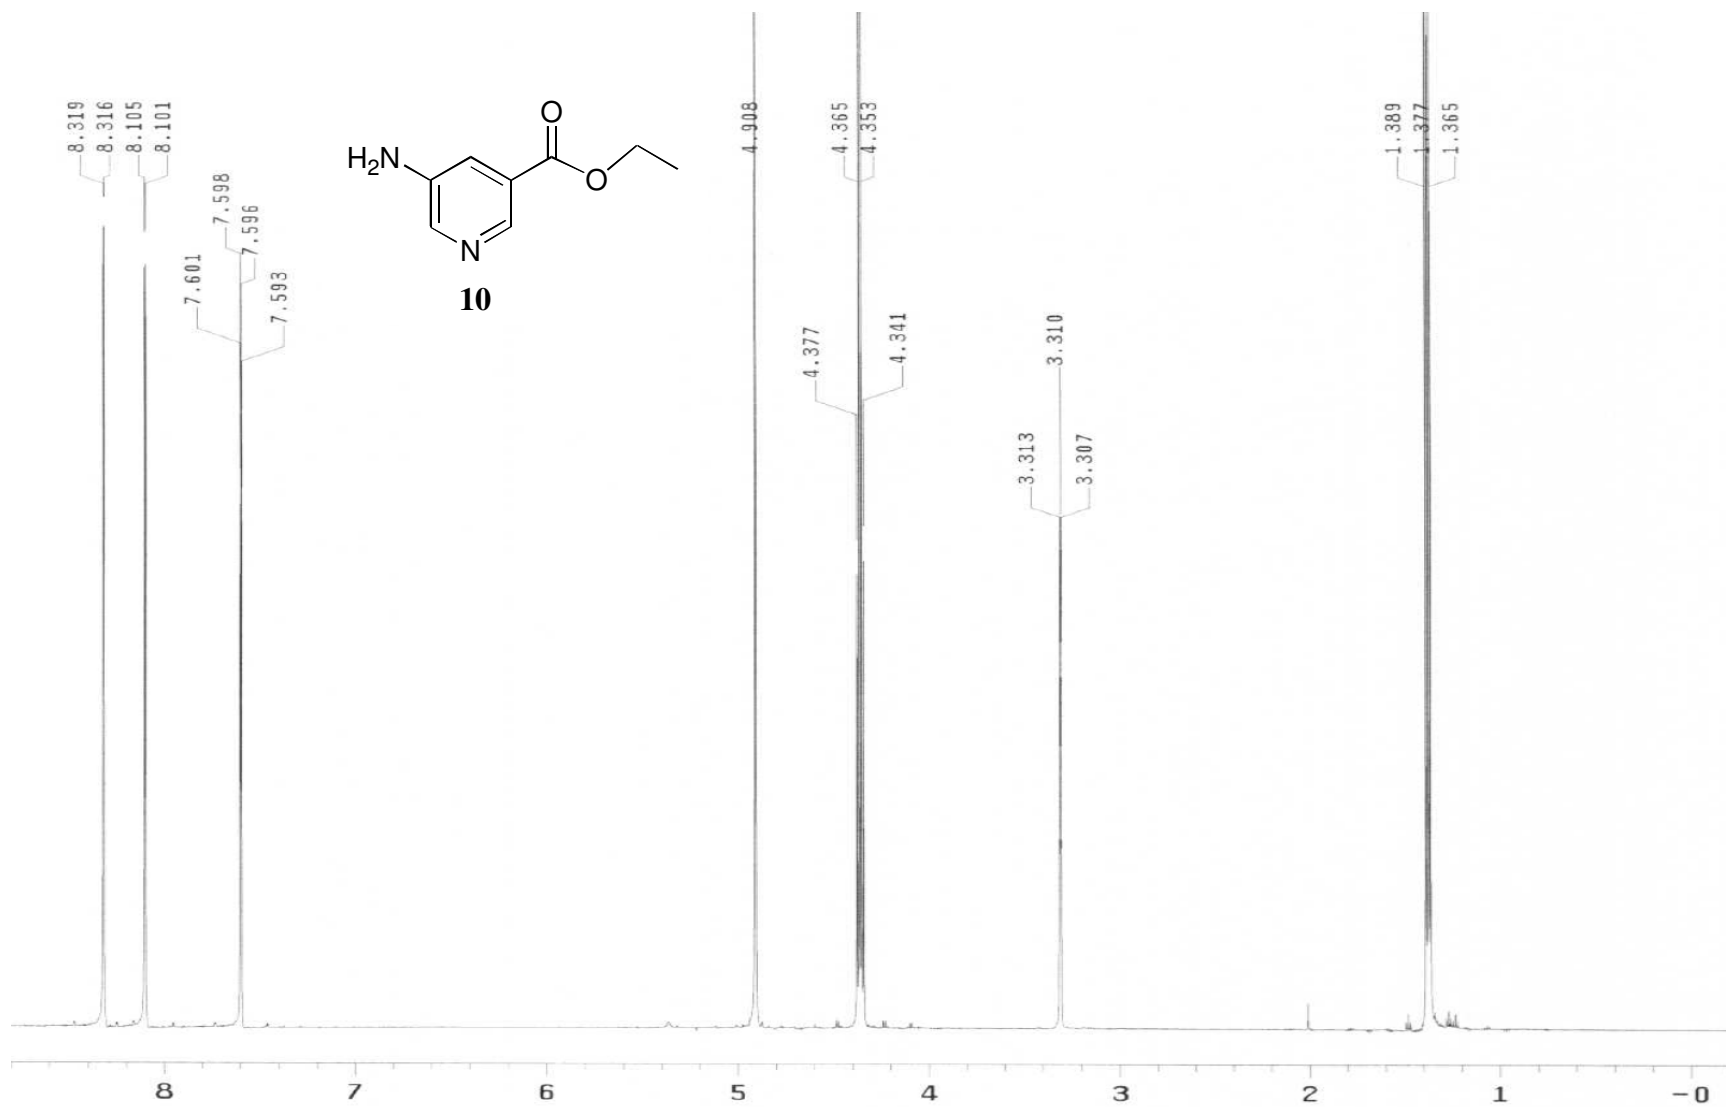



Figure S29  $^{13}\text{C}$ -NMR of **10**: 5-aminonicotinic acid ethyl ester

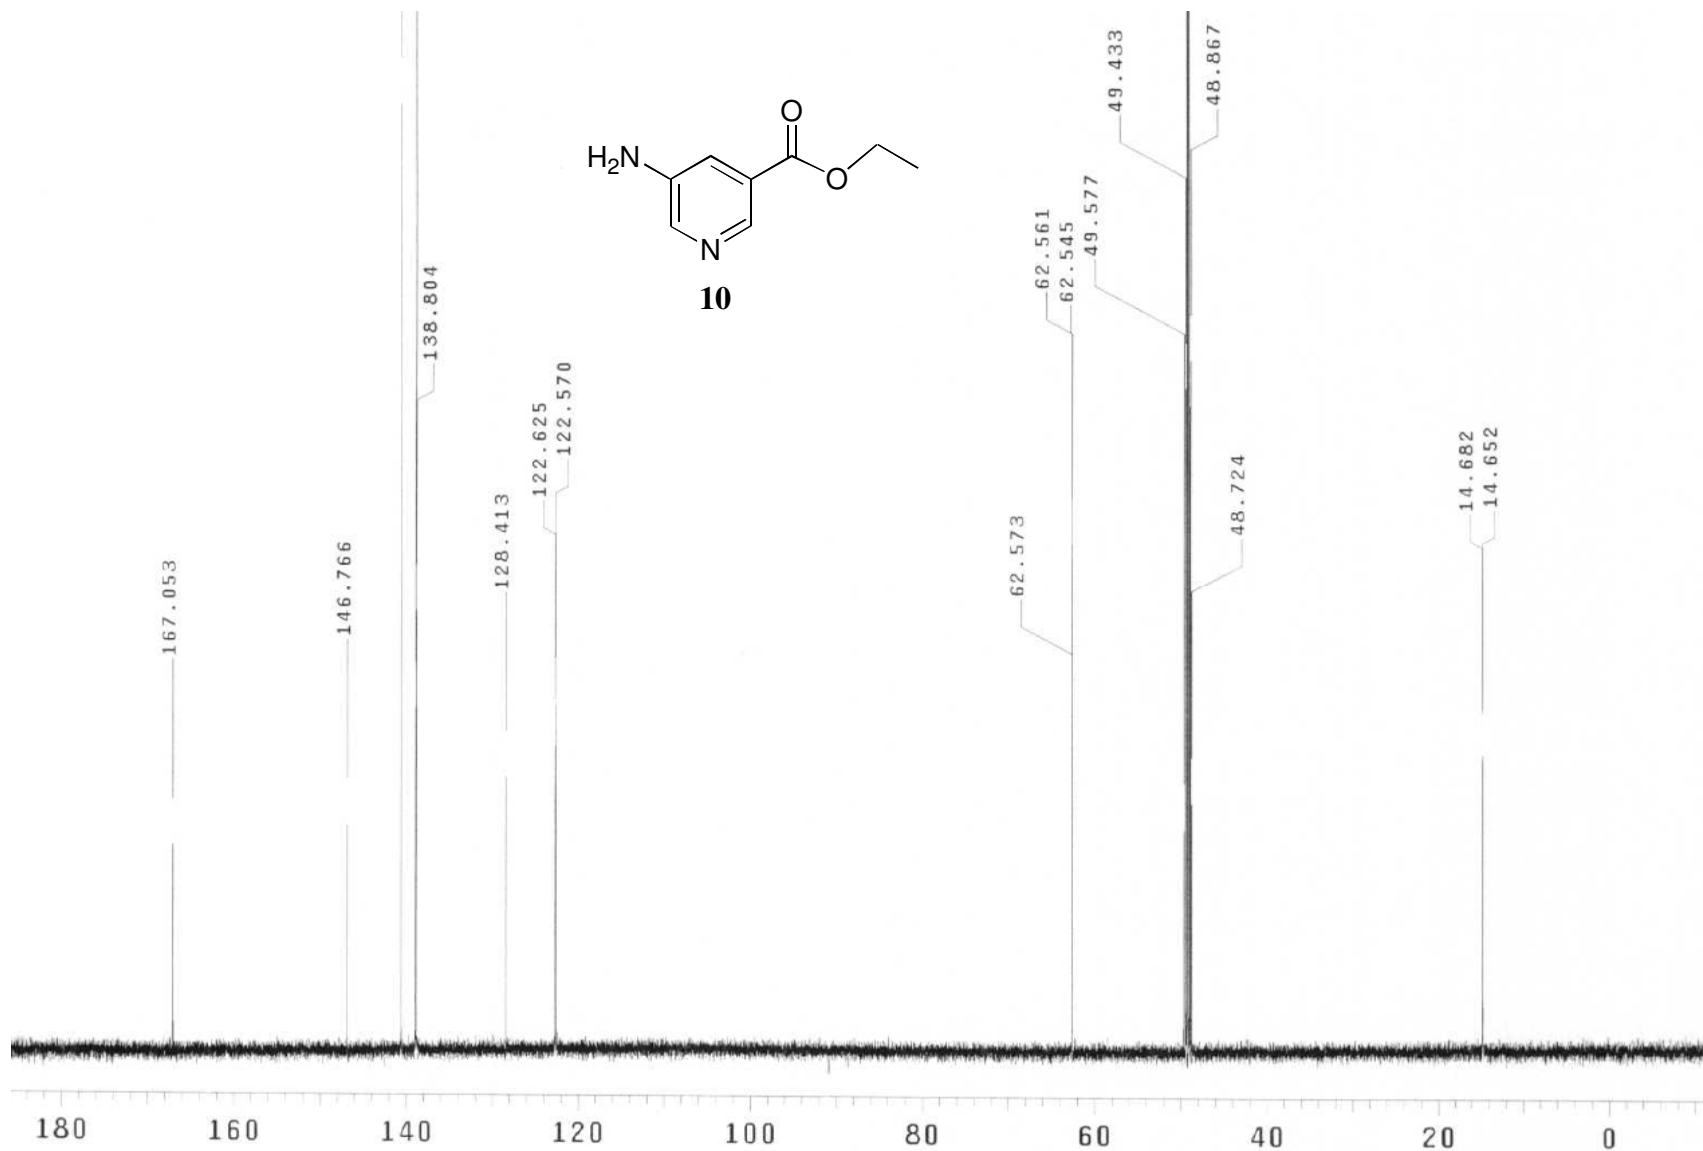

Figure S30 <sup>1</sup>H-NMR of **11**: 5-azidonicotinic acid ethyl ester

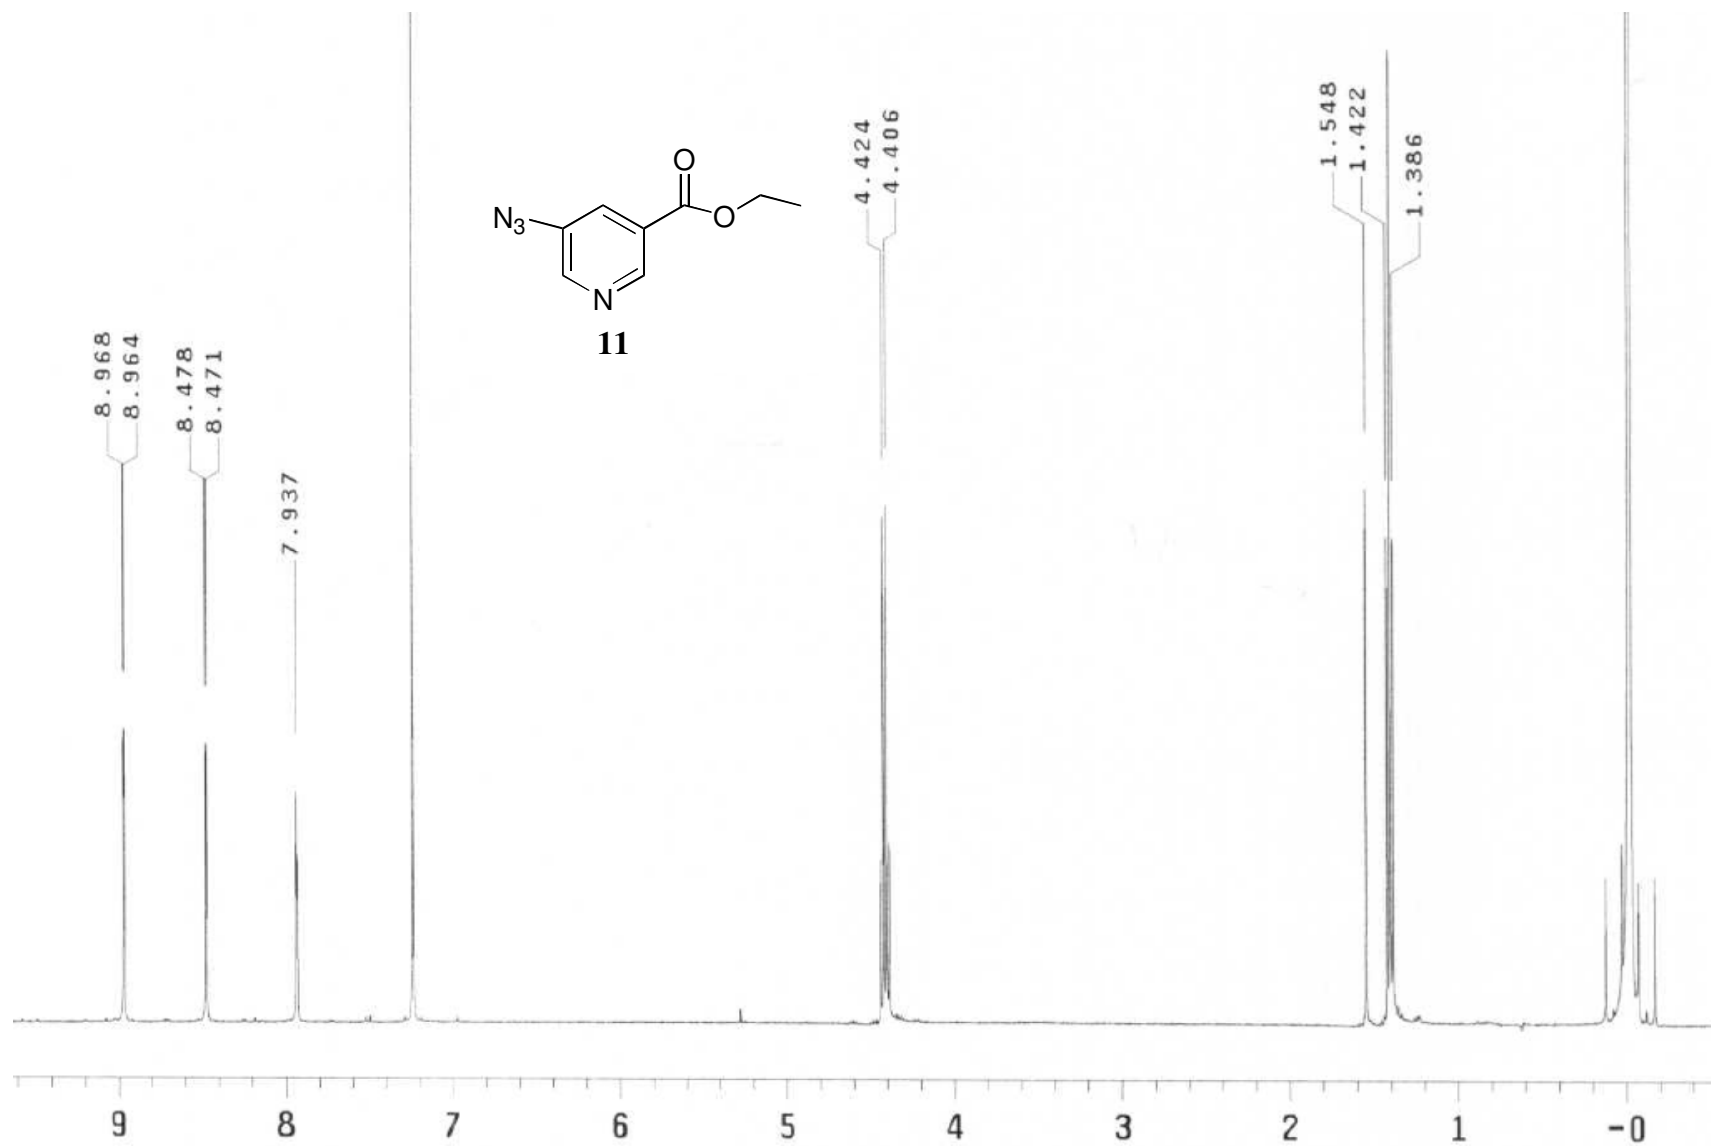

Figure S31  $^{13}\text{C}$ -NMR of **11**: 5-azidonicotinic acid ethyl ester

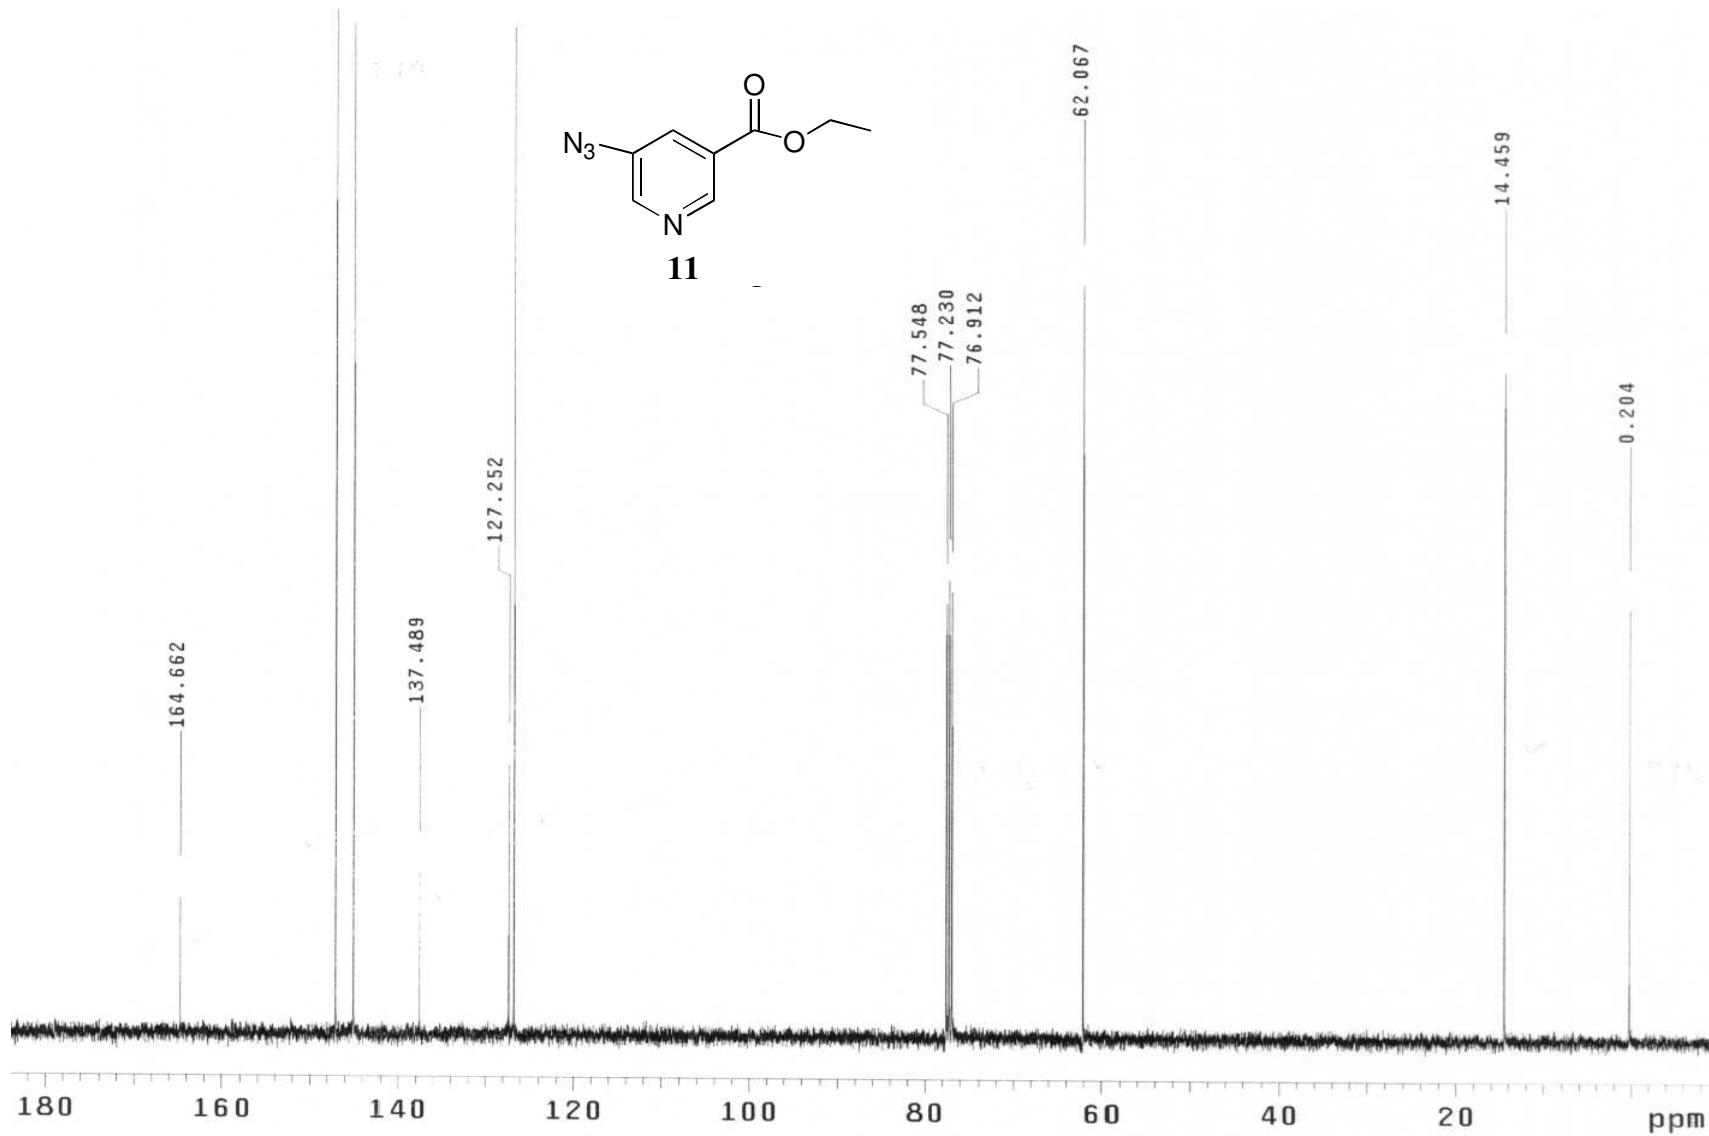

Figure S32 <sup>1</sup>H-NMR of **14**: ethyl 5-(4-(aminomethyl)-1*H*-1,2,3-triazol-1-yl)nicotinate

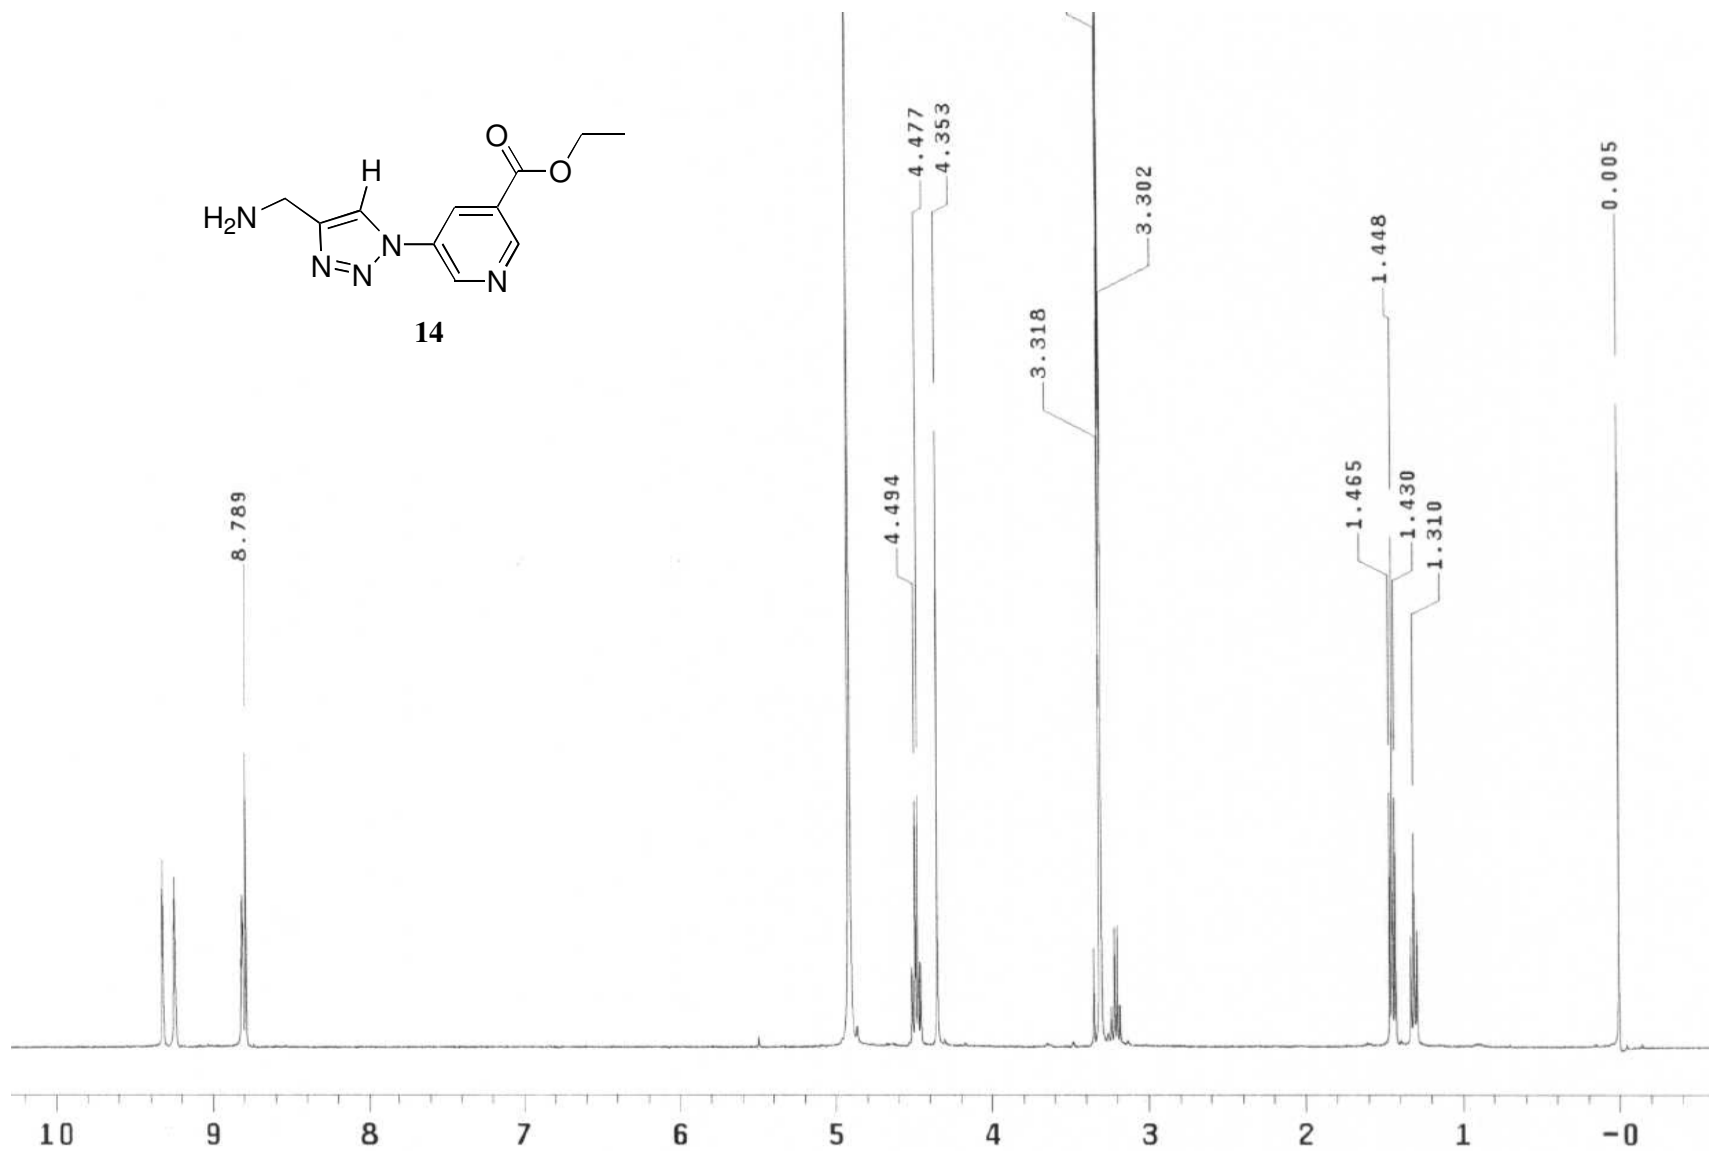

Figure S33  $^{13}\text{C}$ -NMR of **14**: ethyl 5-(4-(aminomethyl)-1*H*-1,2,3-triazol-1-yl)nicotinate

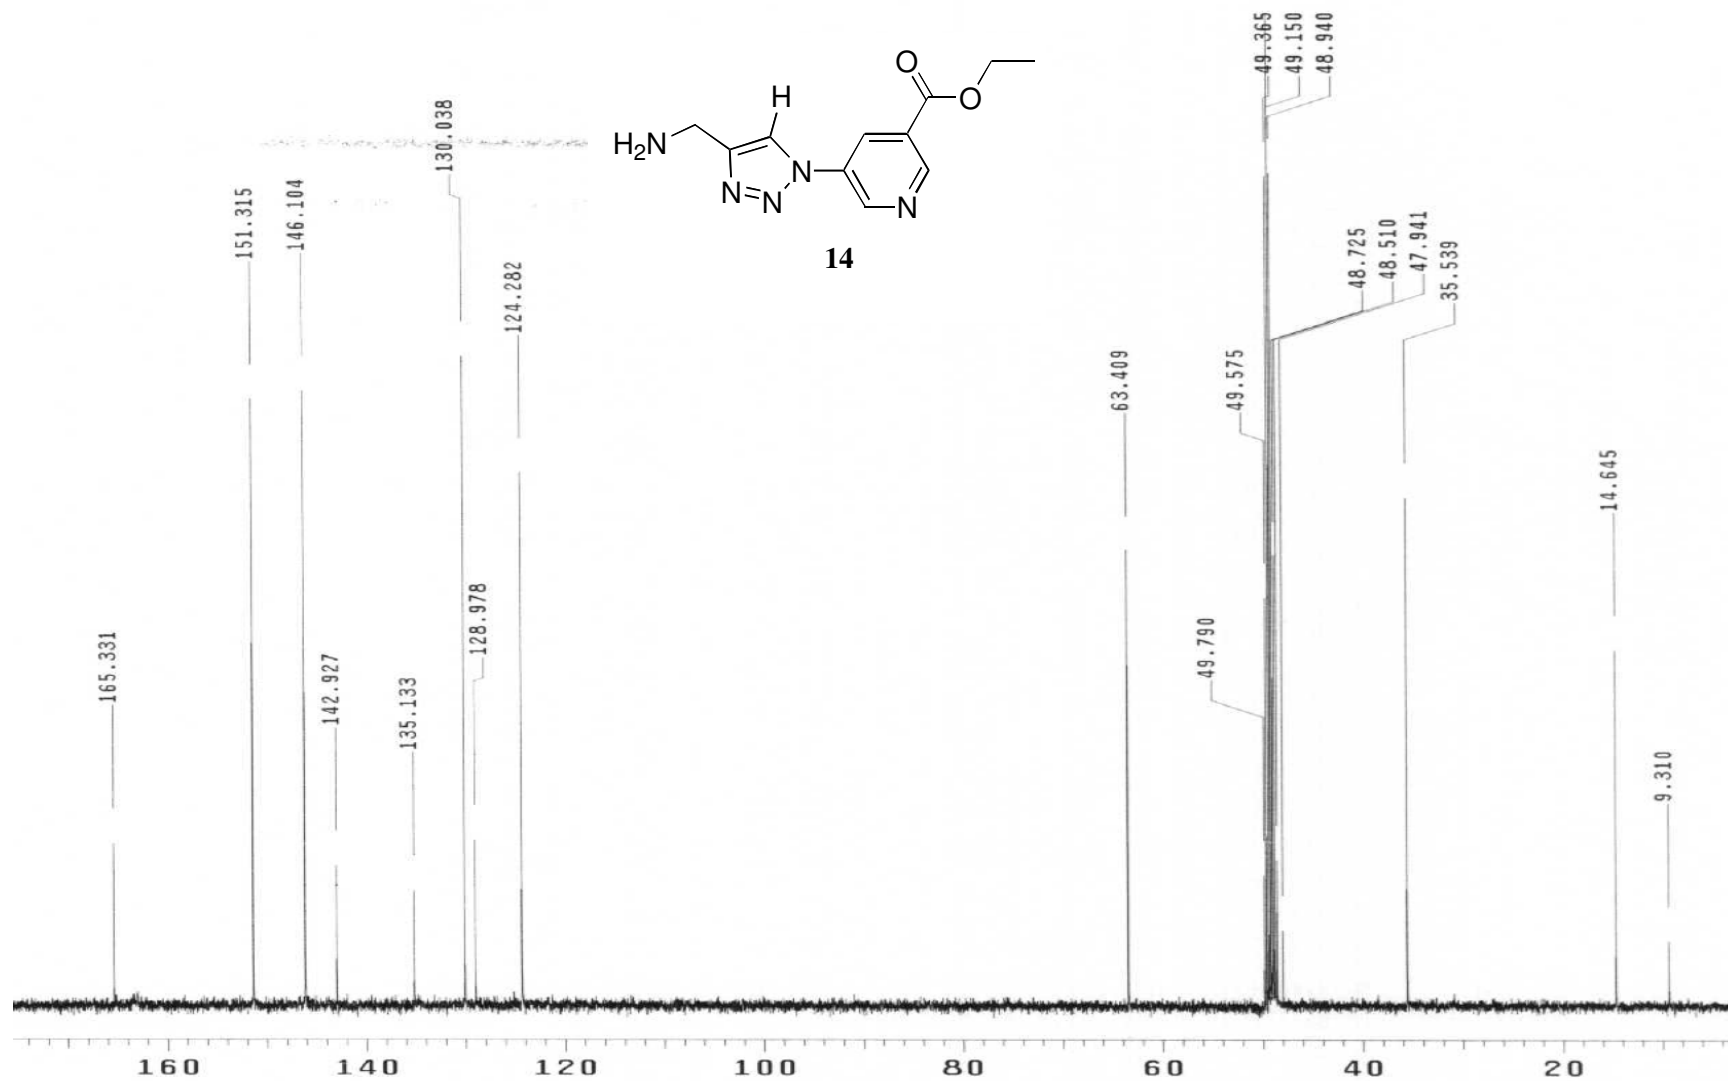

Figure S34 <sup>1</sup>H-NMR: 4-aminonicotinic acid methyl ester

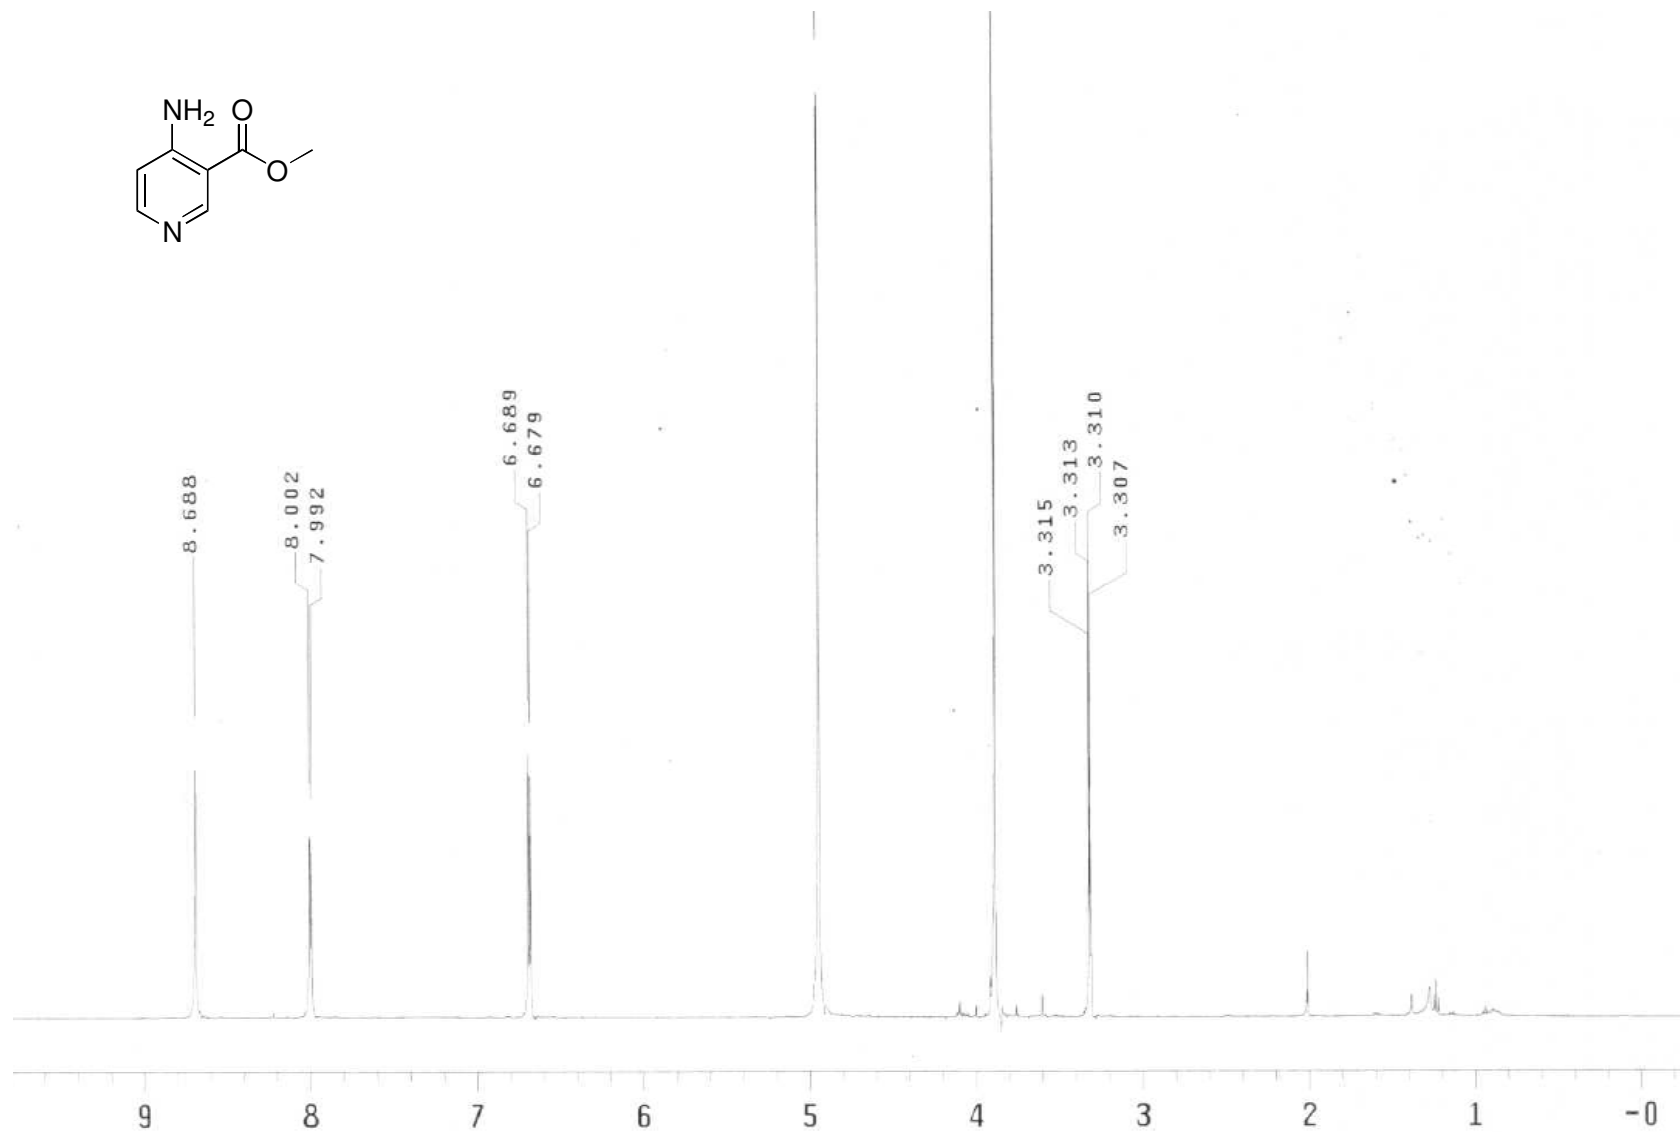

Figure S35  $^{13}\text{C}$ -NMR: 4-aminonicotinic acid methyl ester

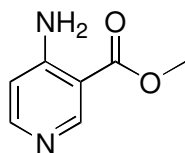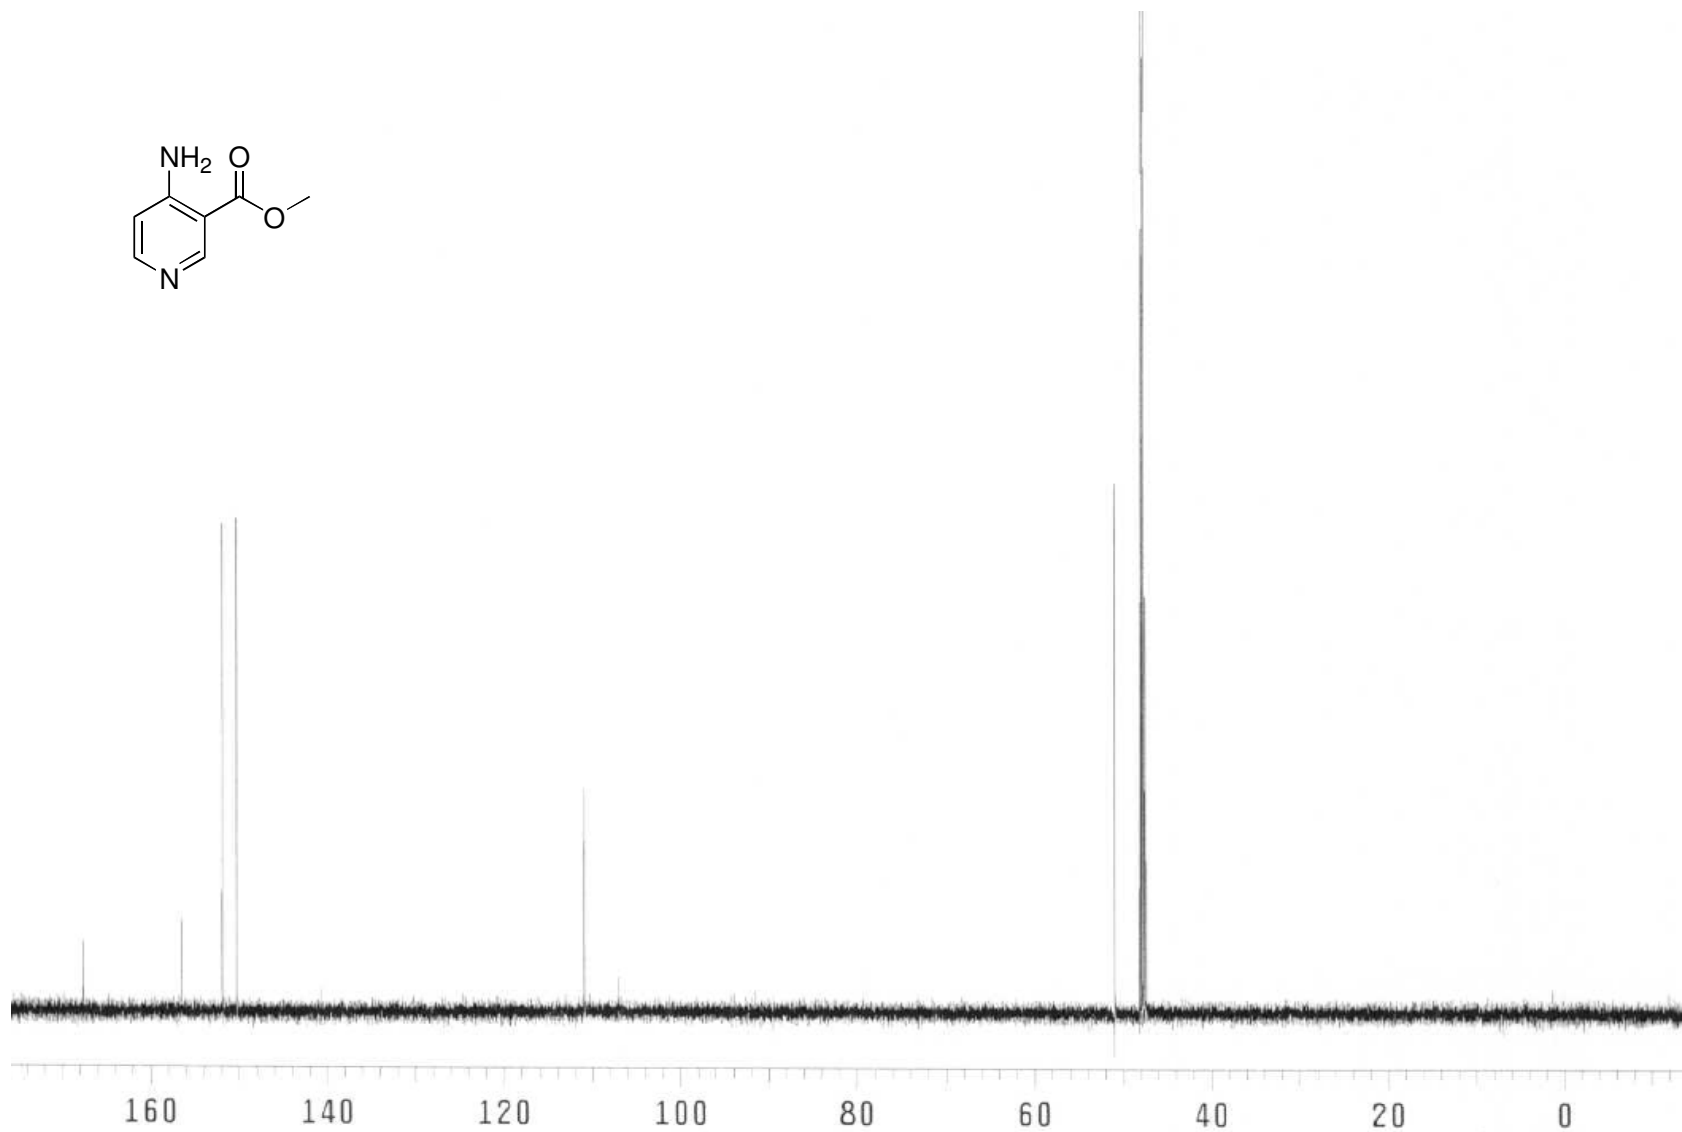

Figure S36. <sup>1</sup>H-NMR of **15**: 4-aminonicotinic acid methyl ester adenine dinucleotide phosphate

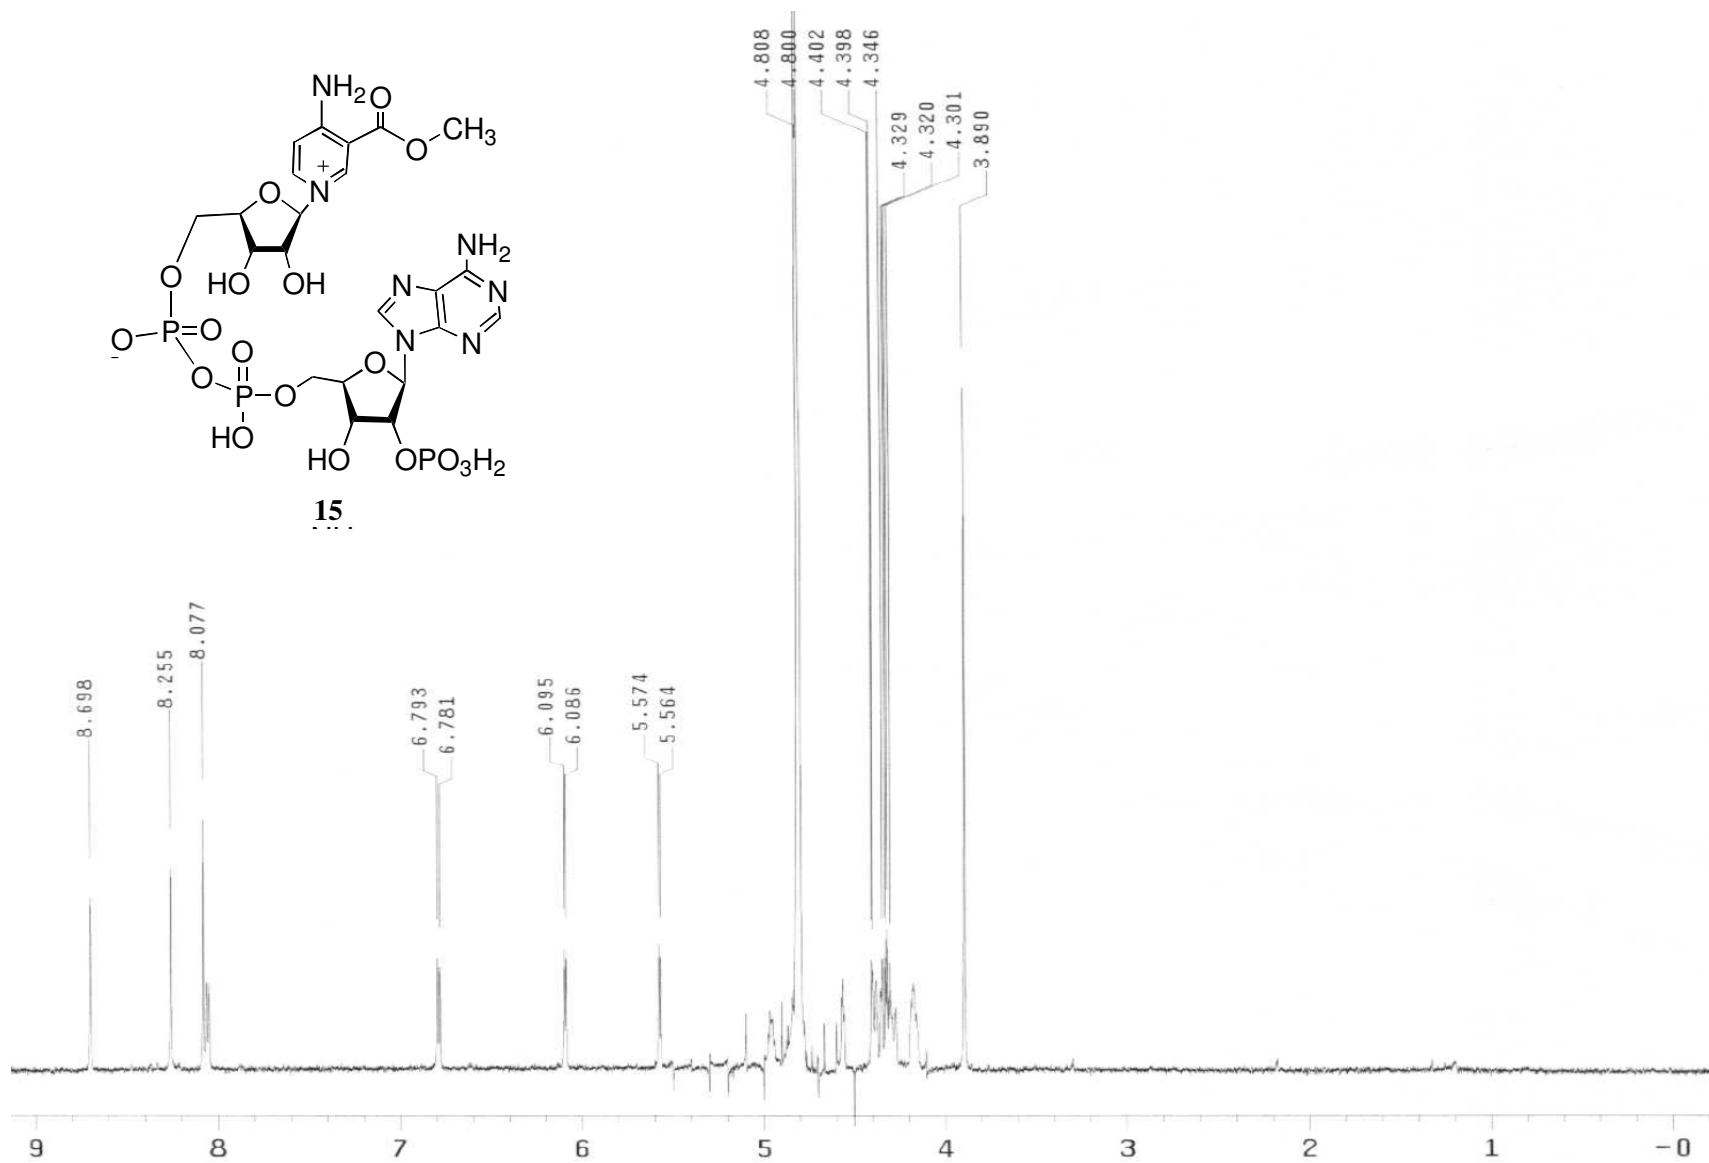



Figure S37.  $^{31}\text{P}$ -NMR of **2c**: 4-aminonicotinic acid methyl ester adenine dinucleotide phosphate

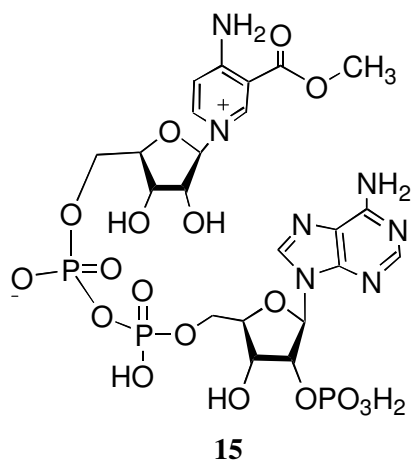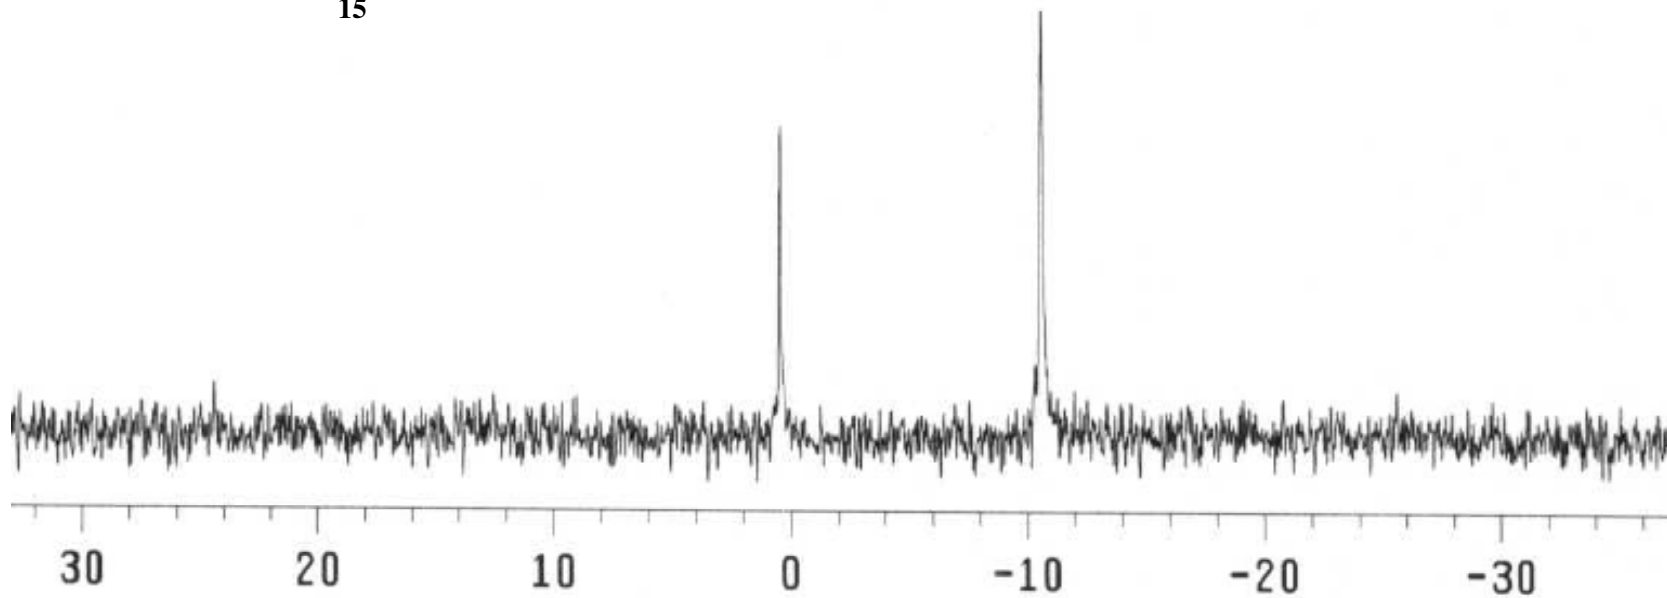

Figure S38.  $^1\text{H-NMR}$  of **16**: 4-amino-NAADP

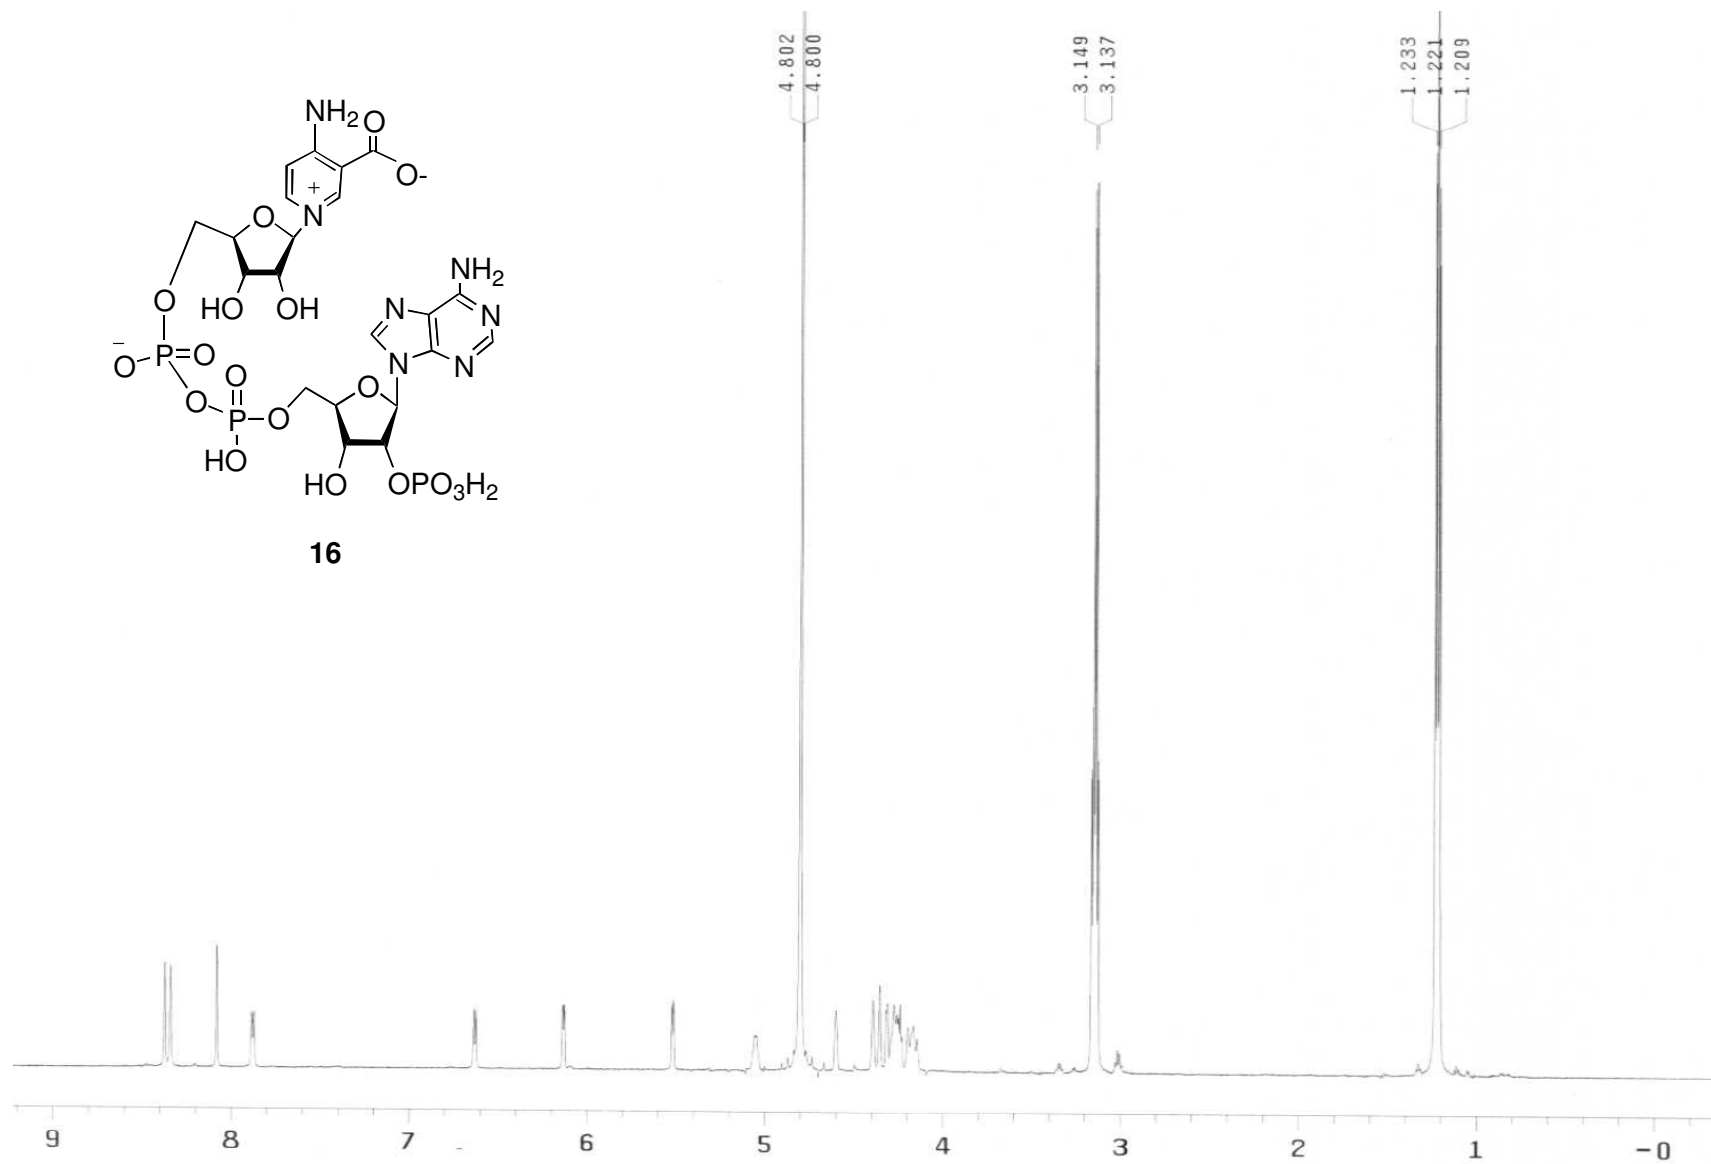

Figure S39.  $^{31}\text{P}$ -NMR of **16**: 4-amino-NAADP

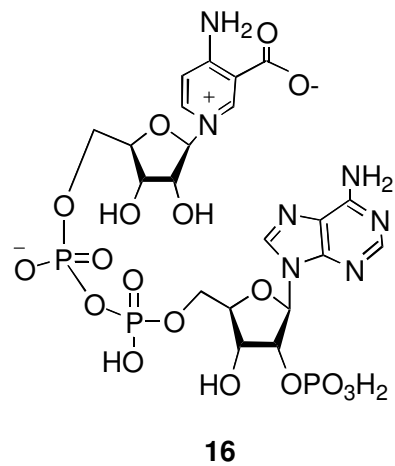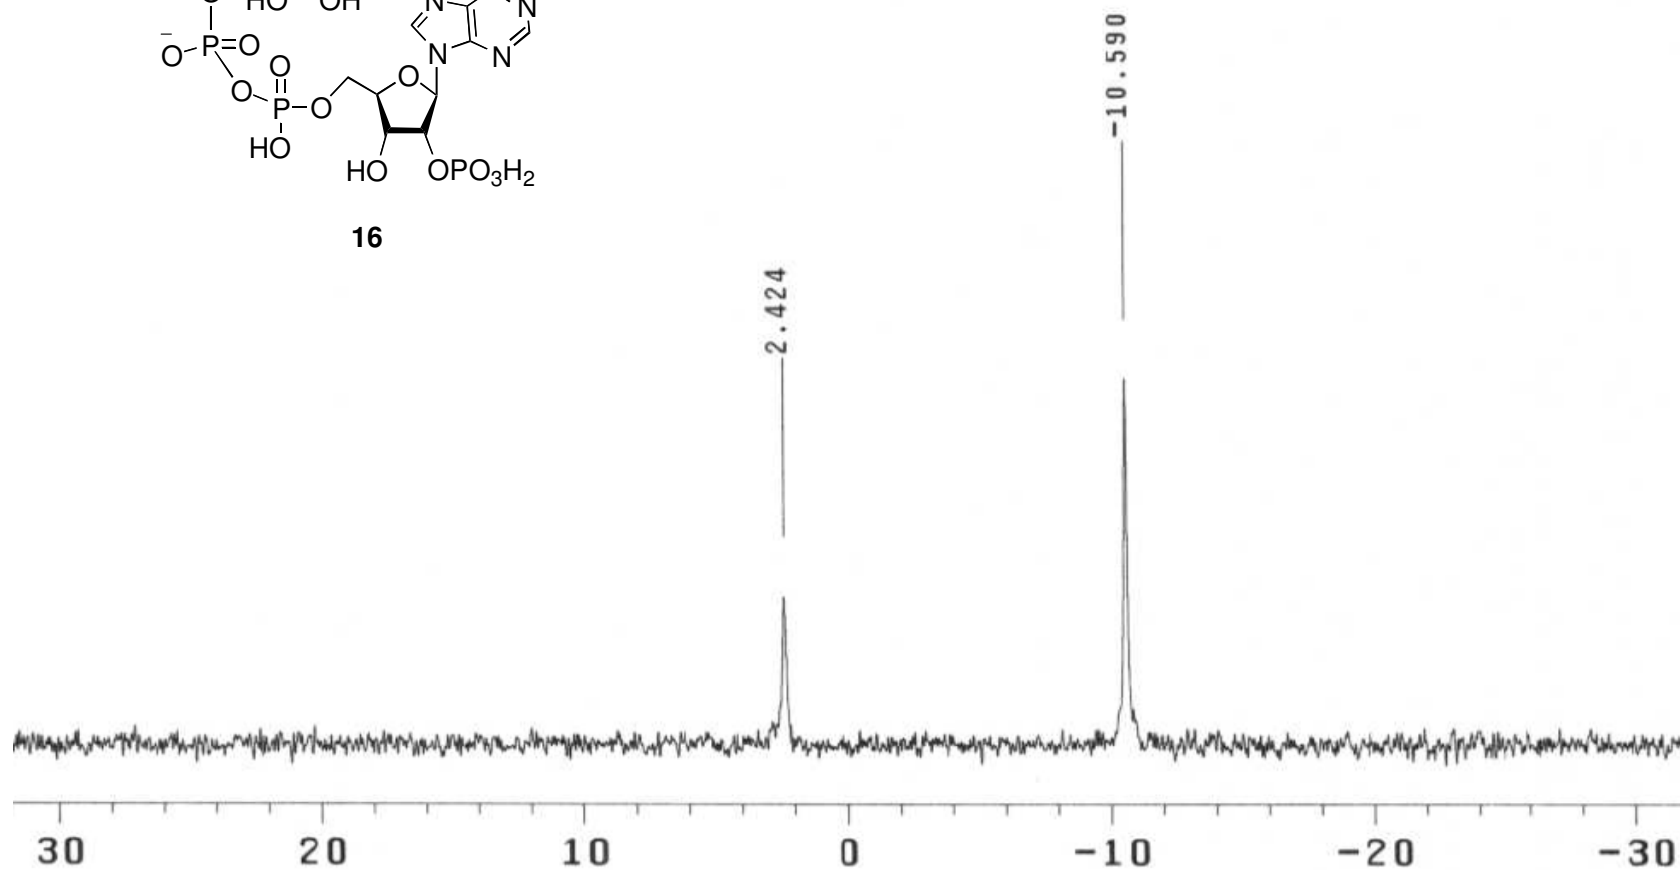

Figure S40.  $^1\text{H-NMR}$  of **17**: 4-methyl-NAADP

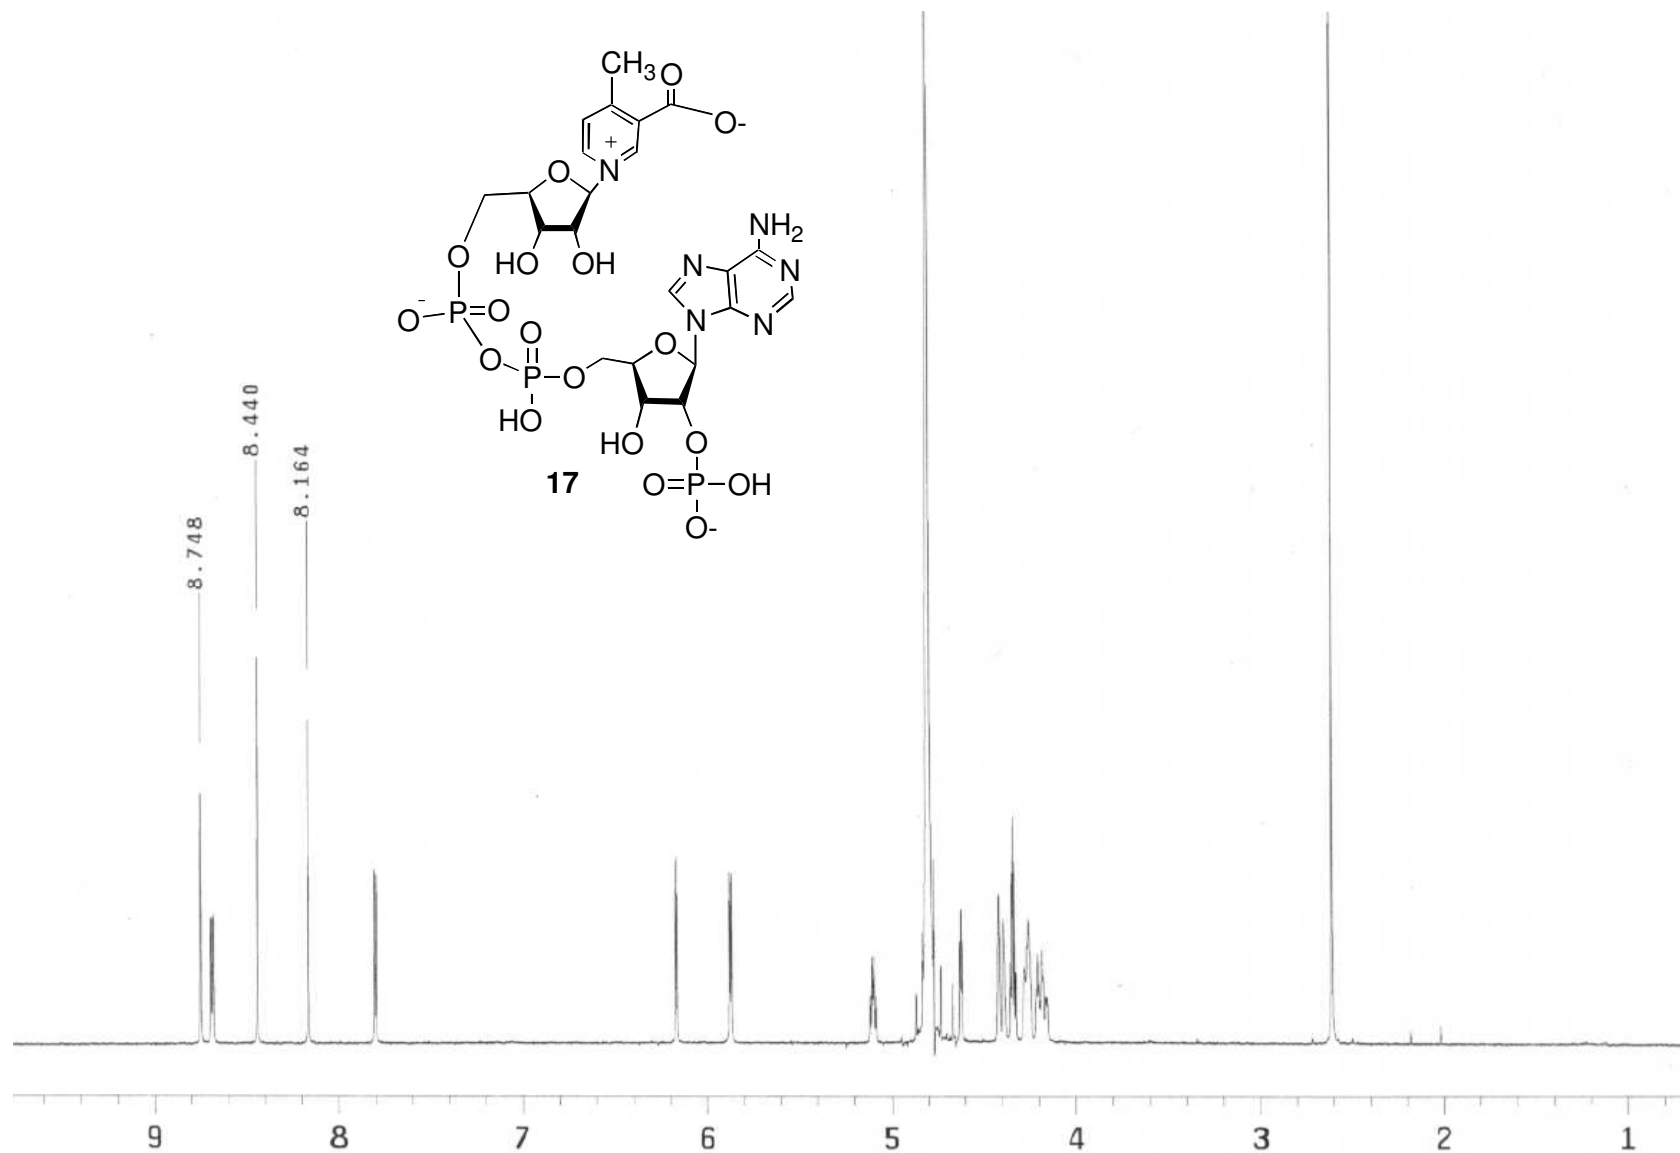

Figure S41.  $^{31}\text{P}$ -NMR of **17**: 4-methyl-NAADP

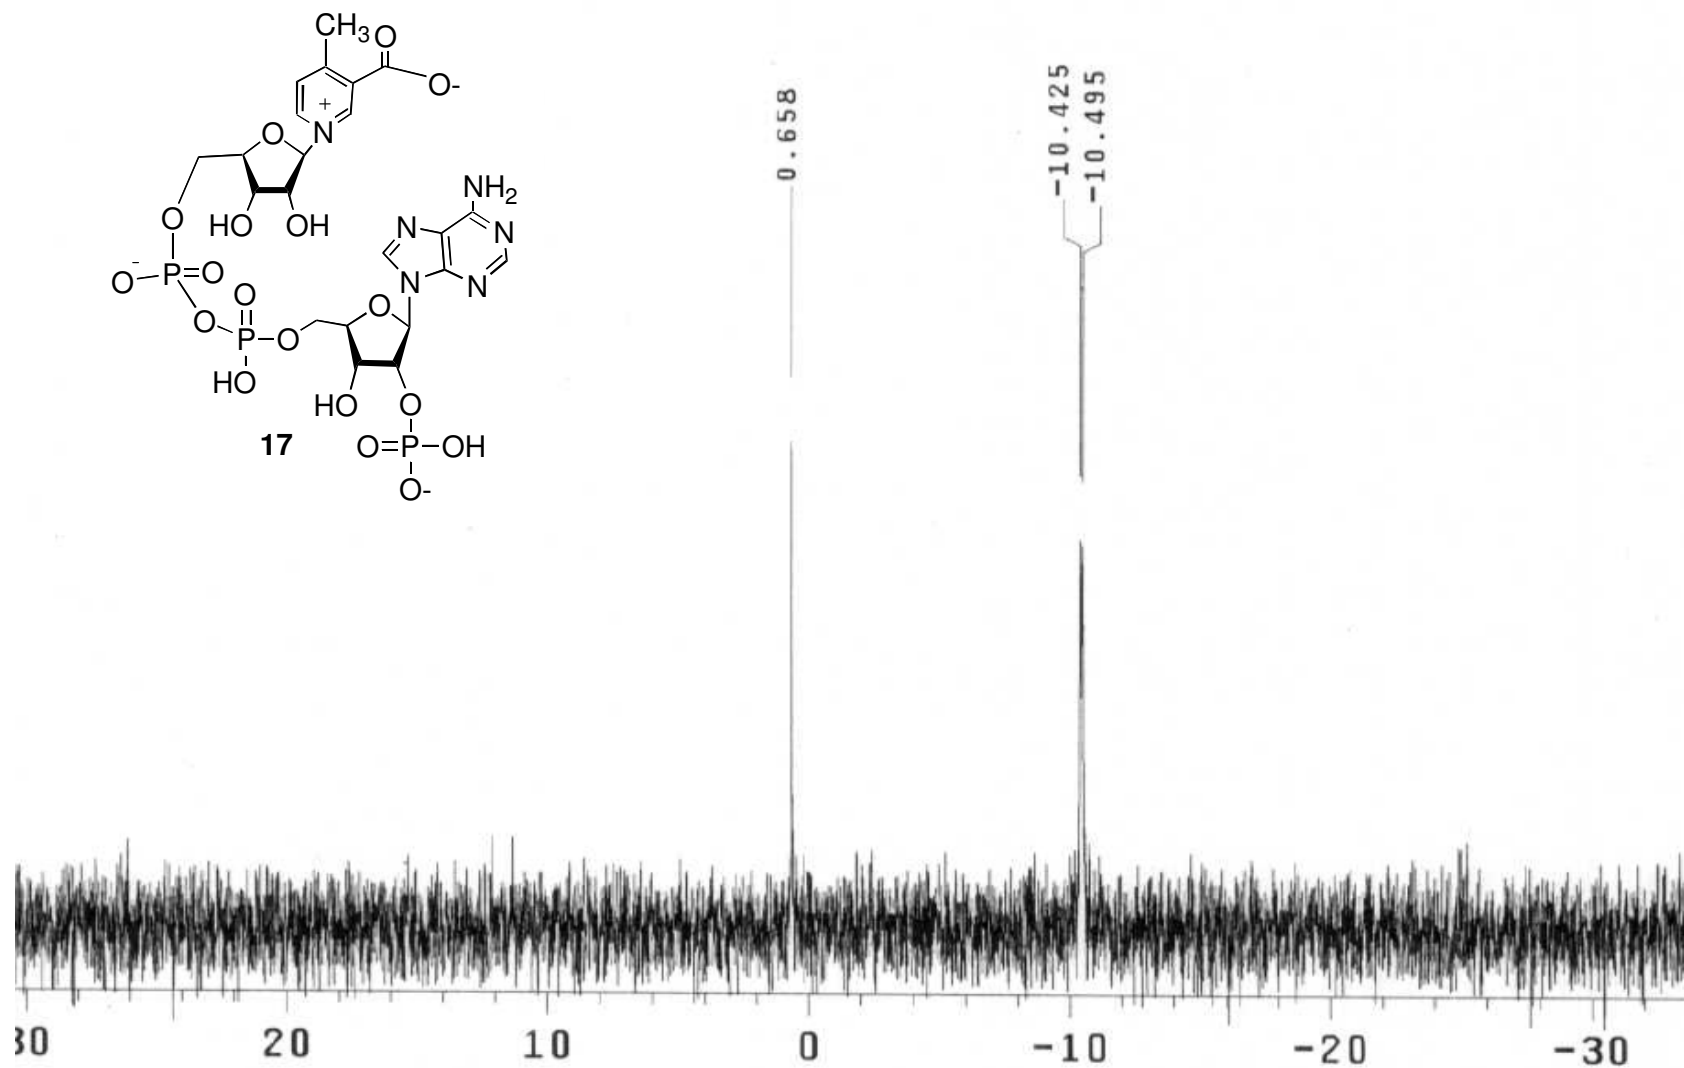

Figure S42. <sup>1</sup>H-NMR of **18**: 4-*n*-butyl-NAADP

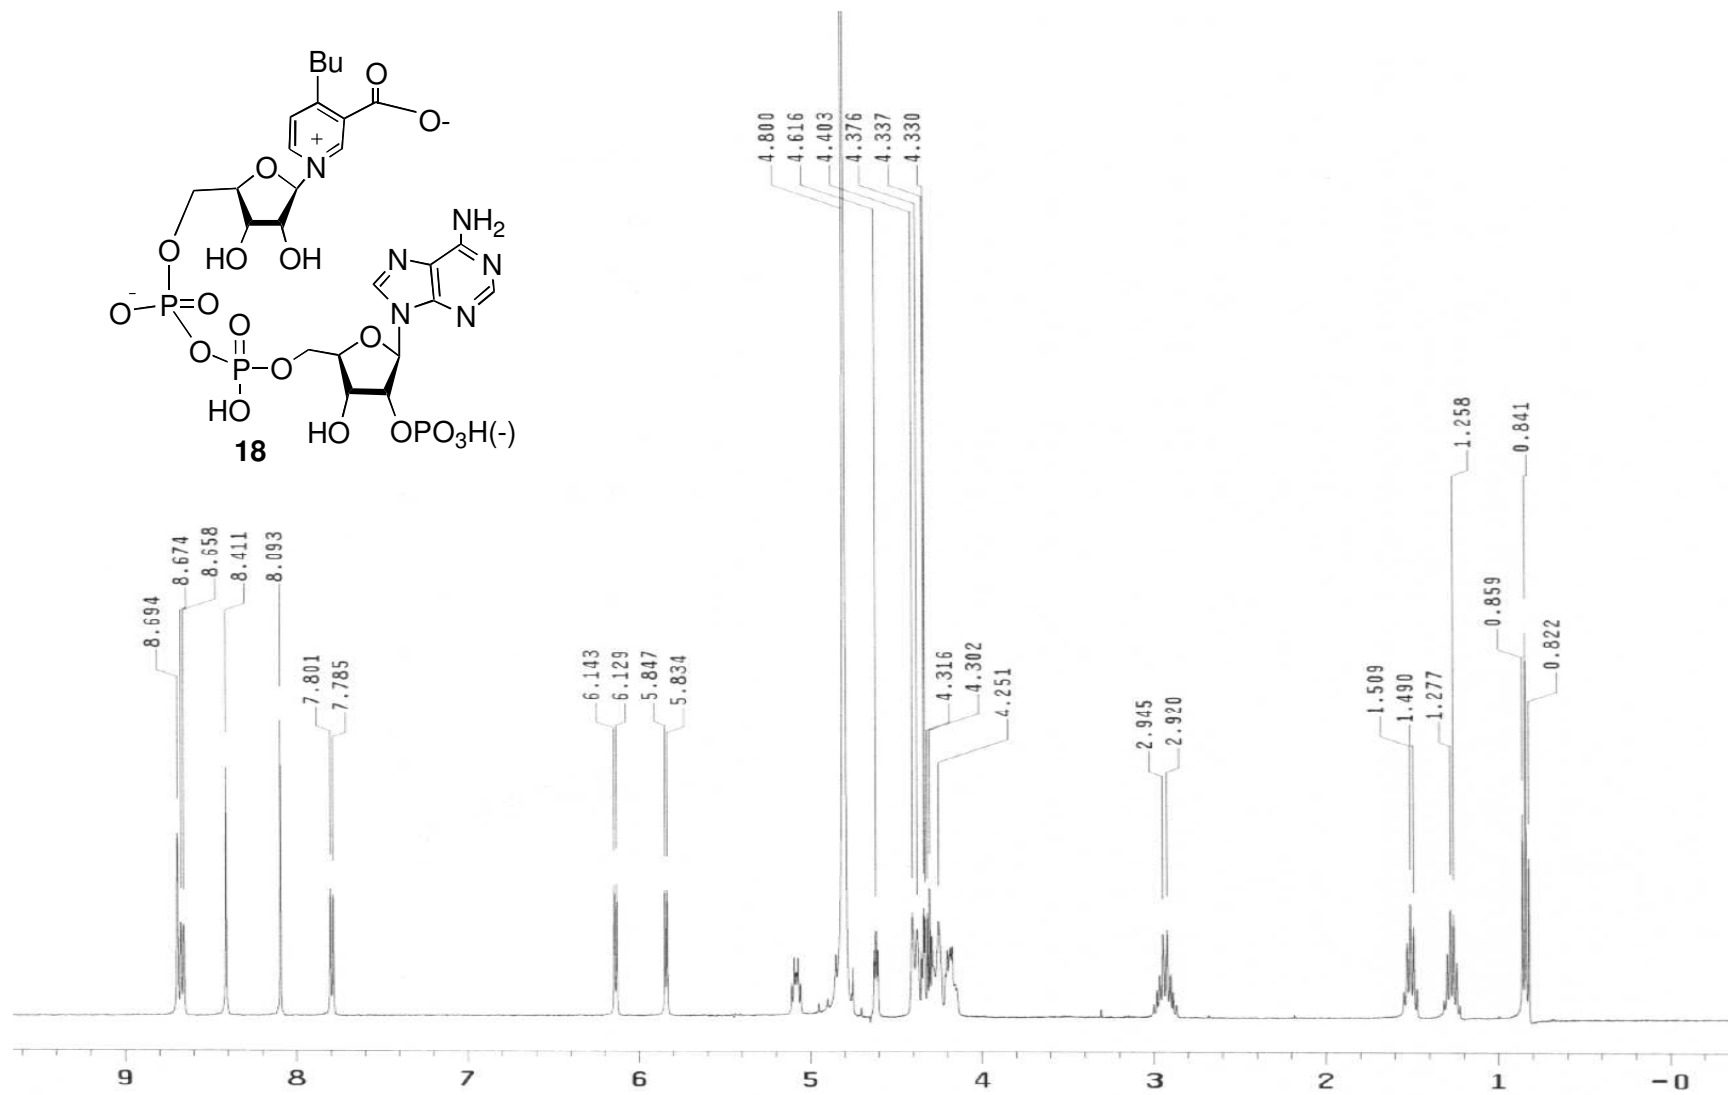

Figure S43. <sup>1</sup>H-NMR of **19**: 4-phenyl-NAADP

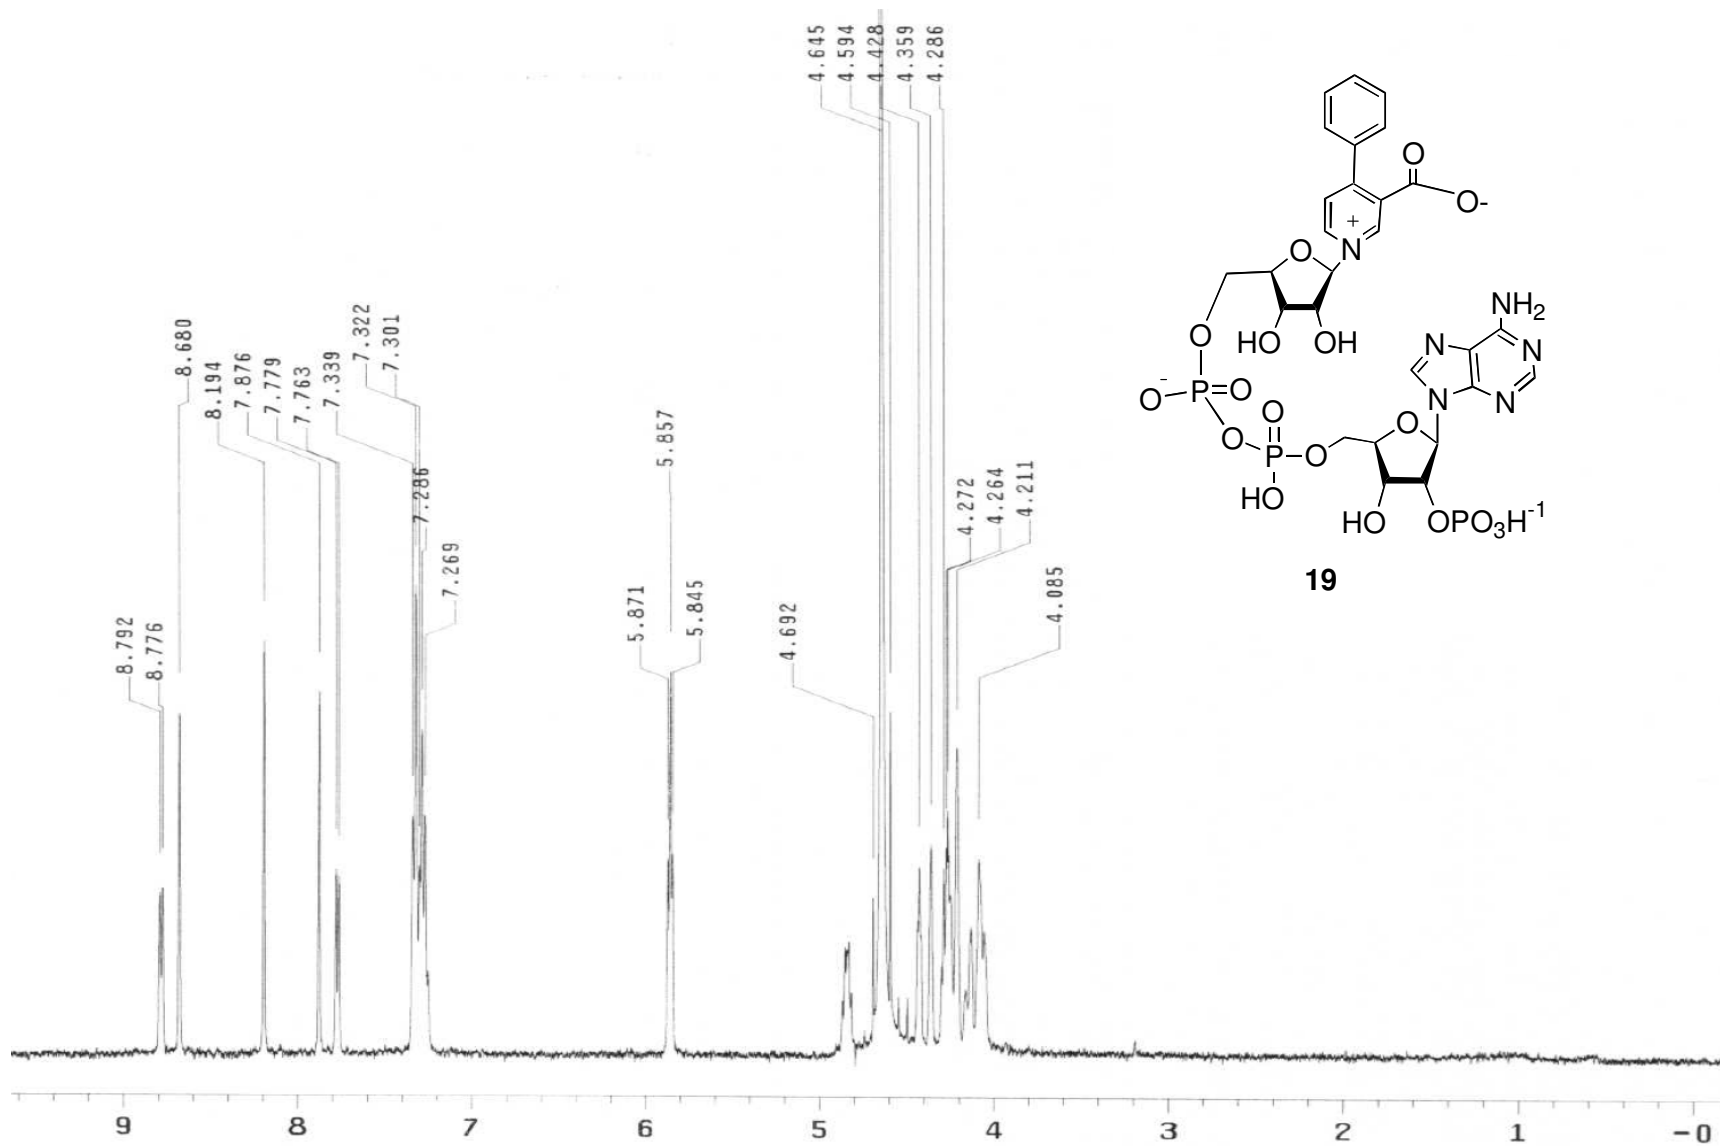

Figure S44.  $^{31}\text{P}$ -NMR of **19**: 4-phenyl-NAADP

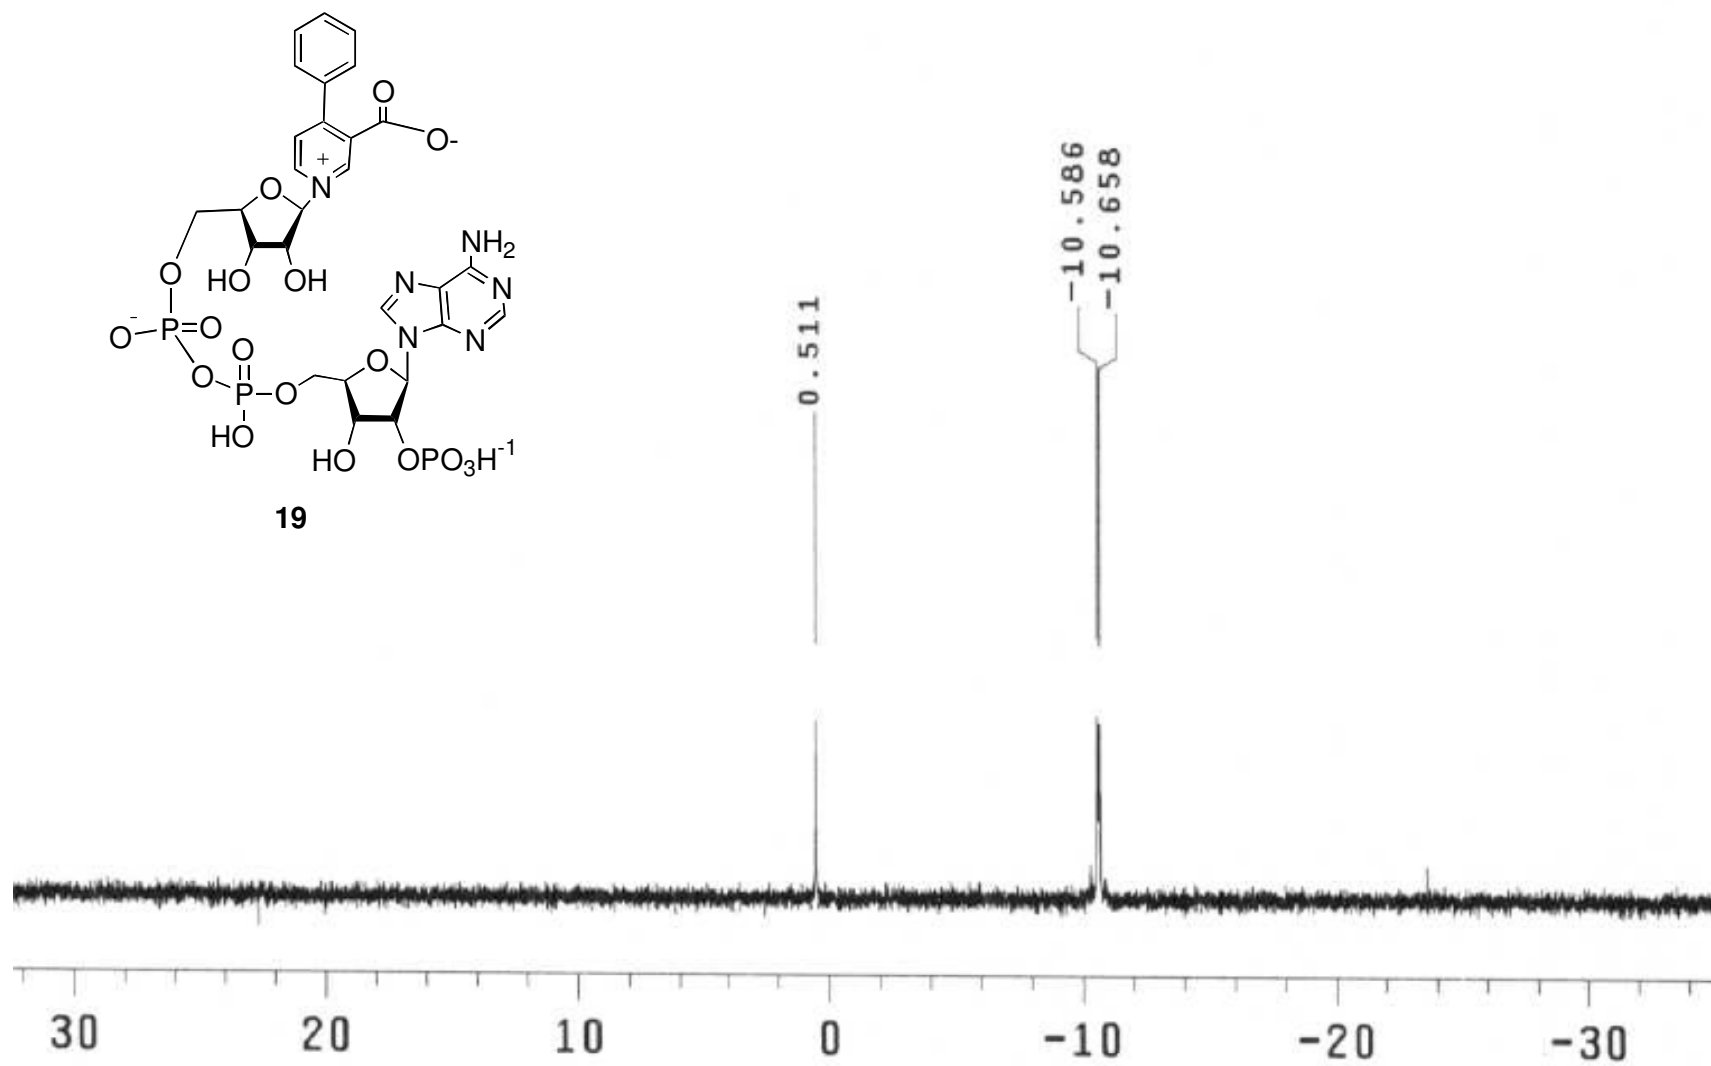



Figure S45.  $^1\text{H-NMR}$  of **20**: 5-amino-NAADP

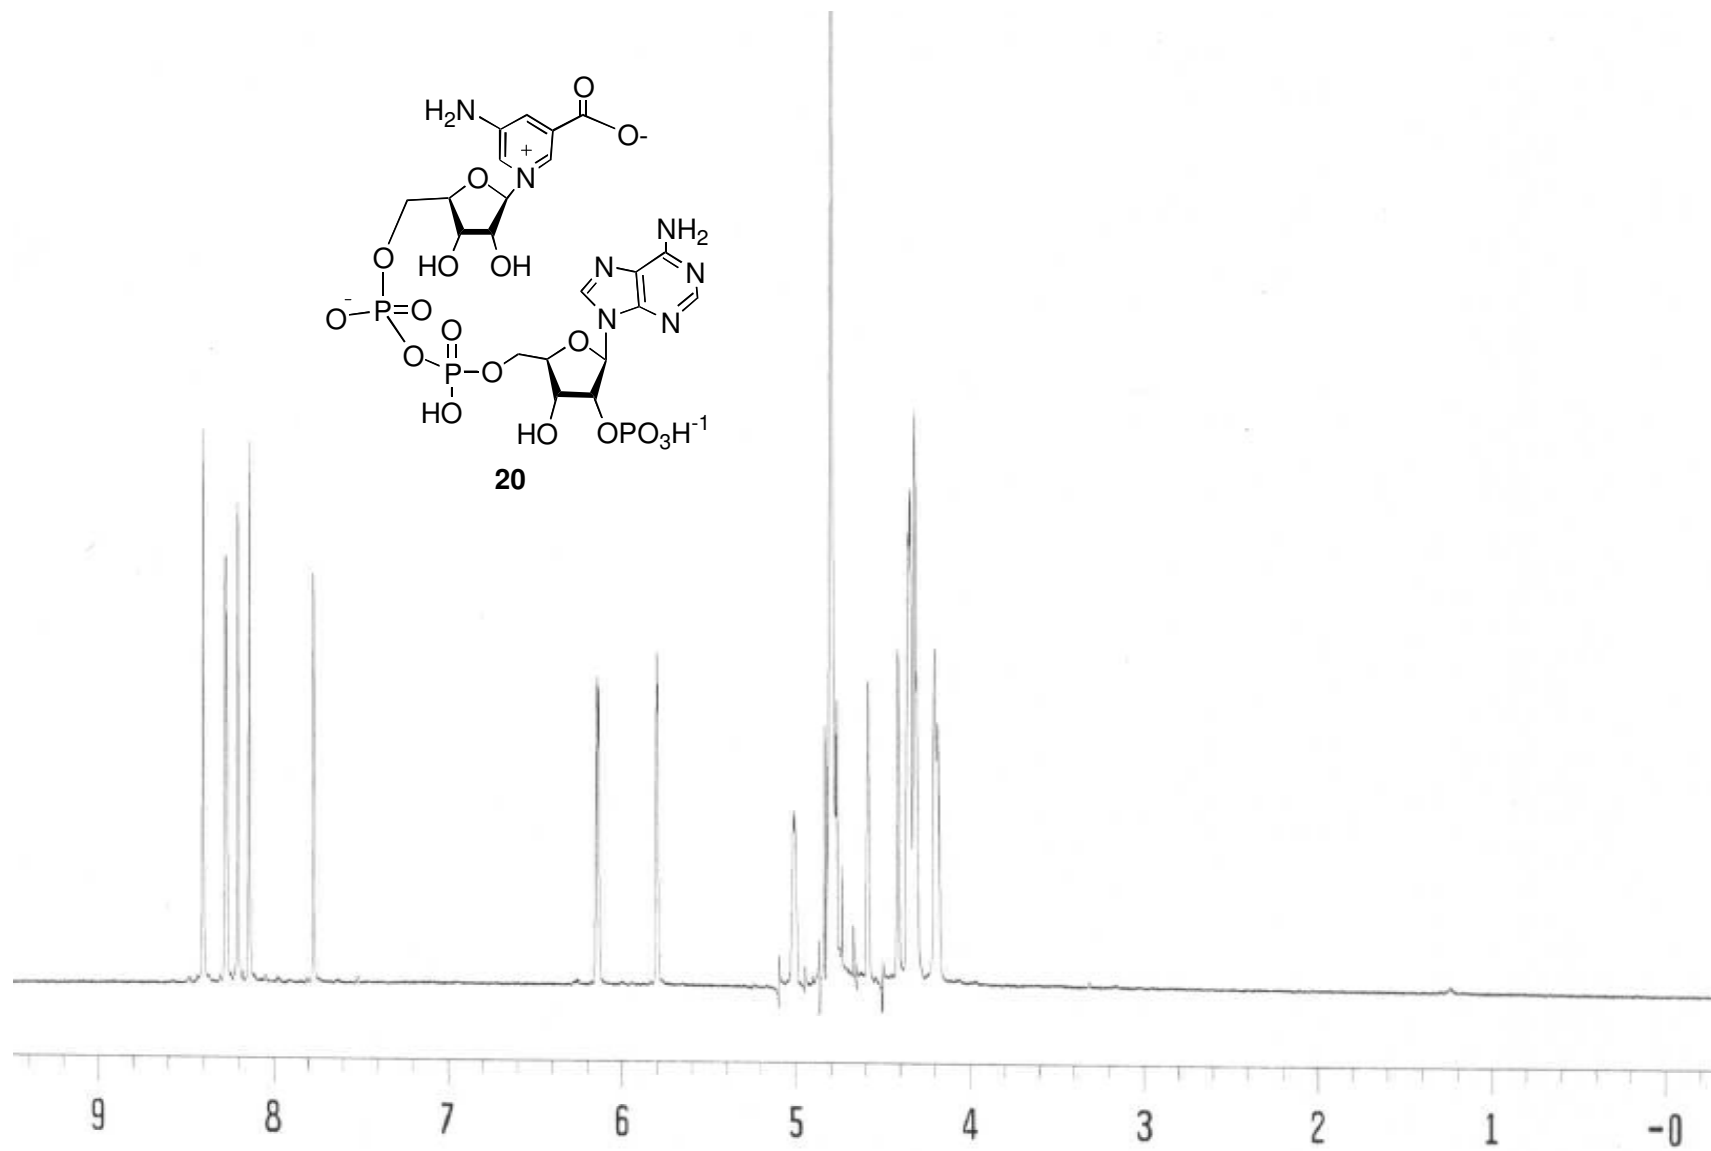

Figure S46.  $^{31}\text{P}$ -NMR of **20**: 5-amino-NAADP

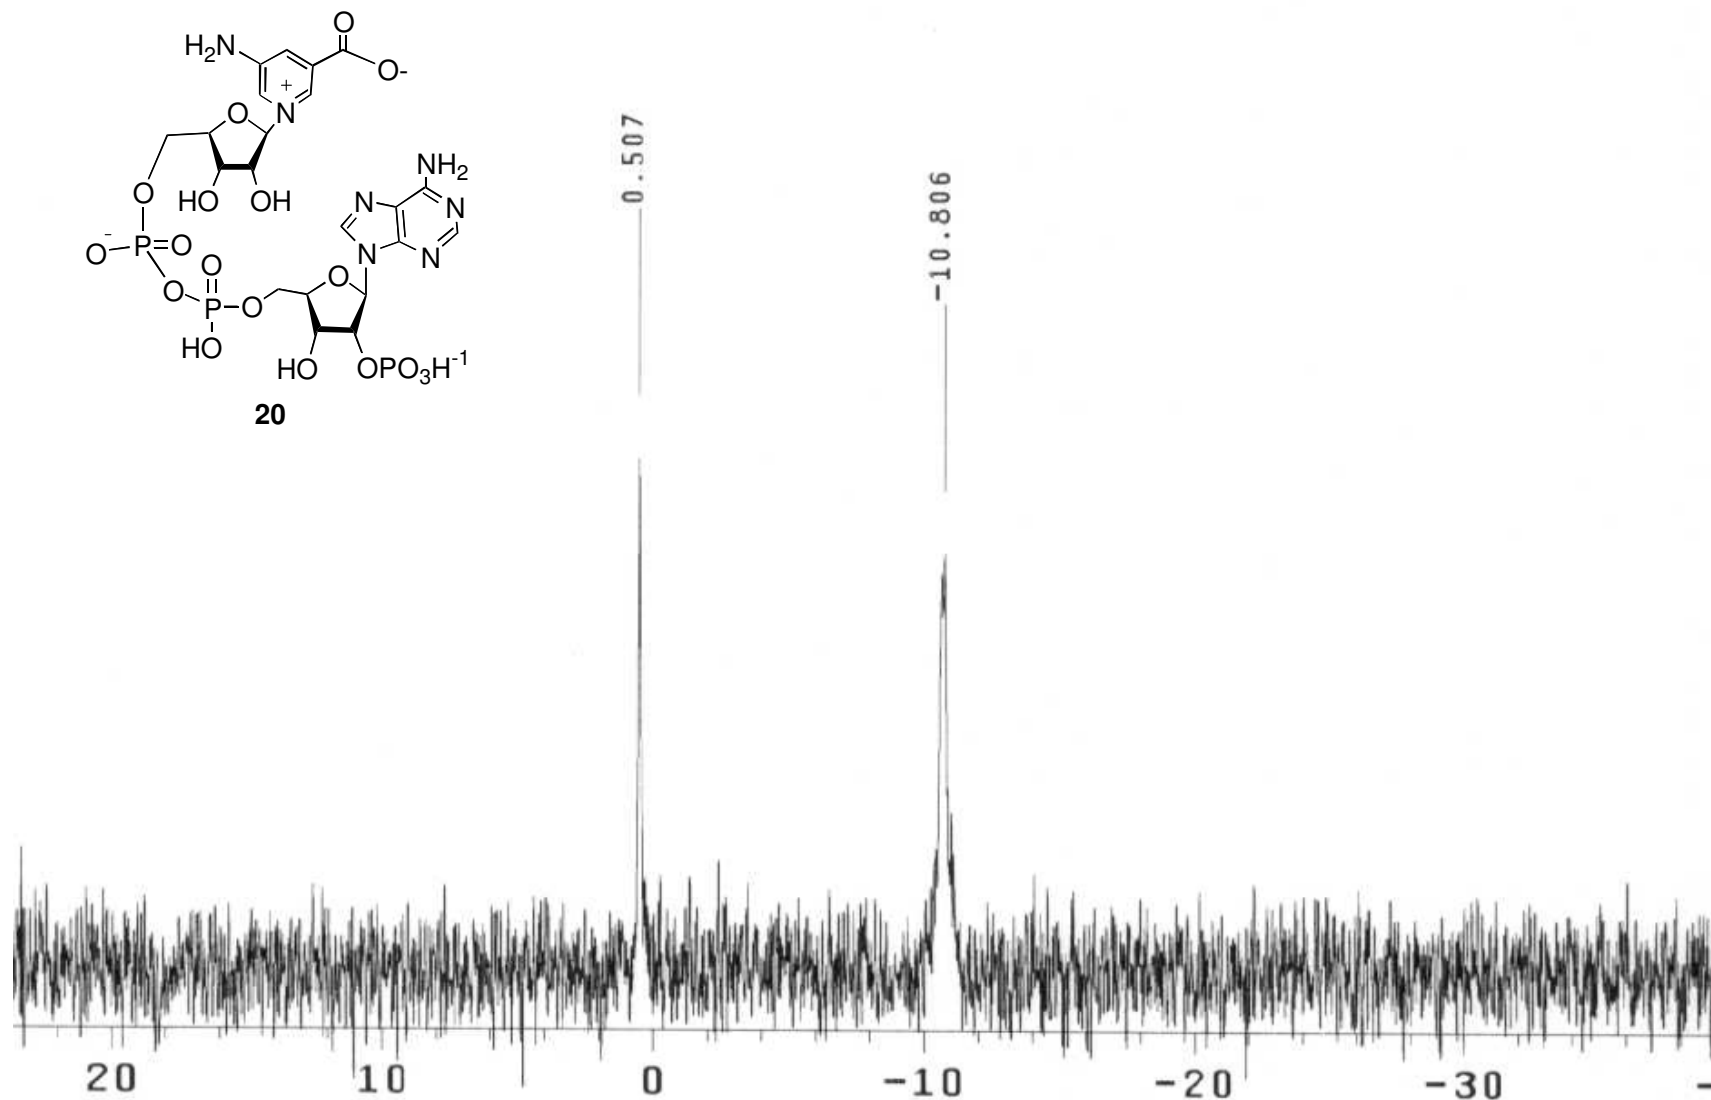

Figure S47.  $^1\text{H-NMR}$  of **21**: 5-methyl-NAADP

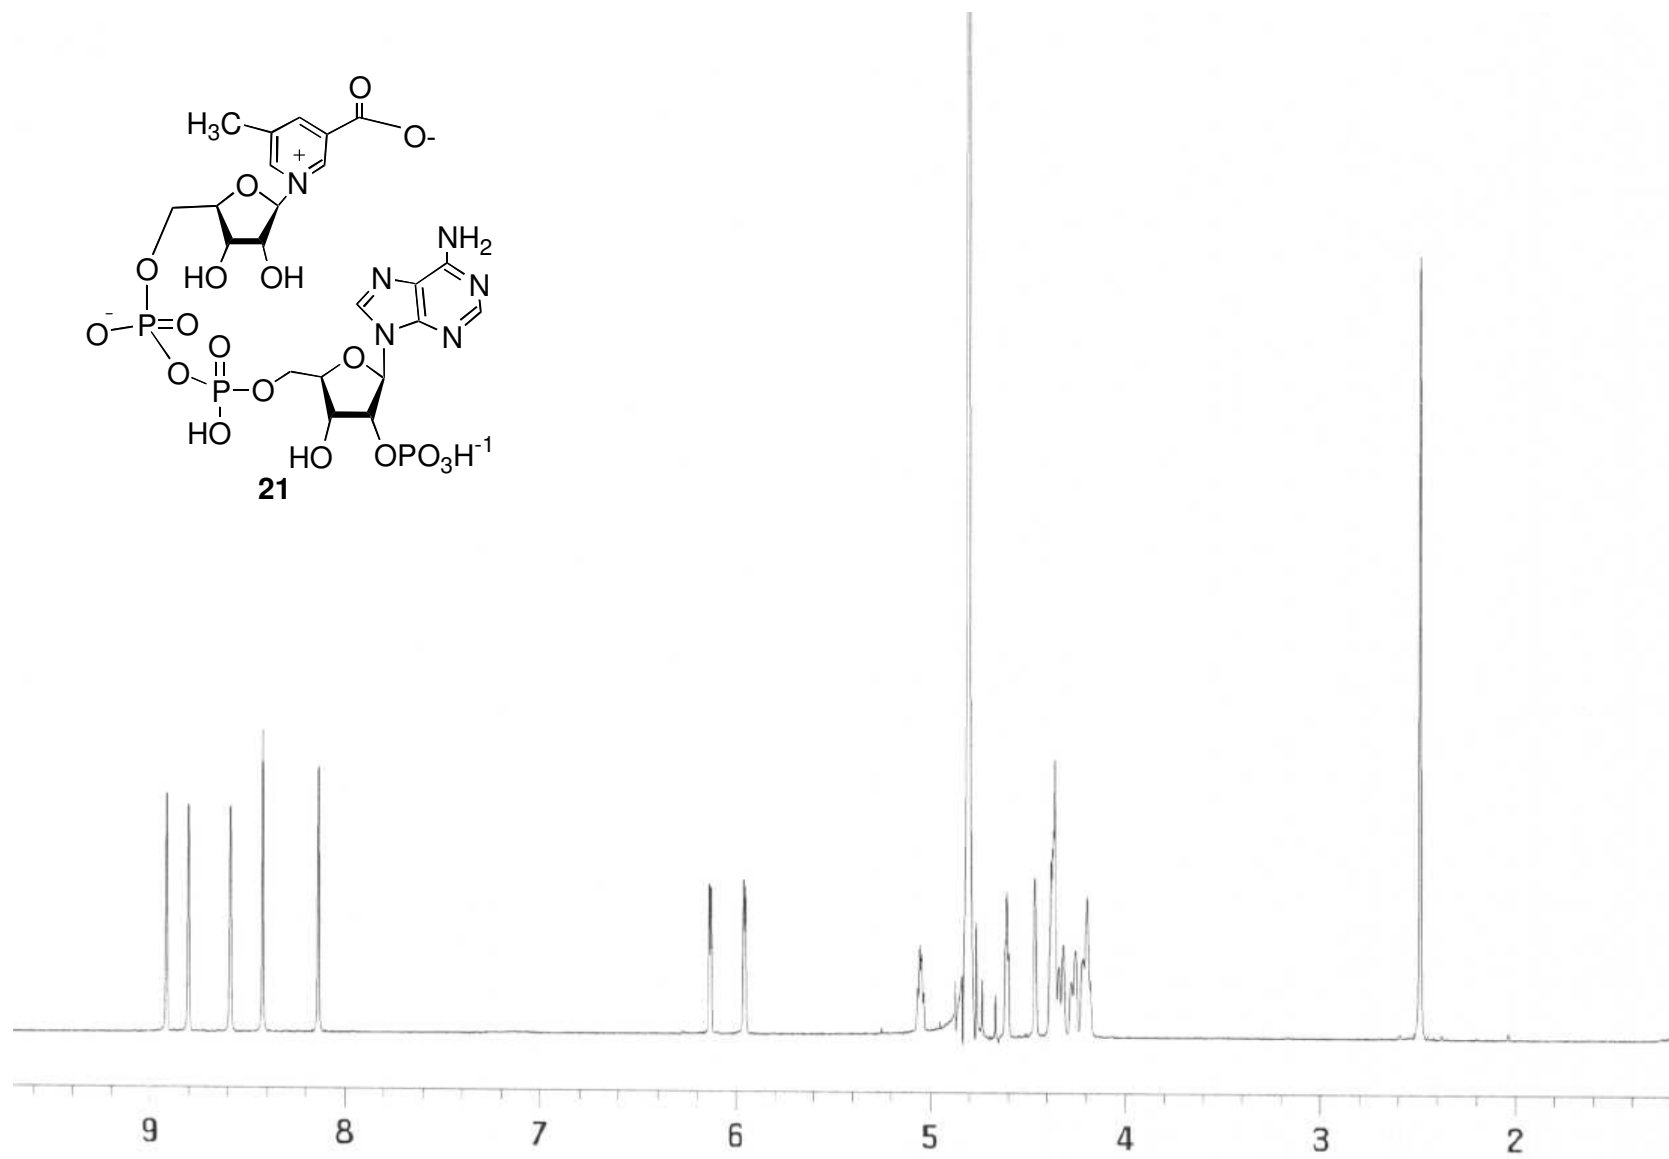

Figure S48.  $^{31}\text{P}$ -NMR of **21**: 5-methyl-NAADP

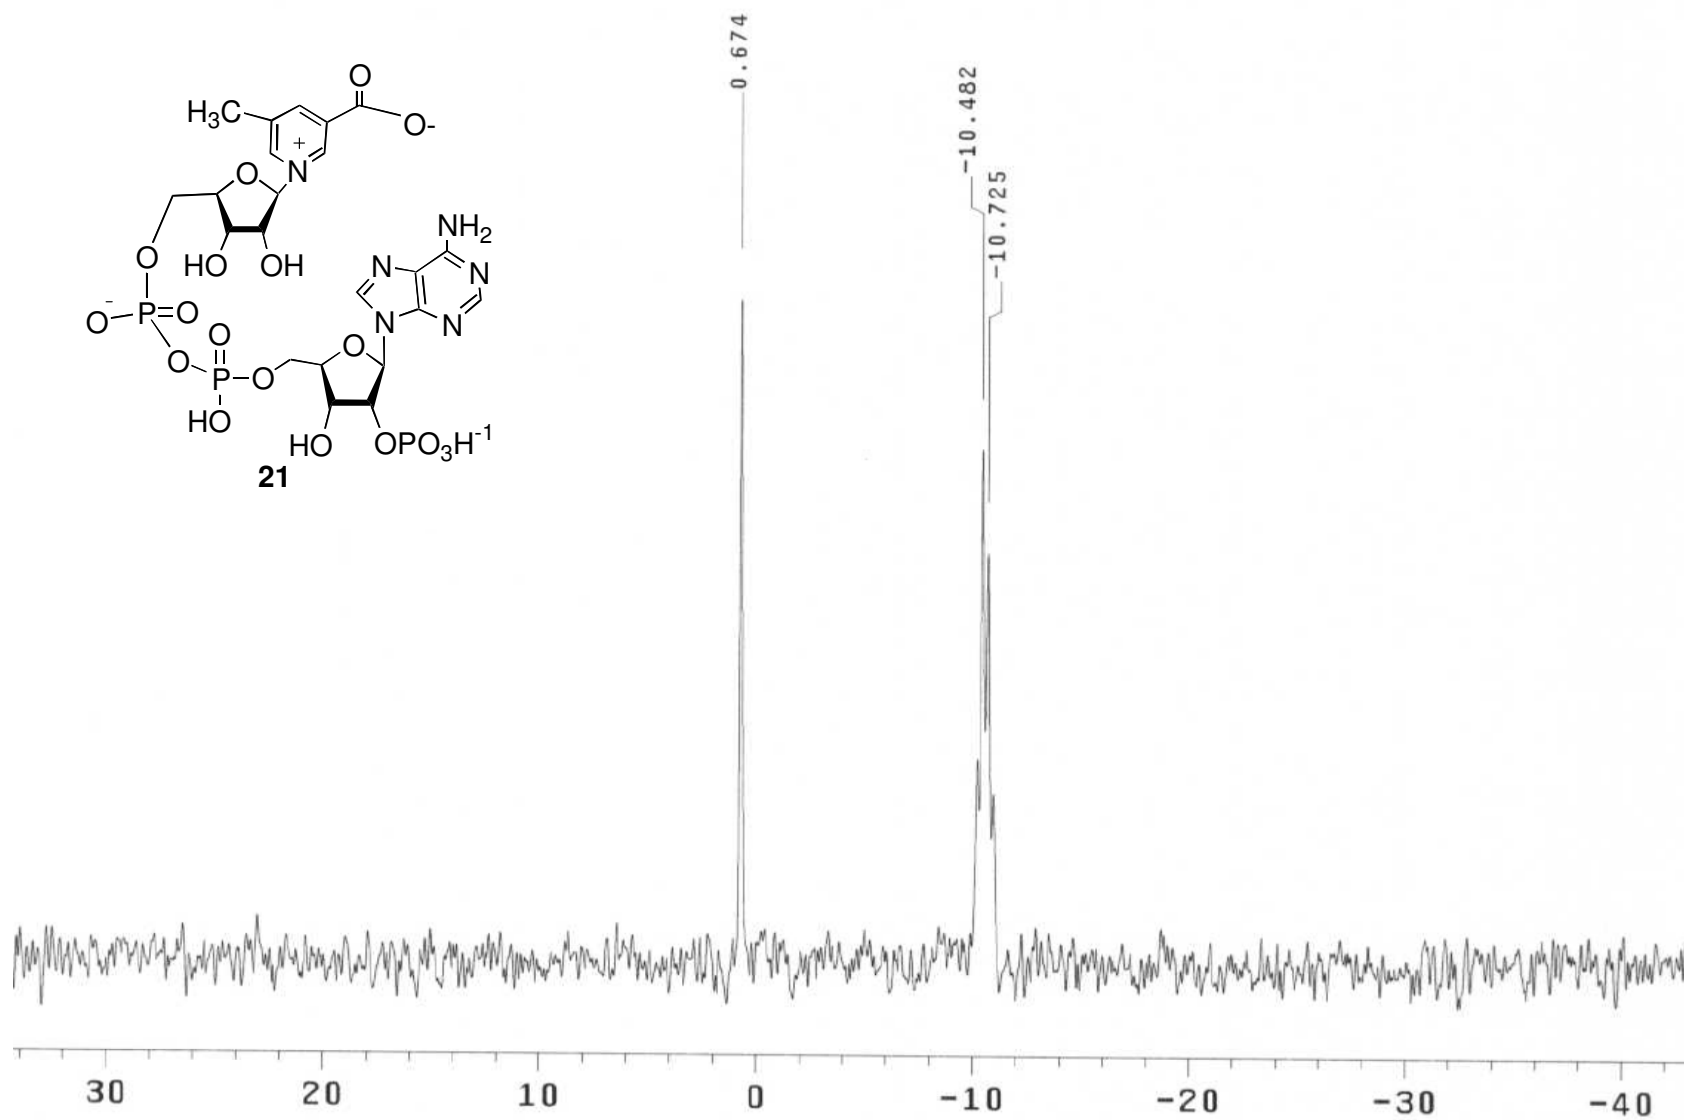

Figure S49. <sup>1</sup>H-NMR of **22**: 5-carboxy-NAADP

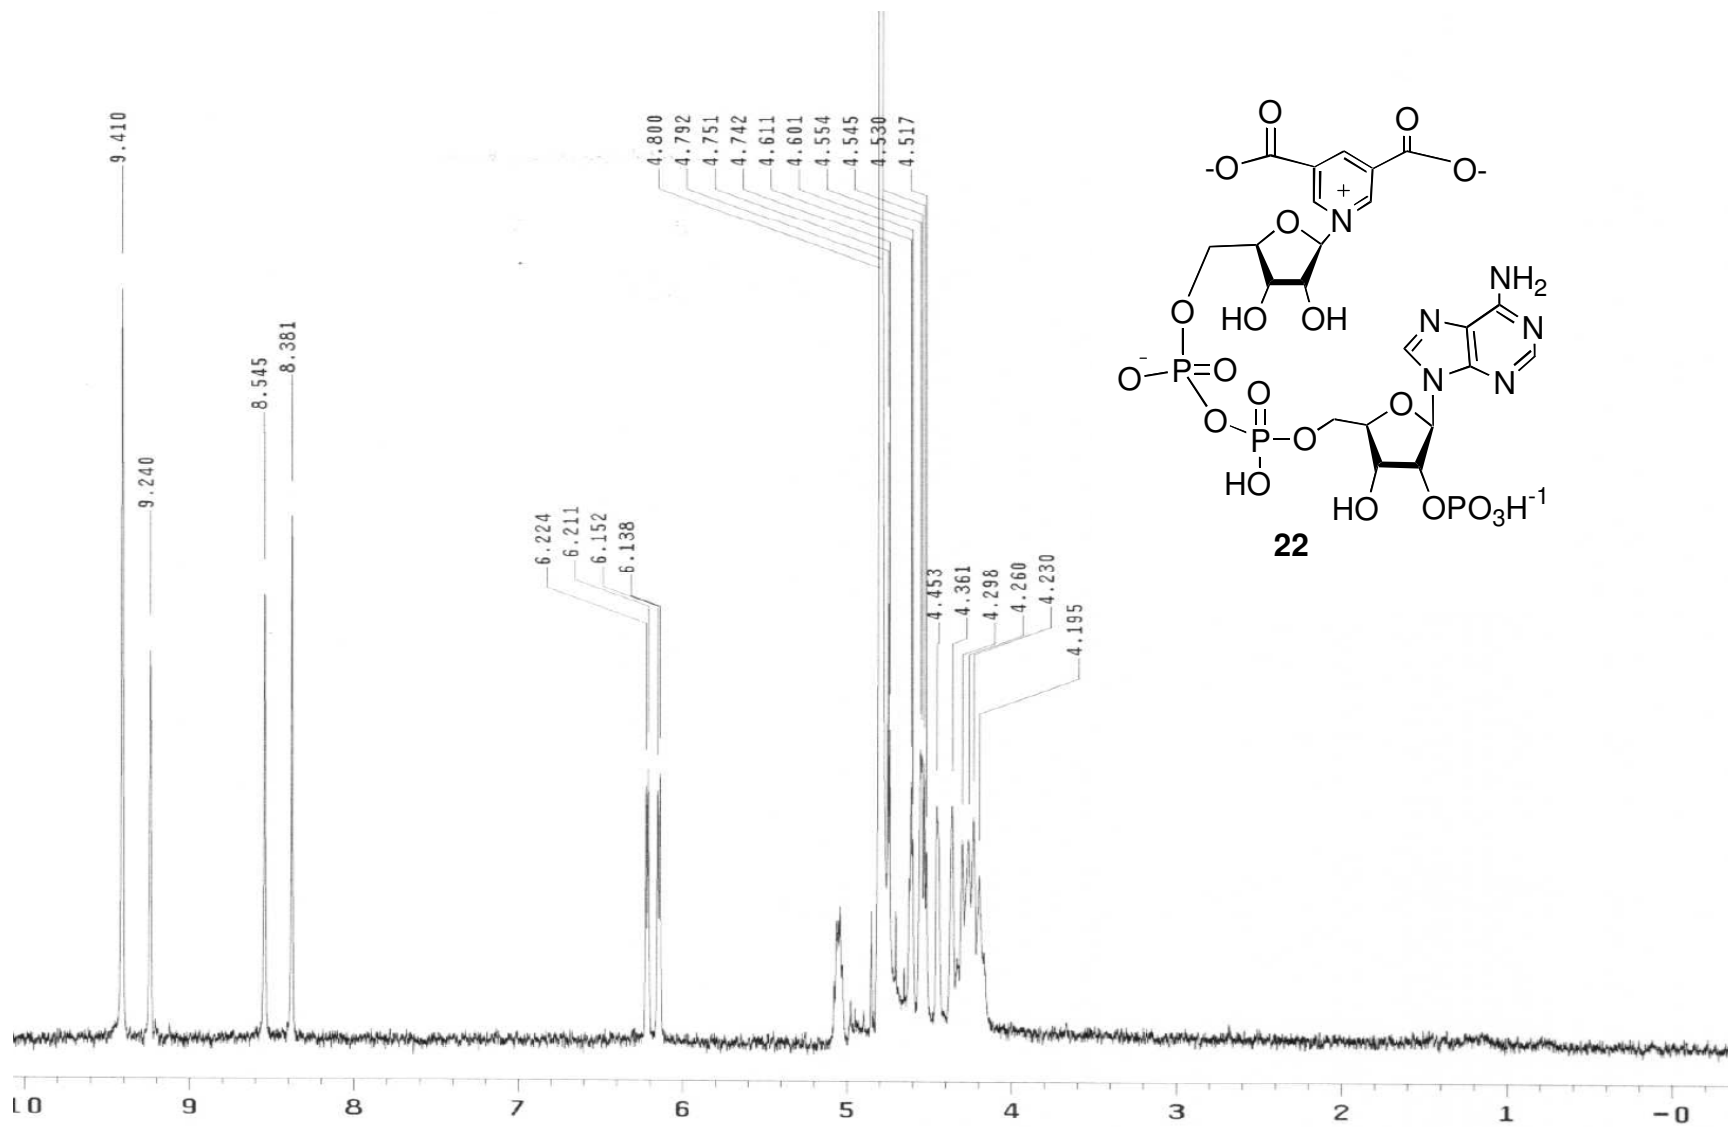

Figure S50.  $^{31}\text{P}$ -NMR of **22**: 5-carboxy-NAADP

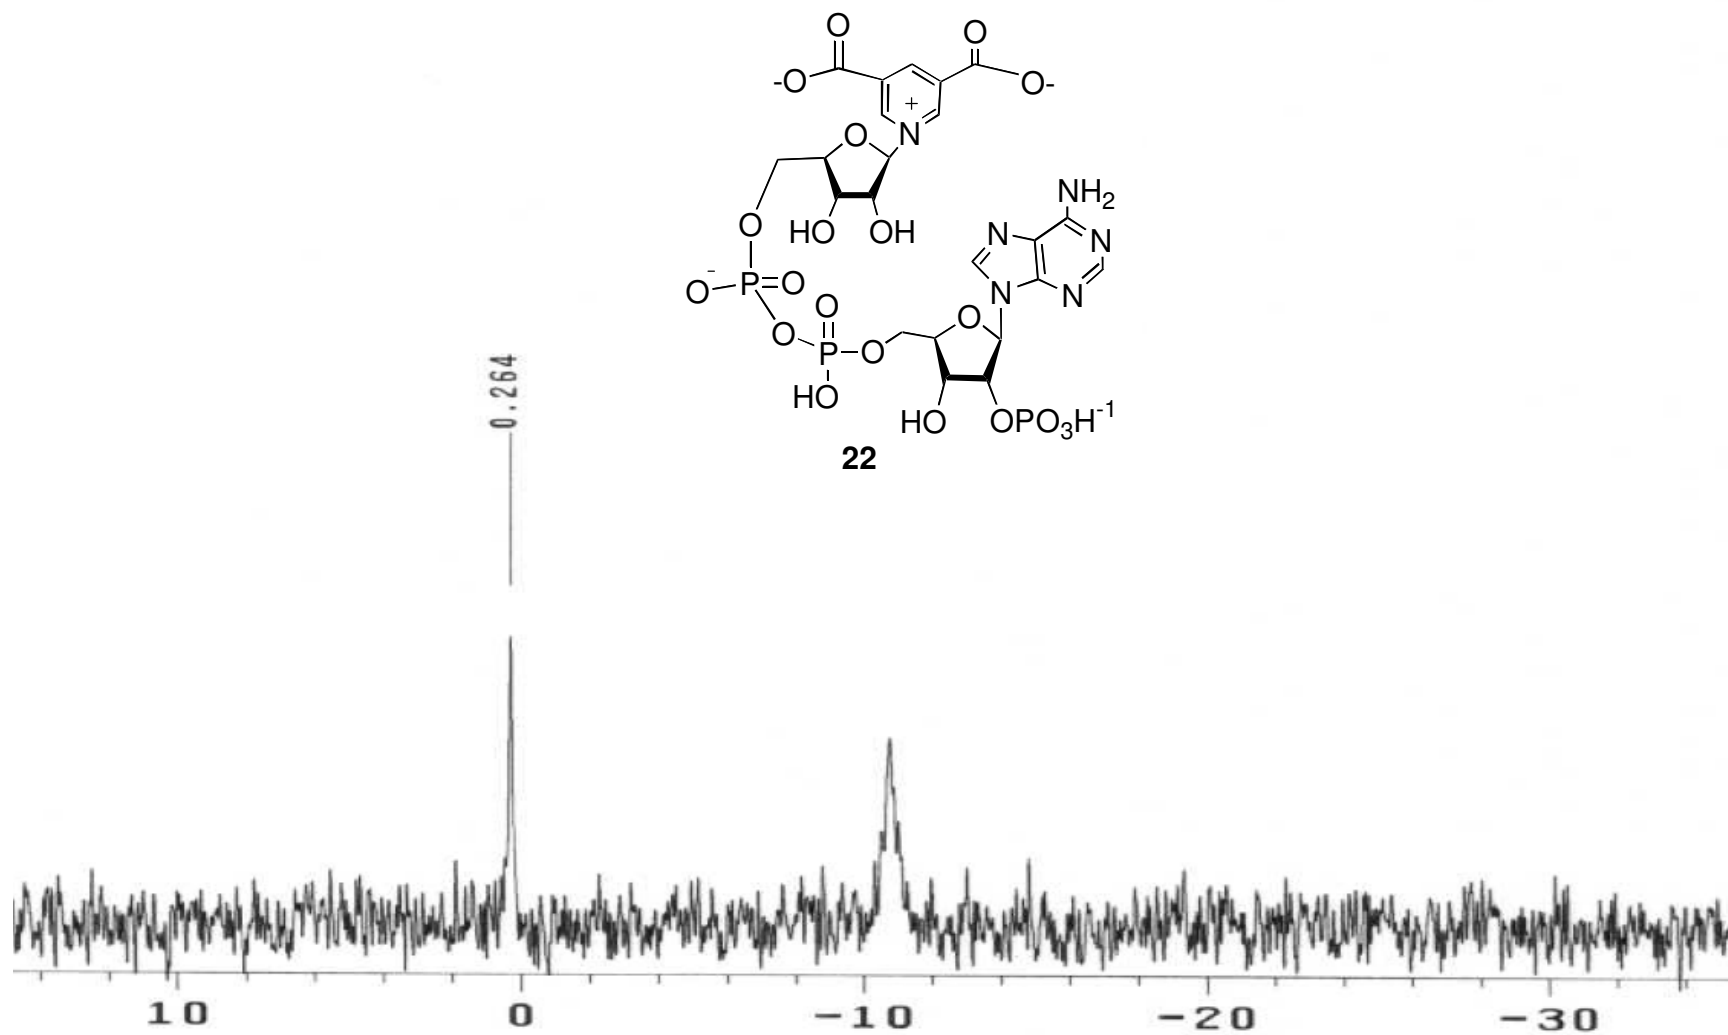

Figure S51. <sup>1</sup>H-NMR of **23**: 5-ethyl-NAADP

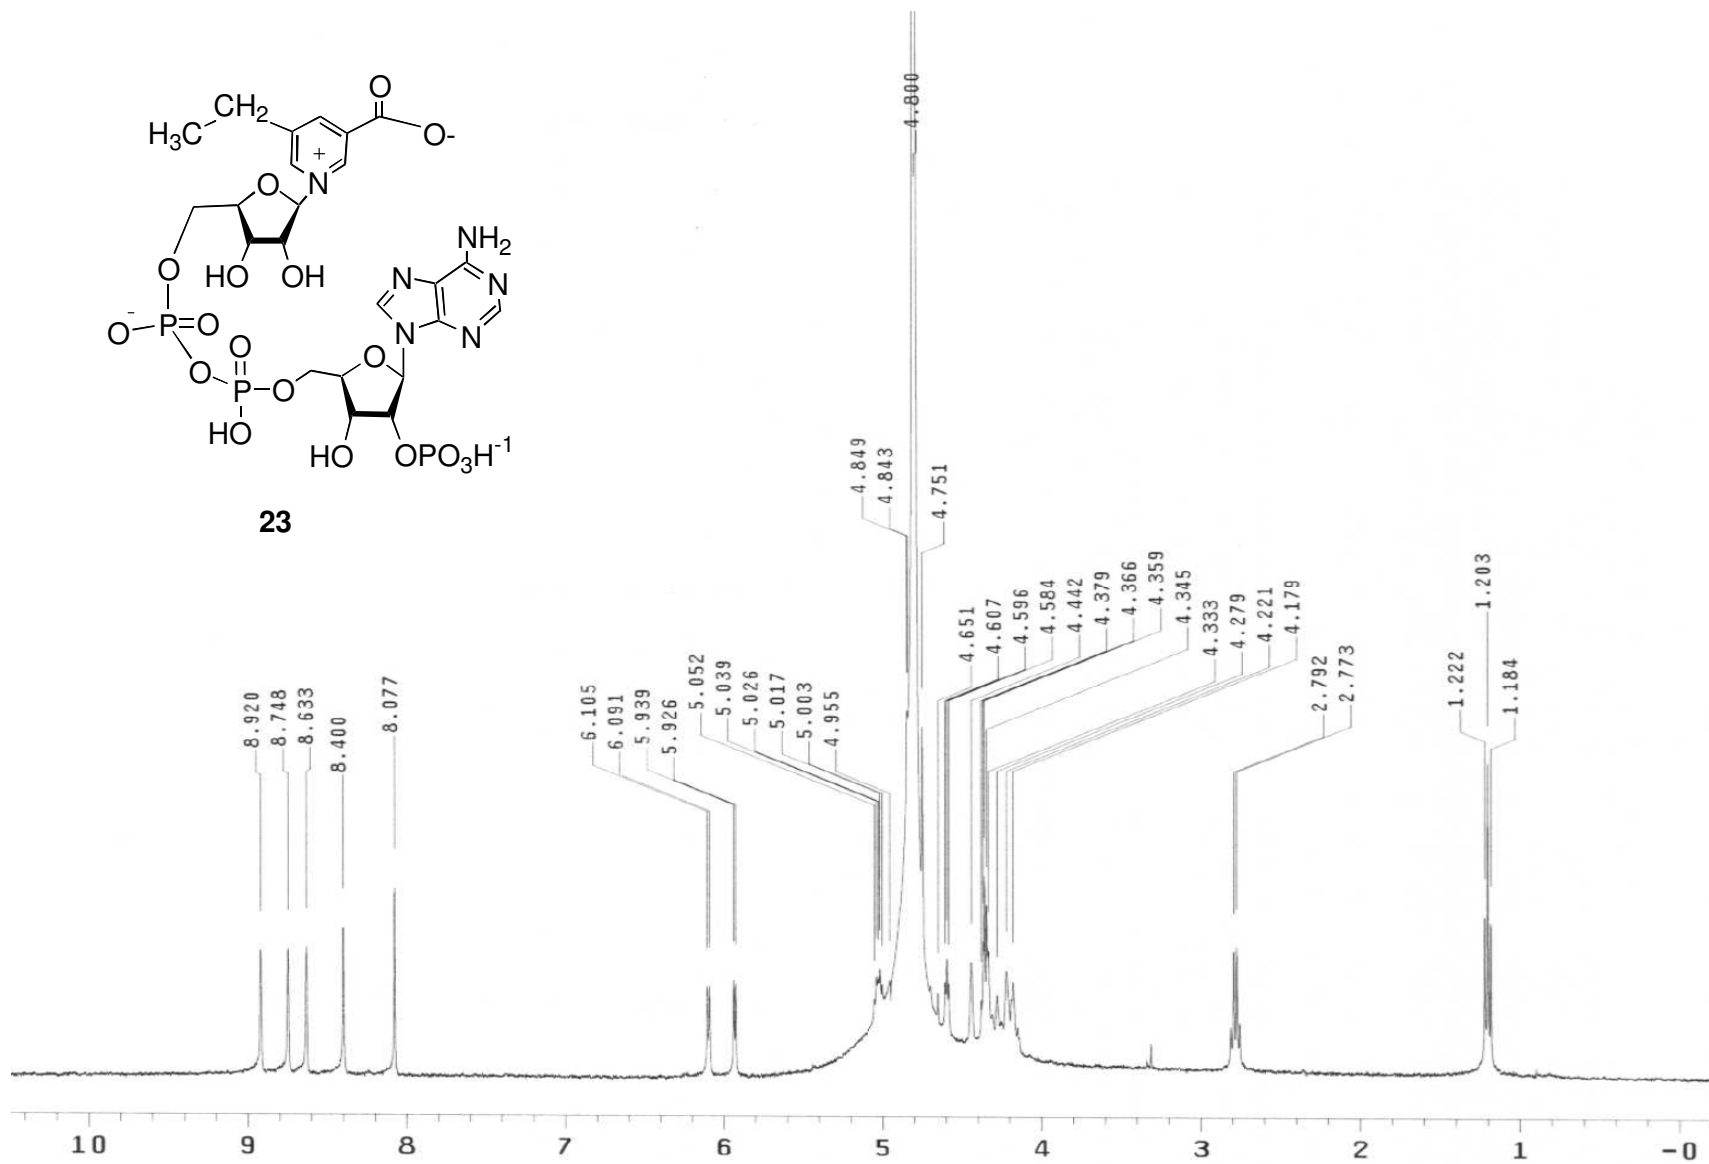

Figure S52.  $^{31}\text{P}$ -NMR of **23**: 5-ethyl-NAADP

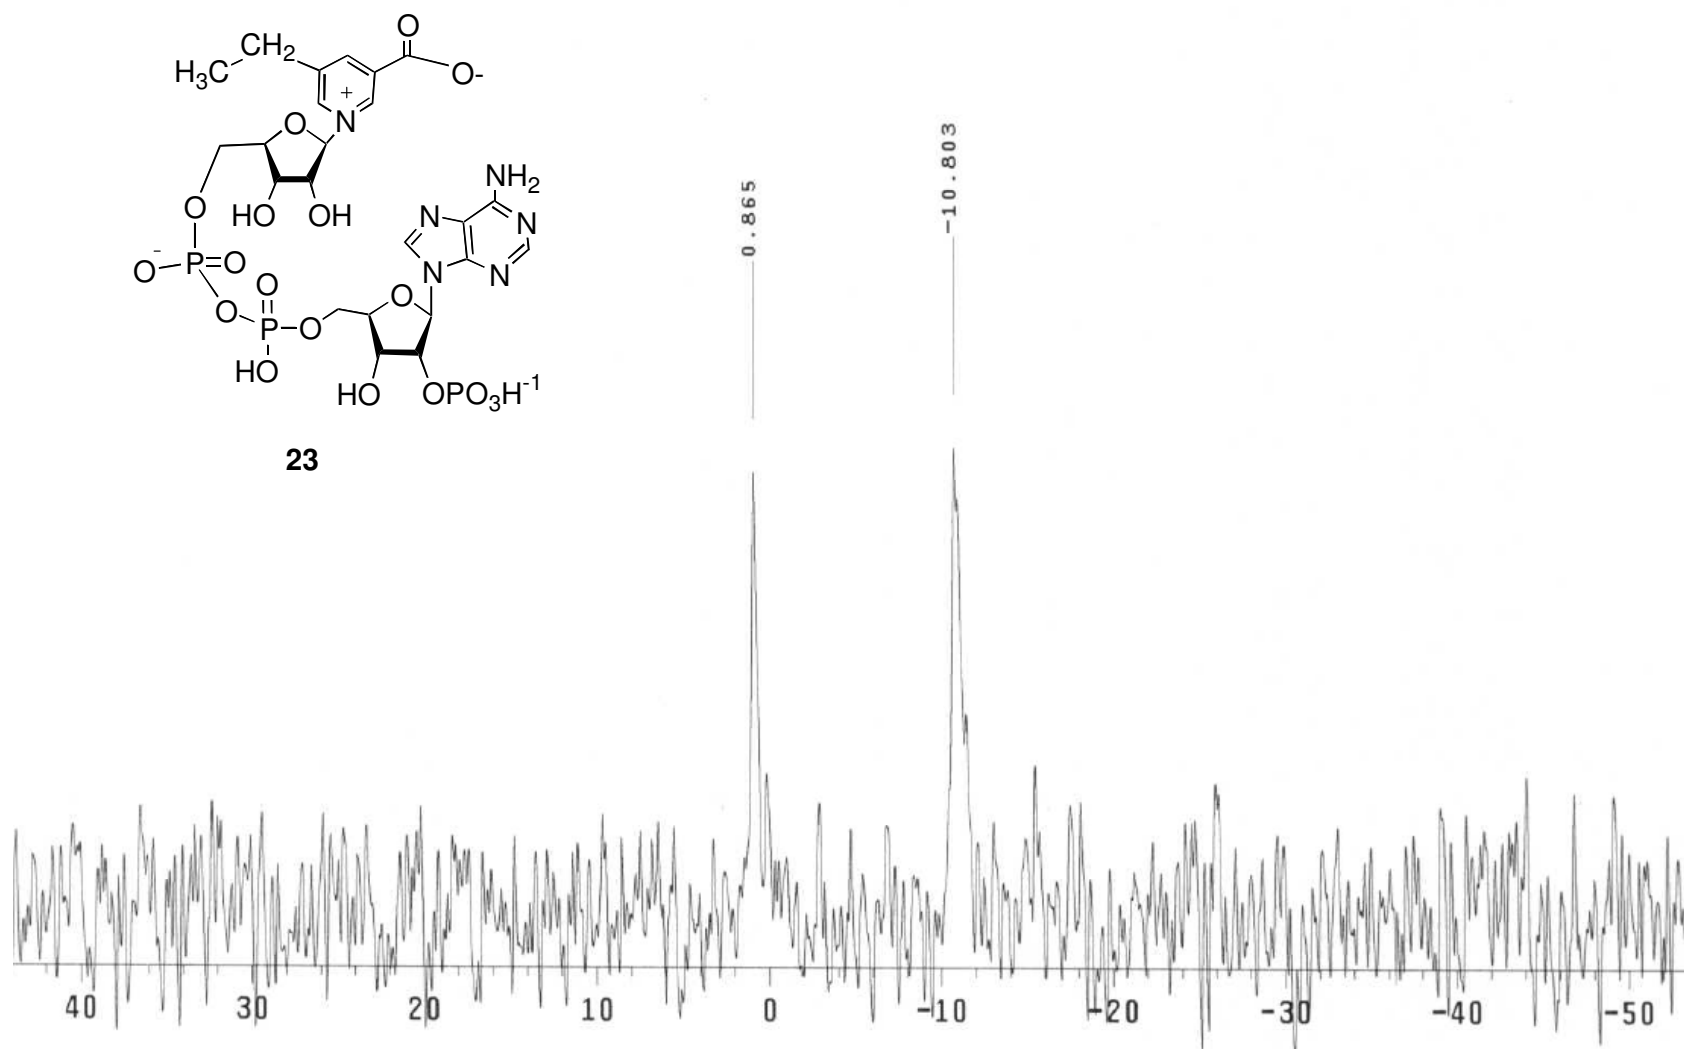



Figure S53.  $^1\text{H-NMR}$  of **24**: 5-azido-NAADP

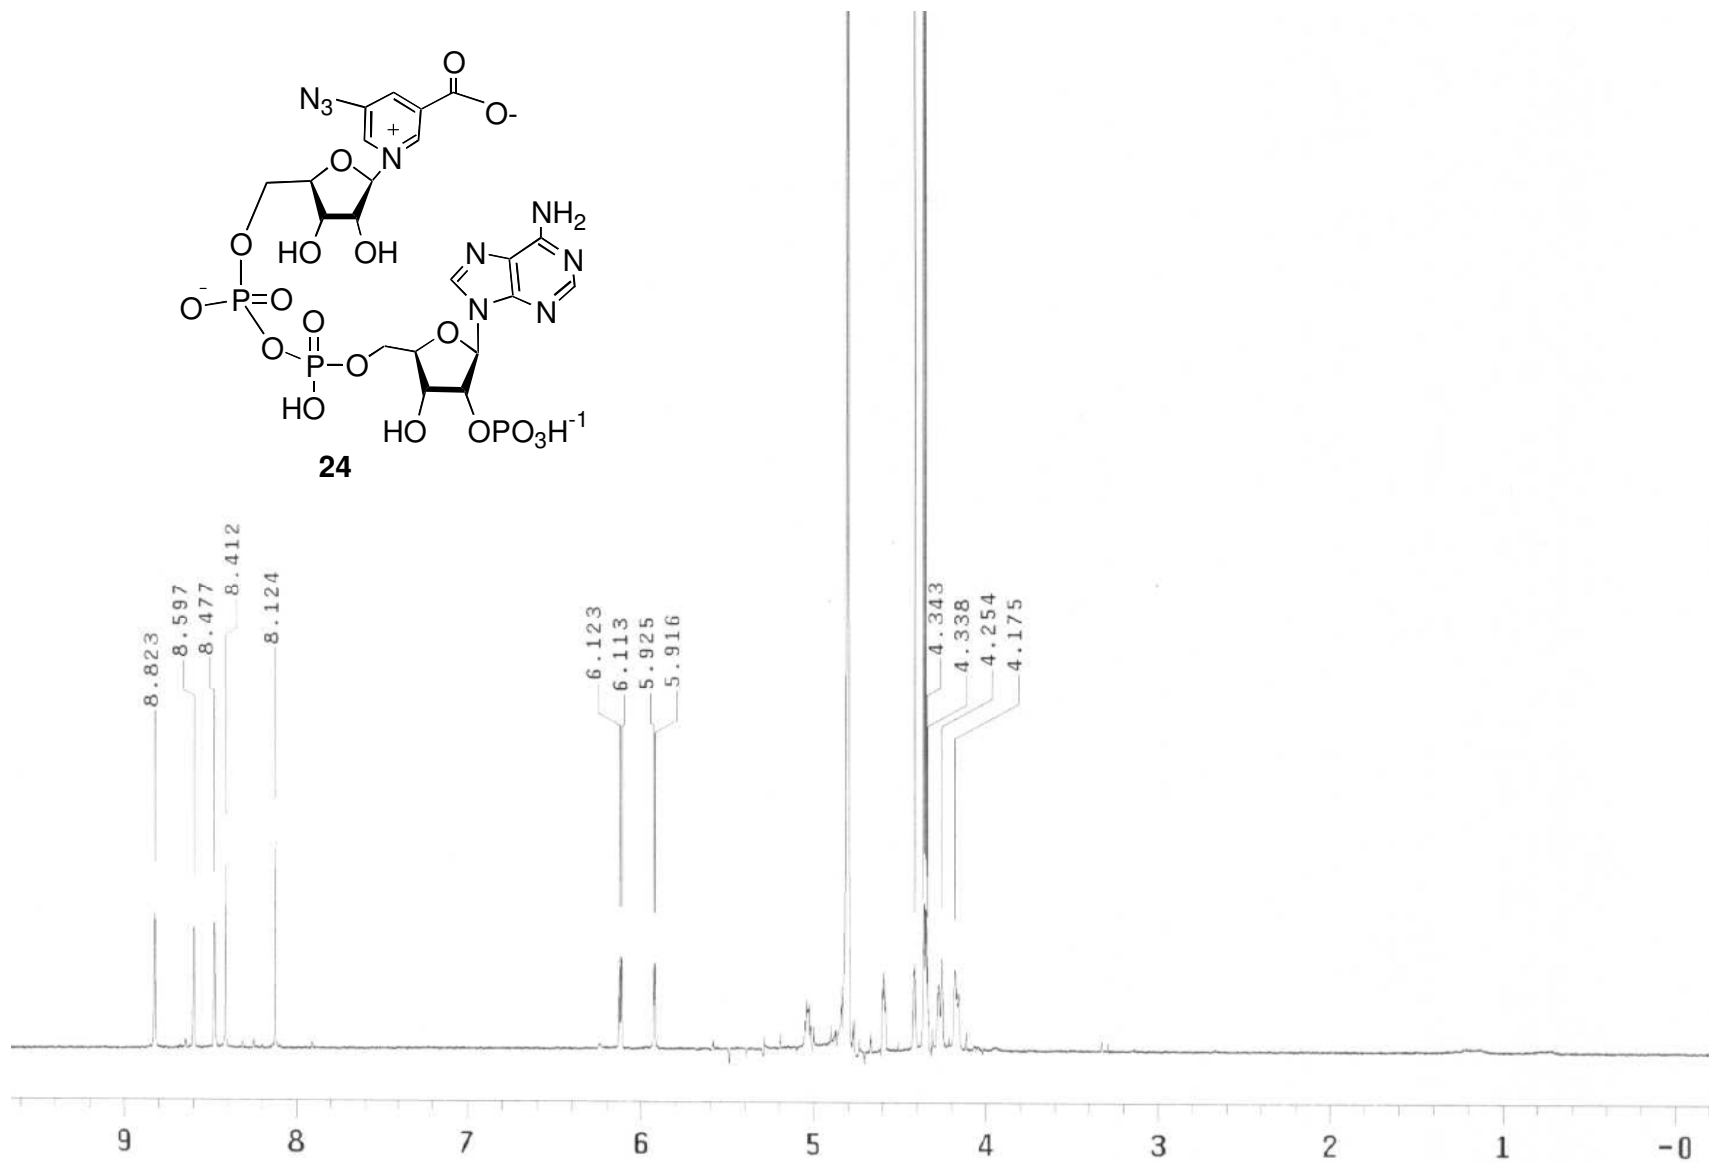

Figure S54.  $^{31}\text{P}$ -NMR of **24**: 5-azido-NAADP

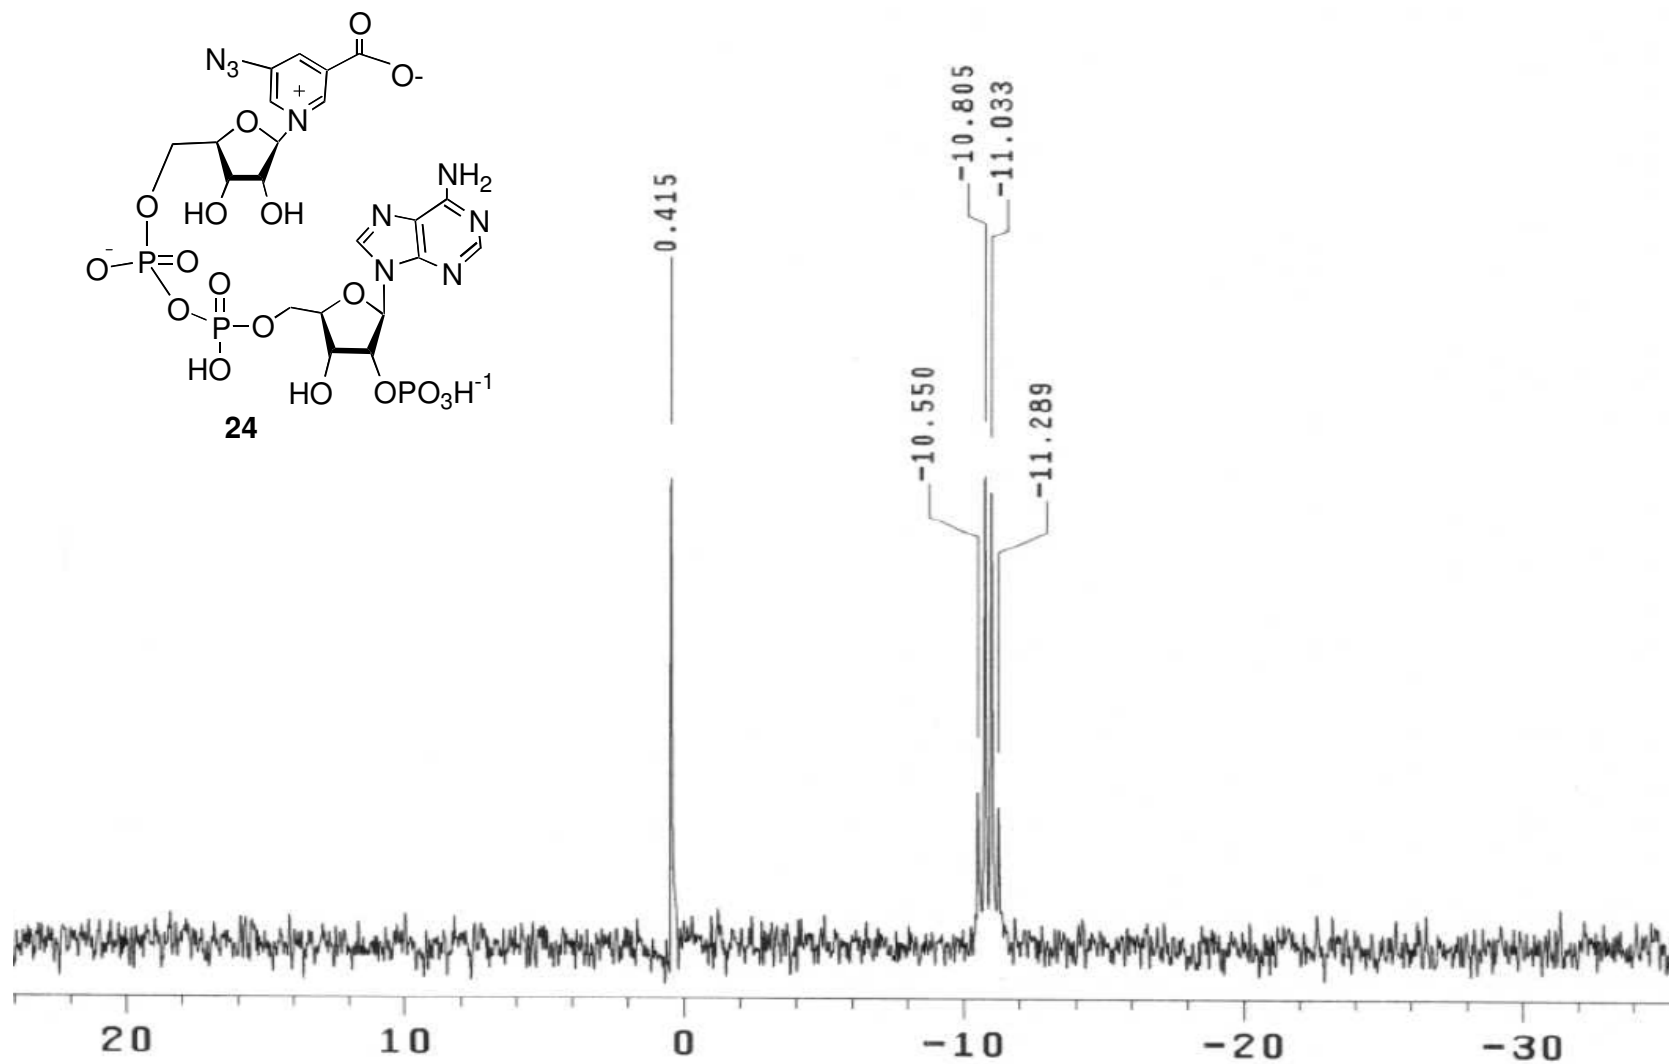

## References

- (1) Axelson, J. T.; Bodley, J. W.; Walseth, T. F. A volatile liquid chromatography system for nucleotides. *Anal. Biochem.* **1981**, *116*, 357-360.
